# Supplementary material for: Trial of feasibility and acceptability of routine low-dose aspirin versus Early Screening Test indicated aspirin for pre-eclampsia prevention (TEST study): a multicentre randomised controlled trial
Source: PubMed Central journal article supplement — BMJ Open. 2018 Jul 28;8(7):e022056. doi: 10.1136/bmjopen-2018-022056 (PMC6067363; doi:10.1136/bmjopen-2018-022056), 2018-07-28
Supplement: bmjopen-2018-022056.draft_revisions.pdf [file bmjopen-2018-022056.draft_revisions.pdf]

# BMJ Open

BMJ Open is committed to open peer review. As part of this commitment we make the peer review history of every article we publish publicly available.

When an article is published we post the peer reviewers' comments and the authors' responses online. We also post the versions of the paper that were used during peer review. These are the versions that the peer review comments apply to.

The versions of the paper that follow are the versions that were submitted during the peer review process. They are not the versions of record or the final published versions. They should not be cited or distributed as the published version of this manuscript.

BMJ Open is an open access journal and the full, final, typeset and author-corrected version of record of the manuscript is available on our site with no access controls, subscription charges or pay-per-view fees (<http://bmjopen.bmj.com>).

If you have any questions on BMJ Open's open peer review process please email [info.bmjopen@bmj.com](mailto:info.bmjopen@bmj.com)

# BMJ Open

## Trial of low dose aspirin with an Early Screening Test for preeclampsia and growth restriction TEST Study – A pilot randomised controlled trial

|                               |                                                                                                                                                                                                                                                                                                                                                                                                                                                                                                                                                                                                                                                                                                                                                                                                                                                                                                                                                                                                                                                                                                                                                                                                                                                                                                                                                                                                                                                                                                                                                                                                                                                                                                                                                                                                                 |
|-------------------------------|-----------------------------------------------------------------------------------------------------------------------------------------------------------------------------------------------------------------------------------------------------------------------------------------------------------------------------------------------------------------------------------------------------------------------------------------------------------------------------------------------------------------------------------------------------------------------------------------------------------------------------------------------------------------------------------------------------------------------------------------------------------------------------------------------------------------------------------------------------------------------------------------------------------------------------------------------------------------------------------------------------------------------------------------------------------------------------------------------------------------------------------------------------------------------------------------------------------------------------------------------------------------------------------------------------------------------------------------------------------------------------------------------------------------------------------------------------------------------------------------------------------------------------------------------------------------------------------------------------------------------------------------------------------------------------------------------------------------------------------------------------------------------------------------------------------------|
| Journal:                      | <i>BMJ Open</i>                                                                                                                                                                                                                                                                                                                                                                                                                                                                                                                                                                                                                                                                                                                                                                                                                                                                                                                                                                                                                                                                                                                                                                                                                                                                                                                                                                                                                                                                                                                                                                                                                                                                                                                                                                                                 |
| Manuscript ID                 | bmjopen-2018-022056                                                                                                                                                                                                                                                                                                                                                                                                                                                                                                                                                                                                                                                                                                                                                                                                                                                                                                                                                                                                                                                                                                                                                                                                                                                                                                                                                                                                                                                                                                                                                                                                                                                                                                                                                                                             |
| Article Type:                 | Research                                                                                                                                                                                                                                                                                                                                                                                                                                                                                                                                                                                                                                                                                                                                                                                                                                                                                                                                                                                                                                                                                                                                                                                                                                                                                                                                                                                                                                                                                                                                                                                                                                                                                                                                                                                                        |
| Date Submitted by the Author: | 30-Jan-2018                                                                                                                                                                                                                                                                                                                                                                                                                                                                                                                                                                                                                                                                                                                                                                                                                                                                                                                                                                                                                                                                                                                                                                                                                                                                                                                                                                                                                                                                                                                                                                                                                                                                                                                                                                                                     |
| Complete List of Authors:     | <p>Mone, Fionnuala; UCD Perinatal Research Centre, Obstetrics and Gynaecology, School of Medicine, University College Dublin, Mulcahy, Cecilia; UCD Perinatal Research Centre, Obstetrics and Gynaecology, School of Medicine, University College Dublin</p> <p>McParland, Peter; UCD Perinatal Research Centre, Obstetrics and Gynaecology, School of Medicine, University College Dublin</p> <p>Brethnach, FIONNUALA; Royal College of Surgeons in Ireland</p> <p>Downey, Paul; Department of Pathology and Laboratory Medicine, National Maternity Hospital</p> <p>McCormack, Dorothy; Department of Pharmacy, National Maternity Hospital</p> <p>Culliton, Marie; Department of Pathology and Laboratory Medicine, National Maternity Hospital</p> <p>Staunton, Alice; Royal College of Surgeons in Ireland</p> <p>Cody, Fiona; Royal College of Surgeons in Ireland</p> <p>Morrison, John; National University of Ireland Galway, Obstetrics and Gynaecology</p> <p>Daly, Sean; Coombe Women and Infants University Hospital, Obstetrics and Gynaecology</p> <p>Higgins, John; Department of Obstetrics and Gynaecology, University College Cork</p> <p>Cotter, Amanda; Department of Obstetrics and Gynaecology, Graduate Entry Medical School, University of Limerick</p> <p>Hunter, Alyson; Royal Maternity Hospital, Grosvenor Road, BT12 6BB</p> <p>Tully, Elizabeth; Royal College of Surgeons in Ireland, Perinatal Ireland</p> <p>Dicker, Patrick; Perinatal Ireland</p> <p>Alfirevic, Zarko; University of Liverpool, Department of Women's and Children's Health</p> <p>Malone, Fergal; Royal College of Surgeons in Ireland, Obstetrics and Gynaecology</p> <p>McAuliffe, Fionnuala; University College Dublin, School of Medicine; National Maternity Hospital, Obstetrics and Gynaecology</p> |
| Keywords:                     | preeclampsia, screening, aspirin, feasibility, low risk                                                                                                                                                                                                                                                                                                                                                                                                                                                                                                                                                                                                                                                                                                                                                                                                                                                                                                                                                                                                                                                                                                                                                                                                                                                                                                                                                                                                                                                                                                                                                                                                                                                                                                                                                         |
|                               |                                                                                                                                                                                                                                                                                                                                                                                                                                                                                                                                                                                                                                                                                                                                                                                                                                                                                                                                                                                                                                                                                                                                                                                                                                                                                                                                                                                                                                                                                                                                                                                                                                                                                                                                                                                                                 |

1  
2  
3  
4  
5  
6  
7  
8  
9  
10  
11  
12  
13  
14  
15  
16  
17  
18  
19  
20  
21  
22  
23  
24  
25  
26  
27  
28  
29  
30  
31  
32  
33  
34  
35  
36  
37  
38  
39  
40  
41  
42  
43  
44  
45  
46  
47  
48  
49  
50  
51  
52  
53  
54  
55  
56  
57  
58  
59  
60

SCHOLARONE™  
Manuscripts

For peer review only

**TITLE:** Trial of low dose aspirin with an Early Screening Test for preeclampsia and growth restriction TEST Study – A pilot randomised controlled trial

**AUTHORS:** Fionnuala MONE<sup>1</sup>, Ms. Cecilia MULCAHY<sup>1</sup>, Peter McPARLAND<sup>1</sup>, Fionnuala BREATHNACH<sup>2</sup>, Paul DOWNEY<sup>3</sup>, Ms. Dorothy MCCORMACK<sup>4</sup>, Ms. Marie CULLITON<sup>3</sup>, Alice STANTON<sup>5</sup>, Ms. Fiona CODY<sup>2</sup>, John MORRISON<sup>6</sup>, Sean DALY<sup>7</sup>, John HIGGINS<sup>8</sup>, Amanda COTTER<sup>9</sup>, Alyson HUNTER<sup>10</sup>, Elizabeth TULLY<sup>2</sup>, Patrick DICKER<sup>2</sup>, Zarko ALFIREVIC<sup>11</sup>, Fergal D MALONE<sup>2</sup>, Fionnuala M McAULIFFE<sup>1\*</sup>

**AFFILIATIONS:**

1.UCD Perinatal Research Centre, School of Medicine, University College Dublin, National Maternity Hospital, Dublin, Ireland. 2. Department of Obstetrics and Gynaecology, Royal College of Surgeons in Ireland, Rotunda Hospital, Parnell Square, Dublin 1, Ireland. 3. Department of Pathology and Laboratory Medicine, National Maternity Hospital, Holles St, Dublin 2, Ireland. 4. Department of Pharmacy, National Maternity Hospital, Holles St, Dublin 2, Ireland. 5. Molecular and Cellular Therapeutics, Royal College of Surgeons in Ireland, Dublin 2, Ireland. 6. Department of Obstetrics and Gynaecology, National University of Ireland, Galway, Ireland. 7. Department of Obstetrics and Gynaecology, Coombe Women's and Infant's University Hospital, Dublin 8, Ireland. 8. Department of Obstetrics and Gynaecology, University College Cork, Cork, Ireland. 9. Department of Obstetrics and Gynaecology, Graduate Entry Medical School, University of Limerick, Limerick, Ireland. 10. Royal Jubilee Maternity Hospital, Belfast, UK. 11. Department of women's and Children's Health, Institute of Translational Medicine, University of Liverpool, Liverpool, UK

\*Corresponding author: Prof FM McAuliffe. UCD Perinatal Research Centre, School of Medicine, University College Dublin, National Maternity Hospital, Dublin, Ireland. T:+353 1 6373216 E: [Fionnuala.mcauliffe@ucd.ie](mailto:Fionnuala.mcauliffe@ucd.ie)

**WORD Count:** 3, 423 words

**ABSTRACT**

**Objective:** Evaluate feasibility and acceptability of routine aspirin in low-risk women, compared to screening-test indicated aspirin for prevention of preeclampsia and fetal growth restriction (FGR) prevention.

**Design:** Multicentre open-label randomised controlled trial.

**Setting:** Two tertiary maternity hospitals in Dublin, Ireland.

**Participants:** 546 low-risk nulliparous women completed the study

**Interventions:** Women were randomised to; (i) routine aspirin 75mg from 11 until 36 weeks; (ii) no aspirin; and (iii) aspirin based on the Fetal Medicine Foundation screening test.

**Primary and secondary outcome measures:** (a) proportion agreeing to participate; (b) compliance with protocol; (c) proportion where first trimester uterine artery Doppler was obtainable and; (iv) time taken to issue screening result. Secondary outcomes included rates of preeclampsia and small-for-gestational age fetuses.

**Results:** 546 were included in the routine aspirin (n=179), no aspirin (n=183) and screen and treat (n=184) groups. 546 of 1054 approached (51.8%), enrolled. Average aspirin adherence was 90%. Uterine artery Doppler was obtained in 98.4% (181/184) and average time to obtain a screening result was 7.6 (0-26) days. Of those taking aspirin, vaginal spotting was greater; n=29 (15.1%), non-aspirin n=143 (7.9%) OR 2.6 (95% CI 1.2-3.6). Post-partum haemorrhage > 500mls was also greater; aspirin n=26 (13.5%), no aspirin n=20 (5.6%) OR 2.6 (95% CI 1.4-4.8). There were no differences in preeclampsia (4.5% vs. 3.8% vs. 3.8% p=0.95) or small-for-gestational-age fetuses (8% vs. 10% vs. 14% p=0.19).

**Conclusion:** Low-risk nulliparous women are open to taking aspirin in pregnancy and had

1  
2  
3 high levels of adherence. Aspirin use was associated with greater rates of vaginal bleeding.  
4  
5 An appropriately powered randomized controlled trial is now required to address the efficacy  
6  
7 and safety of universal low dose aspirin in low-risk pregnancy compared to a screening  
8  
9 approach.  
10

11 **Trial Registration:** [www.isrctn.com/ISRCTN15191778](http://www.isrctn.com/ISRCTN15191778)  
12  
13

## 14 15 16 17 **ARTICLE SUMMARY** 18

### 19 20 **Strengths and limitations of this study** 21

- 22  
23 • Robust multi-centre randomised controlled trial design
- 24  
25 • Three methods were used to assess aspirin adherence
- 26  
27 • Standardisation of methods
- 28  
29 • Potential introduction of reporting bias through open-label design  
30  
31  
32  
33  
34  
35  
36  
37  
38  
39  
40  
41  
42  
43  
44  
45  
46  
47  
48  
49  
50  
51  
52  
53  
54  
55  
56  
57  
58  
59  
60

## INTRODUCTION

Low dose aspirin use prior to 16-weeks can reduce the incidence of preeclampsia in at-risk pregnancies. When commenced at this stage, at a dose of 75mg, its efficacy in low-risk pregnancies is unknown.<sup>1,2</sup> With the emergence of first trimester screening tests for preeclampsia such as that of the Fetal Medicine Foundation (FMF), one can predict from 11-weeks, the risk of preeclampsia.<sup>3</sup> Internationally, there are conflicting consensus statements on screening methods and which women meet criteria for aspirin use.<sup>4</sup> Application of the FMF screening test and provision of low dose aspirin to screen positive women can significantly reduce the incidence of early-onset preeclampsia (4.3% aspirin vs. 1.6% placebo  $p=0.004$ ), although predictive performance of the algorithm appears to vary between populations.<sup>5</sup> It has been proposed that performance of the FMF algorithm is superior to the methods recommended by the National Institute of Clinical Excellence and American College of Obstetricians and Gynecologists (ACOG).<sup>6</sup> It may be more efficacious to prescribe low dose aspirin universally, although there is no evidence to support such a policy as yet.<sup>7</sup> To determine this, one must first evaluate if low-risk women are willing to take aspirin in pregnancy and if undergoing a comprehensive screening test is realistic in the routine setting. Hence, the primary objective of this multi-center open label randomised controlled trial was to evaluate the acceptability and feasibility of women taking aspirin 75mg from beyond 11-weeks gestation versus screening test-indicated aspirin. Secondary outcomes included rates of; (i) preeclampsia; (ii) small-for-gestational age infants; (iii) pre-term delivery; (iv) admission to neonatal intensive care; (v) placental abruption; (vi) any reported death and; (vii) acceptability of women taking aspirin routinely versus test indicated aspirin, assessed by a questionnaire.

## METHODS

### Study Design

This open-label multicenter randomised controlled trial (RCT) was performed in two Irish tertiary maternity hospitals with 18,000 deliveries per annum. The aim was to include three centers, however there was a delay in the local ethics committee decision for the third center (subsequently approved), which was excluded in the interests of study schedule. The protocol for this multicenter randomised controlled trial has been published<sup>8</sup> and was prospectively authorized by the Health Products Regulatory Authority and National Maternity Hospital Central Ethics Committee. The trial was registered with the ISRCTN number 15191778 and was supported by Perinatal Ireland HRB and the HRB Mother and Baby Clinical Trials Network following external peer review for scientific quality. The funder of the study had no role in study design, data collection, data analysis, data interpretation, or writing of the manuscript. An independent Trial Steering Committee and Data Monitoring Committee met quarterly to oversee the safety of the trial participants.

Nulliparous women over 18-years-old between 11 to 13+6 weeks gestation with a viable singleton pregnancy that didn't meet criteria for aspirin commencement based upon major preeclampsia risk factors (chronic kidney disease, autoimmune disease e.g. systemic lupus erythematosus, diabetes mellitus and chronic hypertension) were eligible for inclusion and thus were recruited at antenatal booking clinics selected at random.<sup>9</sup> In Ireland it is currently not routine obstetric practice to commence aspirin in women that do not have an aforementioned major risk factor for pre-eclampsia as defined by the National Institute of Health and Clinical Excellence.<sup>9</sup> Exclusion criteria included participants already taking part in a clinical trial, co-existence of fetal congenital anomaly at recruitment or those with aspirin hypersensitivity. All participants provided written informed consent and were recruited by



1  
2  
3 the research clinician at the first trimester antenatal booking visit.  
4  
5

### 6 7 **Randomization**

8  
9 Participants underwent online computerized randomization based on blocks of six to; (i)  
10 aspirin 75mg from 11 to 13+6 weeks once daily until 36-weeks' gestation; (ii) no aspirin and;  
11  
12 (iii) aspirin depending on the result of the FMF screening test. Subjects in non-aspirin taking  
13  
14 groups had routine antenatal care.  
15  
16

### 17 18 19 **Intervention**

20  
21 Enteric coated Nu-Seals Aspirin (Acetylsalicylic Acid) 75mg orally once daily at night from  
22  
23 11 to 36-weeks gestation was provided free of charge from Alliance Pharma®, which were  
24  
25 independent of study protocol and analysis. A dose of 75mg was used as this is currently the  
26  
27 standard recommended dosage in the UK and Ireland for at-risk women.<sup>9</sup>  
28  
29 Aspirin adherence was assessed subjectively via patient reported diary cards and tablet counts  
30  
31 (checked by research clinician and pharmacist) and objectively via assessment of change in  
32  
33 urinary 11-dehydroxothromboxane-B2 (TxB2). Any reduction in TxB2 between first (pre-  
34  
35 aspirin) and second trimester (post-aspirin) levels was taken to suggest that a subject had  
36  
37 ingested aspirin within the last ten days.<sup>10</sup>  
38  
39  
40  
41  
42  
43

### 44 **Baseline review and follow-up**

45  
46 Participants underwent two scheduled study visits, at study recruitment and at 20-22 weeks  
47  
48 with diary cards and aspirin tablets returned to the research team at 36-weeks gestation.  
49  
50 Participants completed an anonymous questionnaire at 20-22 weeks based on acceptability of  
51  
52 taking aspirin in pregnancy.  
53  
54  
55  
56  
57  
58  
59  
60

1  
2  
3 Study assessments at the time of the recruitment visit included the FMF screening test, the  
4 results of which were assessed for those in Group 3 (screen and treat). The FMF screening  
5 test was not routine practice within Ireland. Components of the screening test included;  
6 maternal history (including ovulation induced conception, race, body mass index, age, mother  
7 with preeclampsia); mean arterial blood pressure (MAP); uterine artery Doppler pulsatility  
8 index; and pregnancy associated plasma protein-A (PAPP-A) and placental like growth factor  
9 (PLGF) multiples of the median. To determine risk of preeclampsia, the FMF algorithm was  
10 used and based upon a screen positive rate of 5%, a cut off for preeclampsia prior to 42-  
11 weeks at greater than 1:8 was used.<sup>3</sup> This cut-off was selected with the aim of capturing the  
12 majority of preeclamptics; both pre and post-term and at the time of study commencement  
13 this was the optimal screening algorithm for detection of any preeclampsia. Two un-blinded  
14 trained clinical research sonographers performed the first trimester uterine artery Doppler  
15 waveforms and MAP and interpreted findings. MAP was assessed using an automated blood  
16 pressure monitoring device as outlined by the technique stipulated by the FMF.<sup>11</sup> Uterine  
17 artery Doppler velocimetry was obtained using Viewpoint® Version 5.6.16 GE Healthcare,  
18 2012 and Voluson Expert 730®, GE 2012 using the technique outlined from by the  
19 International Society of Ultrasound in Obstetrics and Gynecology. The pulsatility index was  
20 measured from both uterine arteries and an average value was calculated.<sup>12</sup>

21  
22  
23  
24  
25  
26  
27  
28  
29  
30  
31  
32  
33  
34  
35  
36  
37  
38  
39  
40  
41  
42  
43  
44 A maternal blood sample was analyzed for PAPP-A and PLGF under standard conditions  
45 using a 6000 DELFIA® Xpress, PerkinElmer, 2014 clinical random access screening  
46 platform in the hospital clinical biochemistry laboratory. A quantitative immunoturbimetric  
47 TxBCardio® immunoassay was used to determine TxB2 levels in urine samples obtained  
48 both study visits. These were then standardized as a ratio with creatinine levels and  
49 expressed as pg/mg creatinine.  
50  
51  
52  
53  
54  
55  
56  
57  
58  
59  
60

## Outcomes

The primary objective was to evaluate the feasibility and acceptability of low-risk nulliparous women taking aspirin versus test indicated aspirin in pregnancy. Outcome measures included;

- (i) The proportion of eligible women agreeing to participate in a trial where aspirin is prescribed routinely (feasibility);
- (ii) Compliance with study protocol, as measured by the following: (a) adherence to aspirin (acceptability), (b) attendance at study visits (acceptability), (c) satisfactory collection of all endpoints and variables (feasibility), (d) specific study protocol violations (feasibility);
- (iii) The proportion of women in whom it was possible to obtain first trimester trans-abdominal uterine artery Doppler velocimetry examination (feasibility);
- (iv) Proportion of women with a completed screening test who were issued the screening result within one week of having the test performed (feasibility);

Secondary outcomes included rates of; (i) preeclampsia; (ii) small-for-gestational-age (SGA) infants (customised sex-specific birth-weight <10<sup>th</sup> centile); (iii) pre-term delivery prior to 34-weeks; (iv) admission to neonatal intensive care unit (NICU); (v) placental abruption; (vi) any reported death (stillbirth, neonatal or infant death) and; (vii) acceptability of women taking aspirin routinely versus test indicated aspirin as assessed by an anonymous questionnaire at 20-22 weeks. As part of routine antenatal care women had an appointment with their midwife and or clinician at booking (11-14 weeks), 16-weeks, 18-20 weeks, 25-weeks, 28-weeks, 31-weeks, 34-weeks, 36-weeks, 28-weeks, 40-weeks and 41-weeks gestation in line with hospital protocol. At each visit blood pressure was assessed using mercury sphygmomanometry and a urine dipstick for proteinuria was performed with

1  
2  
3 symphysio-fundal-height and or fetal biometrical ultrasound assessment as appropriate. Pre-  
4 eclampsia was defined based upon the definition from the ISSHP with new onset  
5 hypertension (>140mmHg systolic or >90mmHg diastolic) after 20-weeks gestation  
6 associated with; (i) proteinuria of at least 1g/L [2+] on urine dipstick testing, and or; (ii)  
7 maternal organ dysfunction ; an or fetal growth restriction.<sup>13</sup> Suspicion of a diagnosis of pre-  
8 eclampsia at an antenatal visit prompted further investigation in the fetal assessment unit with  
9 clinical examination, blood testing (urea and creatinine, liver function tests and full blood  
10 picture), 24-hour urine collection for proteinuria and departmental fetal ultrasound  
11 assessment with final diagnosis made by an obstetrician.  
12  
13  
14  
15  
16  
17  
18  
19  
20  
21  
22  
23

24 Safety data were reported as adverse and serious adverse events and participants discontinued  
25 from the study were recorded in addition to the reason for discontinuation and outcome. As  
26 an assessment of post-partum haemorrhage, blood loss was weighed at time of delivery.  
27  
28  
29  
30  
31  
32

### 33 **Statistical Analysis**

34  
35 As outlined in the published study protocol, the projected sample size for this study was 500  
36 women across two sites with 18,000 deliveries per annum.<sup>8</sup> To determine preeclampsia as a  
37 primary outcome, the anticipated number of patients required is over 15,000 women. As this  
38 study aimed to determine the feasibility of such a study, 500 participants were more than  
39 adequate as 3% of the number required for a substantive study is required (n=450).<sup>14</sup>  
40 Accounting for a drop-out rate of 10% (n=45), 500 participants were adequate to obtain the  
41 primary outcome. Analysis was performed by a statistician using SAS v.20 on the intention-  
42 to-treat (ITT) population, which included all participants randomised, which completed the  
43 full second trimester assessment. Measures of variance included standard deviation. Follow-  
44 up of serious adverse events continued until 28-days following delivery. Adverse events were  
45  
46  
47  
48  
49  
50  
51  
52  
53  
54  
55  
56  
57  
58  
59  
60

1  
2  
3 reported as odds ratios (OR). To assess secondary outcome and safety, comparisons of  
4  
5 groups were be performed using two sample t-tests, Wilcoxon Rank-sum tests and Chi-square  
6  
7 tests.  
8  
9  
10  
11

## 12 **Patient Involvement**

13  
14  
15 Although patients were not directly involved in devising the study protocol and design the  
16  
17 burden of the RCT intervention (i.e. taking aspirin and undergoing the FMF screening test)  
18  
19 was assessed by means of an anonymous questionnaire completed at 20-22 weeks gestation.  
20  
21 At the time of study participation subjects were informed that study results could be viewed  
22  
23 following publication on the study website; <http://perinatalireland.ie/research/test/>  
24  
25  
26  
27  
28  
29  
30  
31  
32  
33  
34  
35  
36  
37  
38  
39  
40  
41  
42  
43  
44  
45  
46  
47  
48  
49  
50  
51  
52  
53  
54  
55  
56  
57  
58  
59  
60

## RESULTS

Subjects were recruited between 8<sup>th</sup> May 2014 to 23<sup>rd</sup> September 2015. In total 1054 eligible women were approached to take part in the study and of these, 557 underwent randomization [Figure 1]. In the screen and treat population (Group 3) n=184, 13 (7.1%) women had a risk of developing preeclampsia >1:8 and subsequently commenced aspirin until 36-weeks gestation. Eleven women were excluded from the study leaving 546 in the ITT population. In total there were 192 women in the ITT group that were taking aspirin as per randomization and 354 not taking aspirin. There were no significant differences between groups at baseline [Table 1].

| Characteristic                              | Low Dose Aspirin<br>N=179 | No Aspirin<br>N=183 | Screen & Treat<br>N=184 |
|---------------------------------------------|---------------------------|---------------------|-------------------------|
| Age (yr)                                    | 33 (19-44)                | 34 (18-43)          | 33 (19-44)              |
| Race – No. (%)                              |                           |                     |                         |
| White                                       | 181 (97.9)                | 179 (95.7)          | 180 (97.3)              |
| Black                                       | 1 (0.5)                   | 2 (1.1)             | 0 (0)                   |
| Asian                                       | 3 (1.6)                   | 6 (3.2)             | 5 (2.7)                 |
| Other                                       | 0                         | 0 (0)               | 0 (0)                   |
| Completed secondary school – No.(%)         | 136 (73.5)                | 143 (76.4)          | 152 (82.2)              |
| BMI (kg/m <sup>2</sup> )                    | 25.2 (17.4-39.4)          | 22.9 (17.7-41.4)    | 23.8 (18.1-45.2)        |
| Gestational Age (wks)                       | 12.9 (11.1-13.9)          | 12.9 (11.1-13.9)    | 12.9 (11.3-13.9)        |
| Smoking – No. (%)                           | 17(9.2)                   | 11 (5.9)            | 7 (3.8)                 |
| Subject's mother had preeclampsia - No. (%) | 7 (3.8)                   | 10 (5.4)            | 10 (5.4)                |
| Conception – No. (%)                        |                           |                     |                         |
| IVF                                         | 5 (2.7)                   | 9 (4.8)             | 8 (4.3)                 |
| ICSI                                        | 3 (1.6)                   | 4 (2.1)             | 3 (1.6)                 |
| Ovulation induction                         | 5 (2.7)                   | 6 (3.2)             | 6 (3.2)                 |
| Spontaneous                                 | 172 (93.0)                | 168 (89.9)          | 170 (91.9)              |
| Previous miscarriage – No. (%)              | 20 (10.8)                 | 31 (16.6)           | 31 (16.8)               |

1  
2  
3 Table 1: Baseline characteristics of the study population. Where number (No.) percentage is  
4  
5 not expressed average and range are demonstrated.  
6  
7

### 8 9 **Primary outcomes**

10  
11 (i) The proportion of eligible women agreeing to participate in a trial where aspirin is  
12 prescribed routinely (feasibility); 1054 women were approached that were eligible to partake.  
13  
14 497 were subsequently not enrolled as they did not want to take aspirin n=454 or for an  
15  
16 alternative reason n=43 e.g. appointment did not suit. Hence 546/1054 (51.8%) women were  
17  
18 willing to partake in a study where they may have to take aspirin routinely.  
19  
20  
21

22  
23  
24 (ii) Compliance with study protocol, as measured by the following: (a) adherence to aspirin  
25 (acceptability), (b) attendance at study visits (acceptability), (c) satisfactory collection of all  
26  
27 endpoints and variables (feasibility), (d) specific study protocol violations (feasibility);  
28  
29

30  
31  
32  
33 (a) Of those women included in analysis that were taking aspirin (n=192), the average  
34 adherence based upon patient reported diary cards was 96.0% and based upon tablet counts  
35  
36 95.0%. Seven women were non-adherent and 19 (10.0%) poorly compliant (<80%).  
37  
38 Average adherence was 95.0% in both the test indicated aspirin group (3a) and routine aspirin  
39  
40 group (1) [Table 2]. The median first trimester pre-aspirin urine TxB2 level was 8662.2  
41  
42 pg/mg (IQR 2014.5-9931.5) and second trimester (post-aspirin) 2285.1 pg/mg (IQR 591.0-  
43  
44 2300.1). The percentage change in TxB2 was then assessed for all paired samples (n=147)  
45  
46 and found that 124/147 (84.4%) of subjects had a fall in TxB2 levels between the first and  
47  
48 second trimesters versus 23/147 (15.6%) who had an increase p<0.001. The greater the  
49  
50 reduction in urinary TxB2 pre- and post- aspirin dose the greater the degree of aspirin  
51  
52  
53  
54  
55  
56  
57  
58  
59  
60

1  
2  
3 adherence, as demonstrated in Figure 2. There was no difference between patient groups  
4 (routine aspirin and screen positive aspirin) and percentage change in urine TxB2 (p=0.61).  
5  
6  
7

8  
9 (b) Of those that underwent randomization (n=557), eleven were excluded prior to fulfillment  
10 of study participation requirements (attendance at second study visit). Of the eleven, three  
11 withdrew consent for participation as they decided that they did not wish to take aspirin  
12 following randomization.  
13  
14  
15  
16

17  
18 (c) Of all 546 subjects collection of outcome measures and variables were obtained for all  
19 apart from the questionnaire on patient acceptability, which was completed in 97.1%  
20 (530/546).  
21  
22  
23  
24  
25  
26

27  
28 d) Six protocol violations were recorded (0.01 per 100 participants) including women  
29 transferring care to another hospital (n=3), incorrect randomization of women that did not  
30 meet inclusion criteria (n=2) and a subject in the non-aspirin group commencing aspirin by  
31 their clinician (n=1).  
32  
33  
34  
35  
36  
37

38  
39 (iii) The proportion of women in whom it was possible to obtain first trimester trans-  
40 abdominal uterine artery Doppler velocimetry (feasibility); The FMF screening test was  
41 completed in 98.4% (181/184) following successful uterine artery Doppler velocimetry  
42 acquisition, of which one was obtained vaginally due to challenges with abdominal  
43 acquisition, with an overall sonographer reported ease of acquisition 3.1 (SD +/- 0.91) (score  
44 1 (easy) to 5 (unobtainable)) [Table 2].  
45  
46  
47  
48  
49  
50  
51  
52  
53  
54  
55  
56  
57  
58  
59  
60



(iv) Proportion of women with a completed screening test, issued the result within one week of the test (feasibility); The average time to obtain laboratory analyzed PAPP-A and PLGF so that a screening result could be issued was 7.6 days (0-26) with 78 (42.4%) of women waiting greater than one week and five women being beyond 16-weeks prior to result availability [Table 2].

| Adherence and feasibility parameter | Low-dose Aspirin (N=179) | No Aspirin (N=183) | Screen & Treat (N=184) |
|-------------------------------------|--------------------------|--------------------|------------------------|
| Ease of Doppler acquisition         |                          |                    |                        |
| Very easy                           |                          |                    | 8 (4%)                 |
| Easy                                |                          |                    | 53 (29%)               |
| Fair                                |                          |                    | 61 (33%)               |
| Difficult                           |                          |                    | 60 (32%)               |
| Unobtainable                        |                          |                    | 3 (2%)                 |
| Days to PLGF/PAPPA visit 1          |                          |                    | 7.6<br>[0 - 26]        |
| PLGF/PAPPA result > 16 weeks        |                          |                    | 5 (3%)                 |
| Time taken for visit 1 (mins)       | 60<br>[30 – 100]         | 60<br>[25 - 90]    | 60<br>[25 - 90]        |
| Median adherence tablet counts      | 96%                      |                    | 95% (screen positive)  |

|                              |        |  |                       |
|------------------------------|--------|--|-----------------------|
| Median adherence diary cards | 94%    |  | 95% (screen positive) |
| Non-adherent                 | 7 (4%) |  | 0 (0%)                |

Table 2: Primary outcomes of feasibility and adherence

For peer review only

### Secondary outcomes

There was no difference between groups in relation to secondary outcomes [Table 3]. For the overall cohort, there were three cases (0.37%) of early onset preeclampsia <34-weeks (0.55%), n=22 (4.03%) any preeclampsia, n=57 (10.44%) SGA infants and 15.02% (n=82) placental disease. Secondary outcomes for groups 3A (screen positive aspirin) and 3B (screen negative no aspirin) are demonstrated in Table S1 [supplementary]. Despite taking aspirin, there remained a significantly greater number with preeclampsia at <37-weeks in the screen positive versus the screen negative group, although numbers were small (n=2 (15.4%) vs. n=2 (1.2%) p=0.02). In terms of taking aspirin in a subsequent pregnancy, the questionnaire revealed that 92.3% (489/530) were willing to take aspirin in a subsequent pregnancy; 92.5% (173/187) of aspirin takers and 91.5% (314/343) of non-aspirin takers.

| Outcome                                       | Low Dose Aspirin (Group 1)<br>N=179 | No Aspirin (Group 2)<br>N=183 | Screen and Treat (Group 3)<br>N=184 | p-value |
|-----------------------------------------------|-------------------------------------|-------------------------------|-------------------------------------|---------|
| Gestation at delivery (weeks)                 | 40.2 (1.4)                          | 39.9 (1.9)                    | 40.2 (1.5)                          | 0.13    |
| Birthweight (g)                               | 3529 (469)                          | 3478 (493)                    | 3488 (502)                          | 0.58    |
| Birthweight <10 <sup>th</sup> centile No. (%) | 14 (8%)                             | 18(10%)                       | 25 (14%)                            | 0.19    |
| Mode of delivery No. (%)                      |                                     |                               |                                     |         |
| Spontaneous                                   | 85 (47.5)                           | 95 (52.0)                     | 88 (47.8)                           | 0.64    |
| Instrumental                                  | 56 (31.3)                           | 47 (25.7)                     | 51 (27.7)                           | 0.09    |
| Caesarean                                     | 38 (21.2)                           | 41 (22.3)                     | 45 (24.5)                           | 0.68    |
| Pre-term delivery <34 weeks No. (%)           | 1 (0.6)                             | 3 (1.6)                       | 2 (1.1)                             | 0.62    |
| Spontaneous Labor No. (%)                     | 96 (53.7)                           | 103 (56.3)                    | 101 (54.9)                          | 0.88    |
| Gender No. (%)                                |                                     |                               |                                     |         |
| Male                                          | 91 (50.8)                           | 91 (49.7)                     | 100 (54.3)                          | 0.65    |
| Female                                        | 88 (49.2)                           | 92 (50.3)                     | 84 (45.7)                           | 0.65    |
| Preeclampsia No. (%)                          | 8 (4.5)                             | 7 (3.8)                       | 7 (3.8)                             | 0.95    |
| Preeclampsia <34-weeks                        | 0 (0)                               | 2 (1.1)                       | 1 (0.5)                             | 0.56    |
| Preeclampsia <37-weeks                        | 2 (1.1)                             | 2 (1.1)                       | 2 (1.1)                             | 0.99    |
| Abruption No. (%)                             | 1 (0.5)                             | 0 (0)                         | 0 (0)                               | 0.71    |
| NICU admission No. (%)                        | 9 (5.0)                             | 7 (3.8)                       | 9 (4.9)                             | 0.83    |
| Apgar < 7 No. (%)                             | 5 (2.8)                             | 2 (1.6)                       | 3 (1.6)                             | 0.46    |
| Cord pH (arterial)                            | 7.3 (0.1)                           | 7.3 (0.1)                     | 7.3 (0.1)                           | 0.55    |
| Outcome No. (%)                               |                                     |                               |                                     |         |
| Alive at 6-weeks                              | 177 (98.9)                          | 181 (99.0)                    | 182 (98.9)                          | 0.99    |
| Stillbirth                                    | 2 (1.1)                             | 1 (0.5)                       | 0 (0)                               | 0.81    |
| Neonatal death                                | 0 (0)                               | 1 (0.5)                       | 2 (1.1)                             | 0.37    |

Table 3: Secondary outcome measures

(Expressed as average and standard deviation unless otherwise stated)

## Safety

There were differences between groups in relation to adverse but not serious adverse events [Tables 4 and S2]. There were six perinatal deaths, all of which underwent postmortem. In the aspirin group there was one placental abruption and one case of intervillous haemorrhage. Perinatal deaths in the non-aspirin groups were due to delayed villous maturation, severe FGR, fetal thrombotic vasculopathy and neonatal septicemia. There was a difference between groups in terms of reported vaginal spotting aspirin 15.1% vs. non-aspirin 7.9% OR 2.1 (CI 1.2-3.6), which was not associated with pregnancy loss. Although, not statistically significant, there was a difference in terms of PPH >1000mls. Although rates of PPH <1000mls were greater in the aspirin-taking group, no differences were noted in terms of blood transfusion or significant hemoglobin drop to <8g/dL.

| Event                           |                                 | Aspirin<br>n=192 | Non-aspirin<br>n=354 | Odds ratio<br>(95% CI) |
|---------------------------------|---------------------------------|------------------|----------------------|------------------------|
| <b>Adverse Events</b>           |                                 |                  |                      |                        |
| Adverse Events Total No.        |                                 | 123              | 143                  | 2.6 (1.8-3.8)          |
| Vaginal spotting* No. (%)       |                                 | 29(15.1)         | 28 (7.9)             | 2.1 (1.2-3.6)          |
| Post-partum haemorrhage No. (%) |                                 |                  |                      |                        |
| >500mls*                        |                                 | 26(13.5)         | 20 (5.6)             | 2.6 (1.4-4.8)          |
| >1000mls                        |                                 | 7 (3.6)          | 5 (1.4)              | 2.8 (0.9-9.0)          |
| Blood transfusion               |                                 | 3                | 4                    | 0.5 (0.1-2.7)          |
| Hb drop <8g/dL                  |                                 | 4                | 7                    | 0.3 (0.1-1.4)          |
| <b>Serious Adverse Event</b>    |                                 |                  |                      |                        |
| NICU admission                  | Sepsis                          | 3                | 2                    |                        |
|                                 | Hypoglycaemia                   | 0                | 1                    |                        |
|                                 | Prematurity                     | 1                | 4                    |                        |
|                                 | Jaundice                        | 1                | 1                    |                        |
|                                 | Persistently low Apgar          | 1                | 3                    |                        |
|                                 | TTN                             | 1                | 3                    |                        |
|                                 | Meconium aspiration             | 1                | 0                    |                        |
|                                 | Hypoxic ischemic encephalopathy | 1                | 1                    |                        |
|                                 | Very low birthweight            | 0                | 1                    |                        |
| Total                           |                                 | 9                | 16                   | 1.04 (0.45-2.40)       |
| Perinatal Death                 |                                 | 2                | 4                    |                        |
| Total                           |                                 | 2                | 4                    | 0.92 (0.17-5.10)       |
| Maternal admission              | Preterm labor                   | 3                | 2                    |                        |
|                                 | Preeclampsia                    | 8                | 7                    |                        |
|                                 | Antepartum hemorrhage           | 3                | 7                    |                        |
|                                 | PPROM                           | 0                | 2                    |                        |
|                                 | Fetal compromise                | 1                | 2                    |                        |
|                                 | Infection                       | 2                | 5                    |                        |
|                                 | Other                           | 4                | 1                    |                        |
| Total                           |                                 | 21               | 26                   | 1.55 (0.85-2.83)       |
| Congenital anomaly              | Cardiac                         | 1                | 2                    |                        |
|                                 | Gastrointestinal                | 3                | 2                    |                        |
|                                 | Neurological                    | 0                | 1                    |                        |
|                                 | Renal                           | 0                | 1                    |                        |
| Total                           |                                 | 4                | 6                    | 1.23 (0.34-4.43)       |
| Total serious adverse events    |                                 | 36               | 52                   | 1.34 (0.84-2.14)       |

1  
2  
3  
4  
5 Table 4: Adverse and serious adverse events in aspirin and non-aspirin taking groups. There  
6  
7 may be >1 adverse event or serious adverse event per subject \* ( $p<0.05$ ) [NICU=Neonatal  
8  
9 intensive care unit, TTN= transient tachypnea of the newborn, PPOM= preterm premature  
10  
11 rupture of membranes, Very low birthweight = <1500g].  
12  
13  
14  
15  
16  
17  
18  
19  
20  
21  
22  
23  
24  
25  
26  
27  
28  
29  
30  
31  
32  
33  
34  
35  
36  
37  
38  
39  
40  
41  
42  
43  
44  
45  
46  
47  
48  
49  
50  
51  
52  
53  
54  
55  
56  
57  
58  
59  
60

## DISCUSSION

### Main Findings

This randomised controlled trial has found that low-risk nulliparous women were open to taking aspirin in pregnancy and were adherent, with a willingness to take it again in a subsequent pregnancy. We can say this as, comparing findings to other RCTs in pregnancy, of which there are few, the uptake in this RCT was much higher as was adherence (e.g. Chiswick, *et al.* 2015; 35% enrolment and 65-67% adherence with metformin use).<sup>15</sup> This is the first trial of its kind, which has assessed the acceptability of women taking aspirin in low-risk pregnancy and the feasibility of an integrated screening test in a routine clinical setting.

### Strengths and Limitations

The strengths of this study are the multicenter RCT design with robust protocol and oversight and previously published methodology. Allocation bias was limited by use of a prospective approach and selection bias was limited by randomization. The fact that the same two sonographers and biochemists were responsible for conducting the screening test with use of quality control standards for test completion using the same equipment and technique for all subjects optimized reproducibility. There were a low number of dropouts and almost all patient outcomes were recorded. Although there is currently no validated scientific method of assessing aspirin adherence,<sup>16</sup> a laboratory assessment of change in TxB2 served as a more objective assessment, strengthening reliability. There is currently no accepted test in the literature, which can reliably determine aspirin adherence, hence three different methods were used to optimize reliability.<sup>16</sup> Study weaknesses, were primarily that PAPP-A and PLGF analysis was performed in the laboratory using validated methods with quality assurance, as opposed to the bedside point-of-care tests hence it took longer to obtain a result. In a non-research setting with a greater throughput of patients, one could anticipate a



1  
2  
3 faster turnaround time. Additionally the open-label nature of the study meant that safety  
4 recording was open to reporting bias and, as is often the case with RCTs the uptake of  
5 subjects demonstrated dominance for educated women. In RCTs there is always a risk of  
6 introducing a Hawthorne effect, whereby subjects act differently in the confines of an RCT as  
7 to how they would in a real-life setting, hence adherence rates may have been over-  
8 represented.<sup>17</sup> A third trimester visit may have added strength to the study to assess  
9 objectively for aspirin adherence and patient satisfaction, however as adherence prior to 16-  
10 weeks was deemed the critical time point for preeclampsia prevention, follow-up at 20-22  
11 weeks was selected.  
12  
13  
14  
15  
16  
17  
18  
19  
20  
21  
22  
23

### 24 **Interpretation**

25  
26 A recently published large RCT from the FMF found that, following application of FMF  
27 screening and subsequent randomization of women deemed to be at risk of preterm  
28 preeclampsia to aspirin 150mg versus placebo, there was a reduction in the incidence of  
29 preterm preeclampsia in the aspirin arm.<sup>5</sup> Our study differs on several counts; (i) routine  
30 aspirin arm – use of a third arm assessing provision of routine aspirin assessed the  
31 acceptability and feasibility of this policy; (ii) aspirin dosage (150mg vs. 75mg) – in light of  
32 limited evidence on dosage and effect, the safest lowest effective dose was selected; (iii)  
33 adverse events – rates of PPH and vaginal bleeding were reported. This information would  
34 be useful from the FMF study in light of the higher aspirin dosing regime and; (iv) our study  
35 was not powered to detect a difference in clinical outcome, with the primary focus feasibility  
36 and acceptability.  
37  
38  
39  
40  
41  
42  
43  
44  
45  
46  
47  
48  
49  
50  
51

52 Few studies have assessed the acceptability of non-routine medications in pregnancy. In the  
53 developing world, pregnant women are willing to take calcium, oral iron and  
54  
55  
56  
57  
58  
59  
60

1  
2  
3 micronutrients.<sup>18-20</sup> If instructed about potential side-effects and reminded frequently women  
4  
5 had higher levels of adherence with the greatest barrier being forgetfulness. Average  
6  
7 medication adherence in pregnancy for chronic illness is higher than for non-routine  
8  
9 medications at 90-95%,<sup>21</sup> hence it is promising that we have noted a rate as high as this in  
10  
11 our own study. There was a slight discrepancy in adherence assessed via tablet counts and  
12  
13 diary cards and that more objectively assessed via TxB2. Reasons for this may include the  
14  
15 potential for aspirin resistance; which although not formally assessed in this study can be  
16  
17 increased when using an enteric-coated preparation.<sup>22</sup>  
18  
19  
20  
21

22  
23 The FMF screening test was feasible in terms of acquiring first trimester uterine artery  
24  
25 Doppler velocimetry measurements, though delays were encountered in obtaining laboratory  
26  
27 analyzed PAPP-A and PLGF. This is relevant as it reflects the practical aspects of such a  
28  
29 screening test in a clinical real life setting. Improved protocols between the clinical and  
30  
31 laboratory staff would be required to allow patients receive results within a reasonable  
32  
33 timeline.  
34  
35  
36

37  
38 In terms of vaginal spotting and clinically significant PPH with aspirin use, the findings of  
39  
40 this study are comparable with previous studies although evidence of increased antenatal and  
41  
42 postnatal bleeding, requires further investigation, most notably with use of aspirin at doses  
43  
44 greater than 75mg.<sup>23-24</sup> Due to the open-label nature of this study as opposed to placebo  
45  
46 control, there is always a potential of reporting bias of bleeding in the aspirin arms. Although  
47  
48 generally safe in pregnancy, it may be worthwhile considering cessation of aspirin at 32-34  
49  
50 weeks gestation with the aim of reducing the risk of PPH, as opposed to 36-weeks and of  
51  
52 informing women of the unwanted side-effect of increased vaginal spotting.  
53  
54  
55  
56  
57  
58  
59  
60

## Conclusion

It has been proposed that the most cost-effective approach to reducing preeclampsia is the provision of an effective, affordable and safe intervention applied to all mothers without prior testing to assess levels of risk.<sup>7</sup> A algorithm-based screen-and-treat approach, as proposed by the FMF has can reduce rates of pre-term preeclampsia when doses of 150mg of aspirin are used. Our study was not powered to nor did it detect a difference in rates of preeclampsia between groups, yet has taken the first step to address if low-risk nulliparous women are open to taking aspirin in the first instance and if a screening algorithm is feasible. Moving forward, an RCT is required to address the efficacy of universal low dose aspirin in low-risk pregnancy compared to a screening approach. This will require significant numbers due to the low incidence of early-onset preeclampsia. Although women were open to taking aspirin in pregnancy compared to other RCTs involving medication, almost twice the number enrolled had to be approached to obtain adequate study participants. This must be considered when planning a future trial.

1  
2  
3 **COMPETING INTERESTS STATEMENT:** Authors report no conflict of interest  
4  
5

6  
7 **FUNDING STATEMENT:** This work was supported by Perinatal Ireland, HRB and HRB  
8  
9 Mother and Baby Clinical Trials Network.  
10

11  
12  
13 **CONTRIBUTION OF AUTHORSHIP:** (i) Conceived and designed the experiments: FM,  
14  
15 CM, PMcP, FB, PD, DM, MC, AS, FC, JM, SD, JH, AC, ET, PD, ZA, FDM, FMcA; (ii)  
16  
17 Performed the experiments: FM, CM, FC ; (iii) Analyzed the data: FM, PD, ZA, FMcA; (iv)  
18  
19 Contributed reagents/materials/analysis/tools: PMcP, FB, PD, DM, MC, AS, JM, SD, JH,  
20  
21 AC, AH, ET, PD, ZA, FDM, FMcA; (v) Wrote the paper: FM, CM, PMcP, FB, PD, DM,  
22  
23 MC, AS, FC, JM, SD, JH, AC, AH, ET, PD, ZA, FDM, FMcA  
24  
25  
26  
27

28 **ACKNOWLEDGEMENTS:** The women that took part in the study  
29  
30

31  
32  
33 **DATA SHARING STATEMENT:** Dataset available from corresponding author on request  
34  
35  
36  
37  
38  
39  
40  
41  
42  
43  
44  
45  
46  
47  
48  
49  
50  
51  
52  
53  
54  
55  
56  
57  
58  
59  
60

**REFERENCES**

1. Henderson JT, Whitlock EP, O'Connor E, Senger CA, Thompson GH, Rowland MG. Low-dose aspirin for prevention of morbidity and mortality from preeclampsia: A systematic evidence review from the U.S. Preventative Services Task Force. *Ann Intern Med.* 2014; 160: 695-703
2. Sibai BM, Caritis SN, Thom E, Klebanoff M, McNellis D, Rocco L, *et al.* Prevention of preeclampsia with low-dose aspirin in healthy, nulliparous pregnant women. The National Institute of Child Health and Human Development Network of Maternal-Fetal Medicine Units. *N Eng J Med* 1993; 329(17): 1213-8
3. Akolekar R, Syngelaki A, Poon L, Wright D, Nicolaides KH. Competing risks model in early screening for preeclampsia by biophysical and biochemical markers. *Fetal Diagn Ther.* 2013;33(1): 8-15
4. Mone F, Mulcahy C, McParland, McAuliffe FM. Should we recommend universal aspirin for all pregnant women. *Am J Obstet Gynecol.* 2017; 216(2): 141.e1-141.e5
5. Rolnik DL, Wright D, Poon LC, O'Gorman N, Syngelaki A, de Paco Matallaa C, *et al.* Aspirin versus placebo in pregnancies at high risk for preterm preeclampsia. *N Eng J Med* 2017; 377: 613-22
6. O'Gorman N, Wright D, Poon LC, Rolnik DL, Syngelaki A, de Alvarado M, *et al.* Multicenter screening for preeclampsia by maternal factors and biomarkers at 11-13 weeks' gestation: comparison to NICE guidelines and ACOG recommendations. *Ultrasound Obstet Gynecol* 2017; 49(6):756-760

- 1  
2  
3 7. Meads CA, Cnossen JS, Meher S, Juarez-Garcia A, ter Riet G, Duley L, *et al.*  
4  
5 Methods of prediction and prevention of pre-eclampsia: systematic reviews of  
6  
7 accuracy and effectiveness literature with economic modelling. *Health Technol*  
8  
9 *Assess.* 2008;12(6).  
10
- 11  
12 8. Mone F, Mulcahy C, McParland P, *et al.* An open-labeled controlled trial of low dose  
13  
14 aspirin with an early screening test for pre-eclampsia and growth restriction (TEST):  
15  
16 Trial Protocol. *Contemp Clin Trials* 2016; 49: 143-8  
17
- 18  
19 9. NICE. Guideline CG107 : Hypertension in Pregnancy : The management of  
20  
21 hypertensive disorders during pregnancy. National Institute for Health and Clinical  
22  
23 Excellence 2010. (Accessed Sept 5, 2016, at  
24  
25 <https://www.nice.org.uk/guidance/cg107>)  
26
- 27  
28 10. Perneby C, Vahter M, Akesson A, Bremme K, Hjemdahl P. Thromboxane metabolite  
29  
30 excretion during pregnancy – influence of preeclampsia and aspirin treatment.  
31  
32 *Thromb Res* 2011;127(6):605-6  
33
- 34  
35 11. Poon LCY, Zymery NA, Zamprakou A, Syngelaki A, Nicolaides KH. Protocol for  
36  
37 measurement of mean arterial pressure at 11-13 weeks' gestation. *Fetal Diagn Ther.*  
38  
39 2012;31(1):42-48  
40
- 41  
42 12. Bhide A, Acharya G, Bilardo CM, Brezinka C, Cafici D, Hernandez-Andrade E, *et al.*  
43  
44 ISUOG Practice guidelines: use of Doppler ultrasonography in obstetrics. *Ultrasound*  
45  
46 *Obstet Gynecol.* 2013; 41(2), 233-239  
47
- 48  
49 13. International society for the study of hypertension in pregnancy. The classification,  
50  
51 diagnosis and management of the hypertensive disorders of pregnancy: A revised  
52  
53 statement from the ISSHP. *Pregnancy Hypertension: An International Journal of*  
54  
55 *Women's Cardiovascular Health* 2014;4:97-104  
56  
57  
58  
59

- 1  
2  
3 14. Billingham SAM, Whitehead AL, Julious SA. An audit of sample sizes for pilot and  
4  
5 feasibility trials being undertaken in the United Kingdom registered in the United  
6  
7 Kingdom Clinical Research Network database. *BMC Med Res Methodol* 2013;13:104  
8
- 9  
10 15. Chiswick C, Reynolds RM, Denison F, Drake AJ, Forbes S, Newby DE, *et al.* Effect  
11  
12 of metformin on maternal and fetal outcomes in obese pregnant women  
13  
14 (EMPOWaR): a randomised, double-blind, placebo-controlled trial. *Lancet Diabetes*  
15  
16 *Endocrinol* 2015;3(10):778-786
- 17  
18 16. Navaratnam K, Alfirevic A, Alfirevic Z. Low dose aspirin and pregnancy: how  
19  
20 important is aspirin resistance? *BJOG* 2016;123(9):1481-7
- 21  
22 17. McCambridge J, Witton J, Elbourne DR. Systematic review of the Hawthorne effect:  
23  
24 New concepts are needed to study research participation effects. *J Clin Epidemiol*  
25  
26 2014; 67(3): 267-77
- 27  
28 18. Thapa K, Sanghvi H, Rawlins B, Karki YB, Regmi K, Arval S, *et al.* Coverage,  
29  
30 compliance, acceptability and feasibility of a program to prevent pre-eclampsia and  
31  
32 eclampsia through calcium supplementation for pregnant women: an operations  
33  
34 research study in one district of Nepal. *BMC Pregnancy Childbirth.* 2015; 16: 241
- 35  
36 19. Kulkarni B, Christian P, LeClerq SC, Khattry SK. Determinants of compliance to  
37  
38 antenatal micronutrient supplementation and women's perceptions of supplement use  
39  
40 in rural Nepal. *Public Health Nutr.* 2010; 13(1): 82-90
- 41  
42  
43 20. Seck BC and Jackson RT. Determinants of compliance with iron supplementation  
44  
45 among pregnant women in Sengal. *Public Health Nutr.* 2008; 11(6): 596-605
- 46  
47  
48 21. De Jonge L, de Walle HEK, de Jong-van den Berg LTW, van Langen IM, Bakker  
49  
50 MK. Actual Use of Medications Prescribed During Pregnancy: A Cross-Sectional  
51  
52 Study Using Data from a Population-Based Congenital Anomaly Registry. *Drug Saf.*  
53  
54 2015; 38: 737-47
- 55  
56  
57  
58  
59  
60

- 1  
2  
3 22. Caron N, Rivard GE, Michon N, Morin F, Pilon D, Moutquin JM, Rey E. Low dose  
4  
5 ASA response using the PFA-100 in women with high risk pregnancy. *J Obstet*  
6  
7 *Gynaecol Can.* 2009; 31: 1022-7  
8  
9 23. Schisterman EF, Silver RM, Leshner LL, Faraggi D, Wactawski-Wende J, Townsend  
10  
11 JM, *et al.* Preconception low-dose aspirin and pregnancy outcomes: results from the  
12  
13 EAGeR randomised trial. *Lancet.* 2014; 384: 29-36  
14  
15 24. Golding J. A randomised trial of low dose aspirin for primiparae in pregnancy: The  
16  
17 Jamaica Low Dose Aspirin Study Group. *BJOG.* 1998; 105(3): 293-9  
18  
19  
20  
21  
22  
23  
24  
25  
26  
27  
28  
29  
30  
31  
32  
33  
34  
35  
36  
37  
38  
39  
40  
41  
42  
43  
44  
45  
46  
47  
48  
49  
50  
51  
52  
53  
54  
55  
56  
57  
58  
59  
60



**FIGURE LEGENDS**

Figure 1 - Consort diagram

Figure 2 - Histogram demonstrating percentage change in urinary thromboxane-B2 levels pre- and post - aspirin administration (n=147) [TxB2 = urinary-thromboxane level]

For peer review only

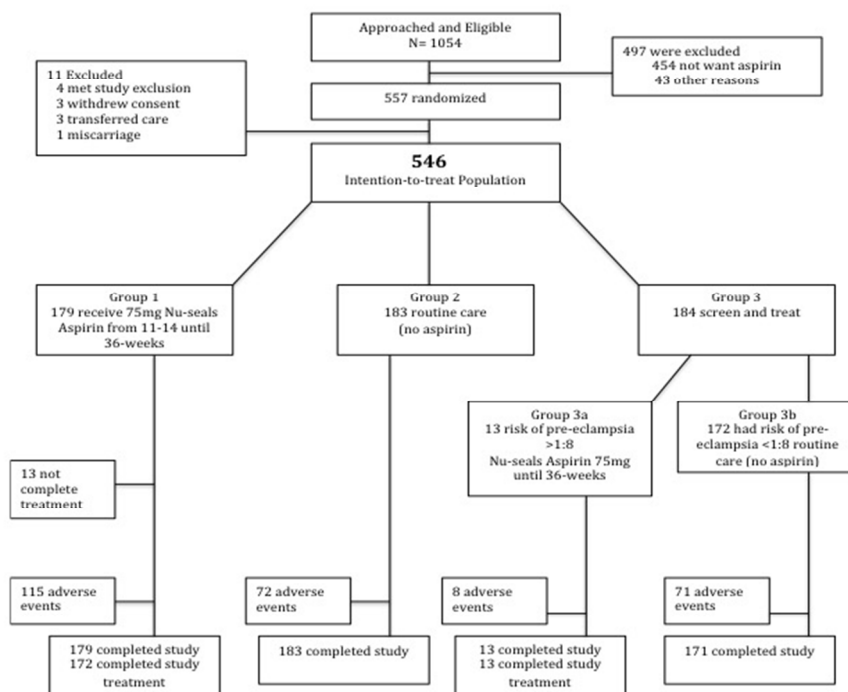

Consort diagram

254x190mm (72 x 72 DPI)

1  
2  
3  
4  
5  
6  
7  
8  
9  
10  
11  
12  
13  
14  
15  
16  
17  
18  
19  
20  
21  
22  
23  
24  
25  
26  
27  
28  
29  
30  
31  
32  
33  
34  
35  
36  
37  
38  
39  
40  
41  
42  
43  
44  
45  
46  
47  
48  
49  
50  
51  
52  
53  
54  
55  
56  
57  
58  
59  
60

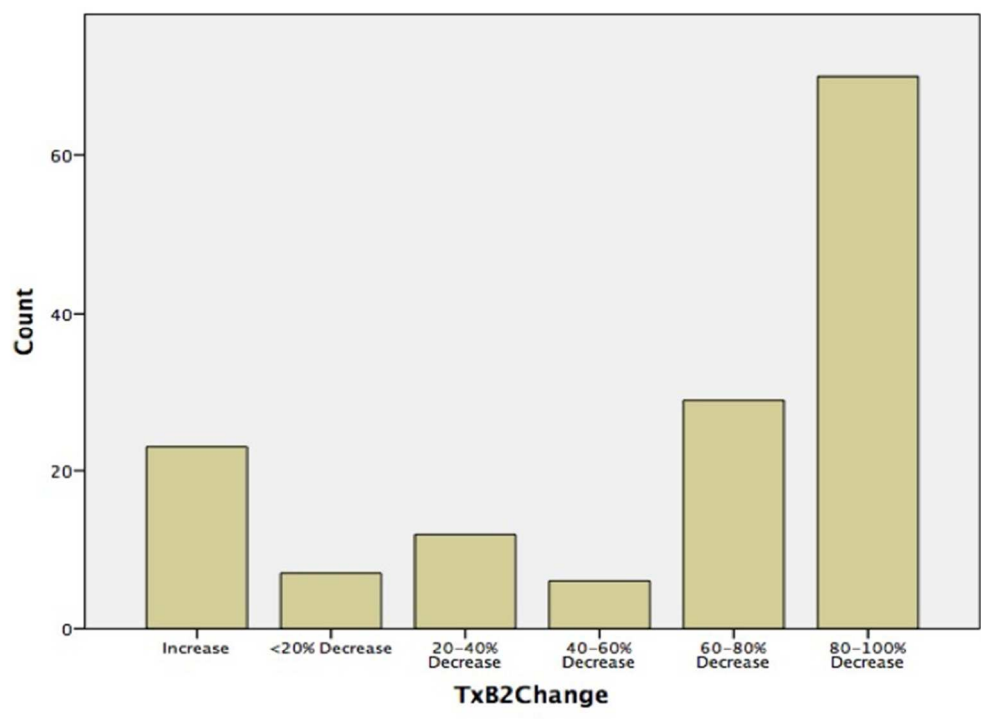

Histogram demonstrating percentage change in urinary thromboxane-B2 levels pre- and post - aspirin administration (n=147) [TxB2 = urinary-thromboxane level]

254x190mm (72 x 72 DPI)

www only

| Outcome                                       | Screen positive;<br>Aspirin<br>Group 3A<br><br>N=13 | Screen negative;<br>No Aspirin<br>Group 3B<br><br>N=171 | p-value |
|-----------------------------------------------|-----------------------------------------------------|---------------------------------------------------------|---------|
| Preeclampsia No. (%)                          | 2 (15.4)                                            | 5 (2.9)                                                 | 0.13    |
| Pre-eclampsia <34-weeks                       | 0 (0)                                               | 2 (1.2)                                                 | 0.70    |
| Pre-eclampsia <37-weeks                       | 2 (15.4)                                            | 2 (1.2)                                                 | 0.02    |
| Birthweight <10 <sup>th</sup> centile No. (%) | 4 (30.7)                                            | 21 (12.3)                                               | 0.15    |
| Pre-term delivery <34 weeks No. (%)           | 1 (7.7)                                             | 1 (0.6)                                                 | 0.32    |
| NICU admission No. (%)                        | 0 (0)                                               | 9 (5.3)                                                 | 0.86    |
| Outcome No. (%)                               |                                                     |                                                         |         |
| Alive at 6-weeks                              | 13 (100)                                            | 169 (98.8)                                              | 0.70    |
| Stillbirth                                    | 0 (0)                                               | 2 (1.2)                                                 | 0.70    |
| Neonatal death                                | 0 (0)                                               | 0 (0)                                                   | --      |

Table S1 - Secondary outcome measures in Group 3 (screen and treat)

(Expressed as average and standard deviation unless otherwise stated)

| Adverse/Serious Adverse Event   | Low dose Aspirin<br>Group 1<br>N=179 | No-aspirin<br>Group 2<br>N=183 | Screen and treat<br>Group 3<br>N=184 | p-value |
|---------------------------------|--------------------------------------|--------------------------------|--------------------------------------|---------|
| Adverse events                  |                                      |                                |                                      |         |
| Vaginal spotting No. (%)*       | 27 (15.1)                            | 18 (9.8)                       | 12 (6.5)                             | 0.03    |
| Post-partum haemorrhage No. (%) |                                      |                                |                                      |         |
| >500mls*                        | 25 (13.0)                            | 9 (4.9)                        | 12 (6.5)                             | 0.004   |
| >1000mls                        | 7 (3.6%)                             | 1 (0.5)                        | 4 (2.2)                              | 0.073   |
| Serious Adverse Events          |                                      |                                |                                      |         |
| NICU admission                  | 9 (5.0)                              | 7 (3.8)                        | 9 (4.9)                              | 0.83    |
| Perinatal Death                 | 2 (1.1)                              | 2 (1.1)                        | 2 (1.1)                              | 0.99    |
| Maternal admission              | 18 (10.1)                            | 15 (8.2)                       | 14 (7.6)                             | 0.69    |
| Congenital anomaly              | 3 (1.7)                              | 4 (2.2)                        | 3 (1.6)                              | 0.91    |
| Total serious adverse events    | 32 (17.8)                            | 28 (15.3)                      | 28 (15.2)                            | 0.74    |

Table S2 – Adverse and serious adverse events in all three groups. There may be >1 adverse event or serious adverse event per subject \* (p<0.05)

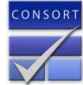

## CONSORT 2010 checklist of information to include when reporting a randomised trial\*

| Section/Topic                    | Item No | Checklist item                                                                                                                                                                              | Reported on page No |
|----------------------------------|---------|---------------------------------------------------------------------------------------------------------------------------------------------------------------------------------------------|---------------------|
| <b>Title and abstract</b>        |         |                                                                                                                                                                                             |                     |
|                                  | 1a      | Identification as a randomised trial in the title                                                                                                                                           | 1                   |
|                                  | 1b      | Structured summary of trial design, methods, results, and conclusions (for specific guidance see CONSORT for abstracts)                                                                     | 3                   |
| <b>Introduction</b>              |         |                                                                                                                                                                                             |                     |
| Background and objectives        | 2a      | Scientific background and explanation of rationale                                                                                                                                          | 5                   |
|                                  | 2b      | Specific objectives or hypotheses                                                                                                                                                           | 5                   |
| <b>Methods</b>                   |         |                                                                                                                                                                                             |                     |
| Trial design                     | 3a      | Description of trial design (such as parallel, factorial) including allocation ratio                                                                                                        | 7                   |
|                                  | 3b      | Important changes to methods after trial commencement (such as eligibility criteria), with reasons                                                                                          | N/A                 |
| Participants                     | 4a      | Eligibility criteria for participants                                                                                                                                                       | 6                   |
|                                  | 4b      | Settings and locations where the data were collected                                                                                                                                        | 6                   |
| Interventions                    | 5       | The interventions for each group with sufficient details to allow replication, including how and when they were actually administered                                                       | 7                   |
| Outcomes                         | 6a      | Completely defined pre-specified primary and secondary outcome measures, including how and when they were assessed                                                                          | 9                   |
|                                  | 6b      | Any changes to trial outcomes after the trial commenced, with reasons                                                                                                                       | N/A                 |
| Sample size                      | 7a      | How sample size was determined                                                                                                                                                              | 10                  |
|                                  | 7b      | When applicable, explanation of any interim analyses and stopping guidelines                                                                                                                | N/A                 |
| <b>Randomisation:</b>            |         |                                                                                                                                                                                             |                     |
| Sequence generation              | 8a      | Method used to generate the random allocation sequence                                                                                                                                      | 7                   |
|                                  | 8b      | Type of randomisation; details of any restriction (such as blocking and block size)                                                                                                         | 7                   |
| Allocation concealment mechanism | 9       | Mechanism used to implement the random allocation sequence (such as sequentially numbered containers), describing any steps taken to conceal the sequence until interventions were assigned | 7                   |
| Implementation                   | 10      | Who generated the random allocation sequence, who enrolled participants, and who assigned participants to interventions                                                                     | 7                   |
| Blinding                         | 11a     | If done, who was blinded after assignment to interventions (for example, participants, care providers, those                                                                                | N/A                 |

|    |                          |                                                                                                                     |            |
|----|--------------------------|---------------------------------------------------------------------------------------------------------------------|------------|
| 1  |                          |                                                                                                                     |            |
| 2  |                          | assessing outcomes) and how                                                                                         |            |
| 3  |                          |                                                                                                                     |            |
| 4  |                          | 11b If relevant, description of the similarity of interventions                                                     | N/A        |
| 5  | Statistical methods      | 12a Statistical methods used to compare groups for primary and secondary outcomes                                   | 10         |
| 6  |                          | 12b Methods for additional analyses, such as subgroup analyses and adjusted analyses                                | 10         |
| 7  |                          |                                                                                                                     |            |
| 8  | <b>Results</b>           |                                                                                                                     |            |
| 9  | Participant flow (a      | 13a For each group, the numbers of participants who were randomly assigned, received intended treatment, and        | 12 & Fig 1 |
| 10 | diagram is strongly      | were analysed for the primary outcome                                                                               |            |
| 11 | recommended)             | 13b For each group, losses and exclusions after randomisation, together with reasons                                | Fig 1      |
| 12 | Recruitment              | 14a Dates defining the periods of recruitment and follow-up                                                         | 12         |
| 13 |                          | 14b Why the trial ended or was stopped                                                                              | 12         |
| 14 | Baseline data            | 15 A table showing baseline demographic and clinical characteristics for each group                                 | 13         |
| 15 | Numbers analysed         | 16 For each group, number of participants (denominator) included in each analysis and whether the analysis was      | 12 & Fig 1 |
| 16 |                          | by original assigned groups                                                                                         |            |
| 17 |                          |                                                                                                                     |            |
| 18 | Outcomes and             | 17a For each primary and secondary outcome, results for each group, and the estimated effect size and its           | 17 and 19  |
| 19 | estimation               | precision (such as 95% confidence interval)                                                                         |            |
| 20 |                          | 17b For binary outcomes, presentation of both absolute and relative effect sizes is recommended                     | NA         |
| 21 | Ancillary analyses       | 18 Results of any other analyses performed, including subgroup analyses and adjusted analyses, distinguishing       | NA         |
| 22 |                          | pre-specified from exploratory                                                                                      |            |
| 23 |                          |                                                                                                                     |            |
| 24 | Harms                    | 19 All important harms or unintended effects in each group (for specific guidance see CONSORT for harms)            | 18         |
| 25 |                          |                                                                                                                     |            |
| 26 | <b>Discussion</b>        |                                                                                                                     |            |
| 27 | Limitations              | 20 Trial limitations, addressing sources of potential bias, imprecision, and, if relevant, multiplicity of analyses | 21         |
| 28 | Generalisability         | 21 Generalisability (external validity, applicability) of the trial findings                                        | 20         |
| 29 | Interpretation           | 22 Interpretation consistent with results, balancing benefits and harms, and considering other relevant evidence    | 22         |
| 30 |                          |                                                                                                                     |            |
| 31 | <b>Other information</b> |                                                                                                                     |            |
| 32 | Registration             | 23 Registration number and name of trial registry                                                                   | 6          |
| 33 | Protocol                 | 24 Where the full trial protocol can be accessed, if available                                                      | 6          |
| 34 | Funding                  | 25 Sources of funding and other support (such as supply of drugs), role of funders                                  | 6          |
| 35 |                          |                                                                                                                     |            |

36

37 \*We strongly recommend reading this statement in conjunction with the CONSORT 2010 Explanation and Elaboration for important clarifications on all the items. If relevant, we also

38 recommend reading CONSORT extensions for cluster randomised trials, non-inferiority and equivalence trials, non-pharmacological treatments, herbal interventions, and pragmatic trials.

39 Additional extensions are forthcoming: for those and for up to date references relevant to this checklist, see [www.consort-statement.org](http://www.consort-statement.org).

40

41

# BMJ Open

## Trial of feasibility and acceptability of routine low dose aspirin versus Early Screening Test indicated aspirin for preeclampsia prevention [TEST Study] – A multicenter randomised controlled trial

|                                 |                                                                                                                                                                                                                                                                                                                                                                                                                                                                                                                                                                                                                                                                                                                                                                                                                                                                                                                                                                                                                                                                                                                                                                                                                                                                                                                                                                                                                                                                                                                                                                                                                                                                                   |
|---------------------------------|-----------------------------------------------------------------------------------------------------------------------------------------------------------------------------------------------------------------------------------------------------------------------------------------------------------------------------------------------------------------------------------------------------------------------------------------------------------------------------------------------------------------------------------------------------------------------------------------------------------------------------------------------------------------------------------------------------------------------------------------------------------------------------------------------------------------------------------------------------------------------------------------------------------------------------------------------------------------------------------------------------------------------------------------------------------------------------------------------------------------------------------------------------------------------------------------------------------------------------------------------------------------------------------------------------------------------------------------------------------------------------------------------------------------------------------------------------------------------------------------------------------------------------------------------------------------------------------------------------------------------------------------------------------------------------------|
| Journal:                        | <i>BMJ Open</i>                                                                                                                                                                                                                                                                                                                                                                                                                                                                                                                                                                                                                                                                                                                                                                                                                                                                                                                                                                                                                                                                                                                                                                                                                                                                                                                                                                                                                                                                                                                                                                                                                                                                   |
| Manuscript ID                   | bmjopen-2018-022056.R1                                                                                                                                                                                                                                                                                                                                                                                                                                                                                                                                                                                                                                                                                                                                                                                                                                                                                                                                                                                                                                                                                                                                                                                                                                                                                                                                                                                                                                                                                                                                                                                                                                                            |
| Article Type:                   | Research                                                                                                                                                                                                                                                                                                                                                                                                                                                                                                                                                                                                                                                                                                                                                                                                                                                                                                                                                                                                                                                                                                                                                                                                                                                                                                                                                                                                                                                                                                                                                                                                                                                                          |
| Date Submitted by the Author:   | 29-Mar-2018                                                                                                                                                                                                                                                                                                                                                                                                                                                                                                                                                                                                                                                                                                                                                                                                                                                                                                                                                                                                                                                                                                                                                                                                                                                                                                                                                                                                                                                                                                                                                                                                                                                                       |
| Complete List of Authors:       | Mone, Fionnuala; UCD Perinatal Research Centre, Obstetrics and Gynaecology, School of Medicine, University College Dublin, Mulcahy, Cecilia; UCD Perinatal Research Centre, Obstetrics and Gynaecology, School of Medicine, University College Dublin McParland, Peter; UCD Perinatal Research Centre, Obstetrics and Gynaecology, School of Medicine, University College Dublin Brethnach, FIONNUALA; Royal College of Surgeons in Ireland Downey, Paul; Department of Pathology and Laboratory Medicine, National Maternity Hospital McCormack, Dorothy; Department of Pharmacy, National Maternity Hospital Culliton, Marie; Department of Pathology and Laboratory Medicine, National Maternity Hospital Staunton, Alice; Royal College of Surgeons in Ireland Cody, Fiona; Royal College of Surgeons in Ireland Morrison, John; National University of Ireland Galway, Obstetrics and Gynaecology Daly, Sean; Coombe Women and Infants University Hospital, Obstetrics and Gynaecology Higgins, John; Department of Obstetrics and Gynaecology, University College Cork Cotter, Amanda; Department of Obstetrics and Gynaecology, Graduate Entry Medical School, University of Limerick Hunter, Alyson; Royal Maternity Hospital, Grosvenor Road, BT12 6BB Tully, Elizabeth; Royal College of Surgeons in Ireland, Perinatal Ireland Dicker, Patrick; Perinatal Ireland Alfirevic, Zarko; University of Liverpool, Department of Women's and Children's Health Malone, Fergal; Royal College of Surgeons in Ireland, Obstetrics and Gynaecology McAuliffe, Fionnuala; University College Dublin, School of Medicine; National Maternity Hospital, Obstetrics and Gynaecology |
| <b>Primary Subject Heading</b>: | Obstetrics and gynaecology                                                                                                                                                                                                                                                                                                                                                                                                                                                                                                                                                                                                                                                                                                                                                                                                                                                                                                                                                                                                                                                                                                                                                                                                                                                                                                                                                                                                                                                                                                                                                                                                                                                        |
| Secondary Subject Heading:      | Health policy                                                                                                                                                                                                                                                                                                                                                                                                                                                                                                                                                                                                                                                                                                                                                                                                                                                                                                                                                                                                                                                                                                                                                                                                                                                                                                                                                                                                                                                                                                                                                                                                                                                                     |
| Keywords:                       | preeclampsia, screening, aspirin, feasibility, low risk                                                                                                                                                                                                                                                                                                                                                                                                                                                                                                                                                                                                                                                                                                                                                                                                                                                                                                                                                                                                                                                                                                                                                                                                                                                                                                                                                                                                                                                                                                                                                                                                                           |



1  
2  
3  
4  
5  
6  
7  
8  
9  
10  
11  
12  
13  
14  
15  
16  
17  
18  
19  
20  
21  
22  
23  
24  
25  
26  
27  
28  
29  
30  
31  
32  
33  
34  
35  
36  
37  
38  
39  
40  
41  
42  
43  
44  
45  
46  
47  
48  
49  
50  
51  
52  
53  
54  
55  
56  
57  
58  
59  
60

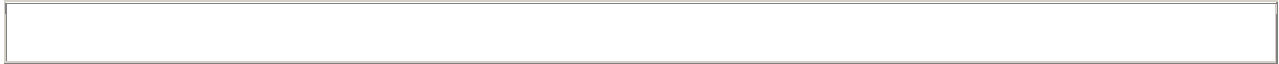

SCHOLARONE™  
Manuscripts

For peer review only

**TITLE:** Trial of feasibility and acceptability of routine low dose aspirin versus Early Screening Test indicated aspirin for preeclampsia prevention [**TEST** Study] – A multicenter randomised controlled trial

**AUTHORS:** Fionnuala MONE<sup>1</sup>, Ms. Cecilia MULCAHY<sup>1</sup>, Peter McPARLAND<sup>1</sup>, Fionnuala BREATHNACH<sup>2</sup>, Paul DOWNEY<sup>3</sup>, Ms. Dorothy MCCORMACK<sup>4</sup>, Ms. Marie CULLITON<sup>3</sup>, Alice STANTON<sup>5</sup>, Ms. Fiona CODY<sup>2</sup>, John MORRISON<sup>6</sup>, Sean DALY<sup>7</sup>, John HIGGINS<sup>8</sup>, Amanda COTTER<sup>9</sup>, Alyson HUNTER<sup>10</sup>, Elizabeth TULLY<sup>2</sup>, Patrick DICKER<sup>2</sup>, Zarko ALFIREVIC<sup>11</sup>, Fergal D MALONE<sup>2</sup>, Fionnuala M McAULIFFE<sup>1\*</sup>

**AFFILIATIONS:**

1. UCD Perinatal Research Centre, School of Medicine, University College Dublin, National Maternity Hospital, Dublin, Ireland. 2. Department of Obstetrics and Gynaecology, Royal College of Surgeons in Ireland, Rotunda Hospital, Parnell Square, Dublin 1, Ireland. 3. Department of Pathology and Laboratory Medicine, National Maternity Hospital, Holles St, Dublin 2, Ireland. 4. Department of Pharmacy, National Maternity Hospital, Holles St, Dublin 2, Ireland. 5. Molecular and Cellular Therapeutics, Royal College of Surgeons in Ireland, Dublin 2, Ireland. 6. Department of Obstetrics and Gynaecology, National University of Ireland, Galway, Ireland. 7. Department of Obstetrics and Gynaecology, Coombe Women's and Infant's University Hospital, Dublin 8, Ireland. 8. Department of Obstetrics and Gynaecology, University College Cork, Cork, Ireland. 9. Department of Obstetrics and Gynaecology, Graduate Entry Medical School, University of Limerick, Limerick, Ireland. 10. Royal Jubilee Maternity Hospital, Belfast, UK. 11. Department of women's and Children's Health, Institute of Translational Medicine, University of Liverpool, Liverpool, UK

\*Corresponding author: Prof FM McAuliffe. UCD Perinatal Research Centre, School of Medicine, University College Dublin, National Maternity Hospital, Dublin, Ireland. T:+353 1 6373216 E: [Fionnuala.mcauliffe@ucd.ie](mailto:Fionnuala.mcauliffe@ucd.ie)

**WORD Count:** 3, 927 words

## ABSTRACT

**Objective:** Evaluate feasibility and acceptability of routine aspirin in low-risk women, compared to screening-test indicated aspirin for prevention of preeclampsia and fetal growth restriction (FGR) prevention.

**Design:** Multicentre open-label feasibility randomised controlled trial.

**Setting:** Two tertiary maternity hospitals in Dublin, Ireland.

**Participants:** 546 low-risk nulliparous women completed the study

**Interventions:** Women underwent computerised randomisation to; Group 1- routine aspirin 75mg from 11 until 36 weeks; Group 2 - no aspirin; and Group 3 - aspirin based on the Fetal Medicine Foundation screening test.

**Primary and secondary outcome measures:** (a) proportion agreeing to participate; (b) compliance with protocol; (c) proportion where first trimester uterine artery Doppler was obtainable and; (iv) time taken to issue screening result. Secondary outcomes included rates of preeclampsia and small-for-gestational age fetuses.

**Results:** 546 were included in the routine aspirin (n=179), no aspirin (n=183) and screen and treat (n=184) groups. 546 of 1054 approached (51.8%), enrolled. Average aspirin adherence was 90%. Uterine artery Doppler was obtained in 98.4% (181/184) and average time to obtain a screening result was 7.6 (0-26) days. Of those taking aspirin, vaginal spotting was greater; n=29 (15.1%), non-aspirin n=28 (7.9%) OR 2.1 (95% CI 1.2-3.6). Post-partum haemorrhage > 500mls was also greater; aspirin n=26 (13.5%), no aspirin n=20 (5.6%) OR 2.6 (95% CI 1.4-4.8).

1  
2  
3 **Conclusion:** Low-risk nulliparous women are open to taking aspirin in pregnancy and had  
4 high levels of adherence. Aspirin use was associated with greater rates of vaginal bleeding.  
5  
6 An appropriately powered randomized controlled trial is now required to address the efficacy  
7 and safety of universal low dose aspirin in low-risk pregnancy compared to a screening  
8 approach.  
9  
10  
11  
12

13 **Trial Registration:** [www.isrctn.com/ISRCTN15191778](http://www.isrctn.com/ISRCTN15191778)  
14

15 **Funding:** Perinatal Ireland, HRB and the Mother and Baby Clinical Trials Network, HRB  
16  
17

## 18 **ARTICLE SUMMARY**

19

20 Strengths and limitations of this study  
21  
22

- 23 • Robust multi-centre randomised controlled trial design
- 24
- 25 • Three methods were used to assess aspirin adherence
- 26
- 27 • Standardisation of methods
- 28
- 29 • Potential introduction of reporting bias through open-label design
- 30
- 31
- 32
- 33
- 34
- 35
- 36
- 37
- 38
- 39
- 40
- 41
- 42
- 43
- 44
- 45
- 46
- 47
- 48
- 49
- 50
- 51
- 52
- 53
- 54
- 55
- 56
- 57
- 58
- 59
- 60

## INTRODUCTION

Low dose aspirin use prior to 16-weeks can reduce the incidence of preeclampsia in at-risk pregnancies. When commenced at this stage, at a dose of 75mg, its efficacy in low-risk pregnancies is unknown.<sup>1,2</sup> With the emergence of first trimester screening tests for preeclampsia such as that of the Fetal Medicine Foundation (FMF), one can predict from 11-weeks, the risk of preeclampsia.<sup>3</sup> Internationally, there are conflicting consensus statements on screening methods and which women meet criteria for aspirin use.<sup>4</sup> Application of the FMF screening test and provision of low dose aspirin to screen positive women can significantly reduce the incidence of early-onset preeclampsia (4.3% aspirin vs. 1.6% placebo  $p=0.004$ ), although predictive performance of the algorithm appears to vary between populations.<sup>5</sup> It has been proposed that performance of the FMF algorithm is superior to the methods recommended by the National Institute of Clinical Excellence and American College of Obstetricians and Gynecologists (ACOG).<sup>6</sup> It may be more efficacious to prescribe low dose aspirin universally, although there is no evidence to support such a policy as yet.<sup>7</sup> To determine this, one must first evaluate if low-risk women are willing to take aspirin in pregnancy and if undergoing a comprehensive screening test is realistic in the routine setting. Hence, the primary objective of this multi-center open label feasibility randomised controlled trial was to evaluate the acceptability and feasibility of women taking aspirin 75mg from beyond 11-weeks gestation versus screening test-indicated aspirin. Secondary outcomes included rates of; (i) preeclampsia; (ii) small-for-gestational age infants; (iii) pre-term delivery; (iv) admission to neonatal intensive care; (v) placental abruption; (vi) any reported death and; (vii) acceptability of women taking aspirin routinely versus test indicated aspirin, assessed by a questionnaire.

1  
2  
3  
4  
5  
6  
7  
8  
9  
10  
11  
12  
13  
14  
15  
16  
17  
18  
19  
20  
21  
22  
23  
24  
25  
26  
27  
28  
29  
30  
31  
32  
33  
34  
35  
36  
37  
38  
39  
40  
41  
42  
43  
44  
45  
46  
47  
48  
49  
50  
51  
52  
53  
54  
55  
56  
57  
58  
59  
60

For peer review only

## METHODS

### Study Design

This open-label feasibility multicenter randomised controlled trial (RCT) was performed in two Irish tertiary maternity hospitals with 18,000 deliveries per annum. The aim was to include three centers, however there was a delay in the local ethics committee decision for the third center (subsequently approved), which was excluded in the interests of study schedule. The protocol for this multicenter randomised controlled trial has been published<sup>8</sup> and was prospectively authorized by the Health Products Regulatory Authority and National Maternity Hospital Central Ethics Committee. The trial was registered with the ISRCTN number 15191778 and was supported by Perinatal Ireland HRB and the HRB Mother and Baby Clinical Trials Network following external peer review for scientific quality. The funder of the study had no role in study design, data collection, data analysis, data interpretation, or writing of the manuscript. An independent Trial Steering Committee and Data Monitoring Committee met quarterly to oversee the safety of the trial participants.

Nulliparous women over 18-years-old between 11 to 13+6 weeks gestation with a viable singleton pregnancy that didn't meet criteria for aspirin commencement based upon major preeclampsia risk factors (chronic kidney disease, autoimmune disease e.g. systemic lupus erythematosus, diabetes mellitus and chronic hypertension) were eligible for inclusion and thus were recruited at antenatal booking clinics selected at random.<sup>9</sup> In Ireland it is currently not routine obstetric practice to commence aspirin in women that do not have an aforementioned major risk factor for pre-eclampsia as defined by the National Institute of Health and Clinical Excellence.<sup>9</sup> Exclusion criteria included participants already taking part in a clinical trial, co-existence of fetal congenital anomaly at recruitment or those with aspirin hypersensitivity. All participants provided written informed consent and were recruited by

1  
2  
3 the research clinician at the first trimester antenatal booking visit.  
4  
5  
6  
7  
8  
9  
10  
11  
12  
13  
14  
15  
16  
17  
18  
19  
20  
21  
22  
23  
24  
25  
26  
27  
28  
29  
30  
31  
32  
33  
34  
35  
36  
37  
38  
39  
40  
41  
42  
43  
44  
45  
46  
47  
48  
49  
50  
51  
52  
53  
54  
55  
56  
57  
58  
59  
60

For peer review only



### **Randomization**

Participants underwent enrollment and online computerized randomization by the study sonographer or clinician based on blocks of six to; Group 1 - aspirin 75mg from 11 to 13+6 weeks once daily until 36-weeks' gestation; Group 2 - no aspirin and; Group 3 - aspirin depending on the result of the FMF screening test. Subjects in non-aspirin taking groups had routine antenatal care. The randomisation sequence was determined prior to study commencement by the off-site statistician and was concealed from assessors, with both the assessor and participant seeing the group allocation at the same time, following online selection.

### **Intervention**

Enteric coated Nu-Seals Aspirin (Acetylsalicylic Acid) 75mg orally once daily at night from 11 to 36-weeks gestation was provided free of charge from Alliance Pharma®, which were independent of study protocol and analysis. A dose of 75mg was used as this is currently the standard recommended dosage in the UK and Ireland for at-risk women.<sup>9</sup> Aspirin adherence was assessed subjectively via patient reported diary cards and tablet counts (checked by research clinician and pharmacist) and objectively via assessment of change in urinary 11-dehydrothromboxane-B2 (TxB2). Any reduction in TxB2 between first (pre-aspirin) and second trimester (post-aspirin) levels was taken to suggest that a subject had ingested aspirin within the last ten days.<sup>10</sup>

### **Baseline review and follow-up**

Participants underwent two scheduled study visits, at study recruitment and at 20-22 weeks (to coincide with their fetal anatomy scan which was performed at the same time) with diary cards and aspirin tablets returned to the research team at 36-weeks gestation. Participants

1  
2  
3 completed an anonymous questionnaire at 20-22 weeks based on acceptability of taking  
4 aspirin in pregnancy.  
5

6  
7 Study assessments at the time of the recruitment visit included the FMF screening test, the  
8 results of which were assessed for those in Group 3 (screen positive and received aspirin (3A)  
9 and screen negative no aspirin (3B)). The FMF screening test was not routine practice within  
10 Ireland. Components of the screening test included; maternal history (including ovulation  
11 induced conception, race, body mass index, age, mother with preeclampsia); mean arterial  
12 blood pressure (MAP); uterine artery Doppler pulsatility index; and pregnancy associated  
13 plasma protein-A (PAPP-A) and placental like growth factor (PLGF) multiples of the  
14 median. To determine risk of preeclampsia, the FMF algorithm was used and based upon a  
15 screen positive rate of 5%, a cut off for preeclampsia prior to 42-weeks at greater than 1:8  
16 was used.<sup>3</sup> This cut-off was selected with the aim of capturing the majority of pre-eclamptics;  
17 both pre and post-term and at the time of study commencement this was the optimal  
18 screening algorithm for detection of any preeclampsia. Two un-blinded trained clinical  
19 research sonographers performed the first trimester uterine artery Doppler waveforms and  
20 MAP and interpreted findings. MAP was assessed using an automated blood pressure  
21 monitoring device as outlined by the technique stipulated by the FMF.<sup>11</sup> Uterine artery  
22 Doppler velocimetry was obtained using Viewpoint® Version 5.6.16 GE Healthcare, 2012  
23 and Voluson Expert 730®, GE 2012 using the technique outlined from by the International  
24 Society of Ultrasound in Obstetrics and Gynecology. The pulsatility index was measured  
25 from both uterine arteries and an average value was calculated.<sup>12</sup>  
26  
27  
28  
29  
30  
31  
32  
33  
34  
35  
36  
37  
38  
39  
40  
41  
42  
43  
44  
45  
46  
47  
48  
49

50 A maternal blood sample was analyzed for PAPP-A and PLGF under standard conditions  
51 using a 6000 DELFIA® Xpress, PerkinElmer, 2014 clinical random access screening  
52 platform in the hospital clinical biochemistry laboratory. A quantitative immunoturbidimetric  
53  
54  
55  
56  
57  
58  
59  
60

1  
2  
3 TxBCardio® immunoassay was used to determine TxB2 levels in urine samples obtained  
4 both study visits. These were then standardized as a ratio with creatinine levels and  
5 expressed as pg/mg creatinine.  
6  
7  
8  
9

## 10 11 **Outcomes**

12  
13 The primary objective of this study was to evaluate the feasibility and acceptability of low-  
14 risk nulliparous women taking aspirin versus test indicated aspirin in pregnancy. Outcome  
15 measures included:  
16  
17  
18

- 19  
20 (i) The proportion of eligible women agreeing to participate in a trial where aspirin is  
21 prescribed routinely (feasibility);  
22
- 23  
24 (ii) Compliance with study protocol, as measured by the following: (a) adherence to  
25 aspirin (acceptability), (b) attendance at study visits (acceptability), (c)  
26 satisfactory collection of all endpoints and variables (feasibility), (d) specific  
27 study protocol violations (feasibility);  
28  
29
- 30  
31 (iii) The proportion of women in whom it was possible to obtain first trimester trans-  
32 abdominal uterine artery Doppler velocimetry examination (feasibility);  
33  
34
- 35  
36 (iv) Proportion of women with a completed screening test who were issued the  
37 screening result within one week of having the test performed (feasibility);  
38  
39  
40  
41  
42  
43

44 Secondary outcomes included rates of; (i) preeclampsia; (ii) small-for-gestational-age (SGA)  
45 infants (customised sex-specific birth-weight <10<sup>th</sup> centile); (iii) pre-term delivery prior to  
46 34-weeks; (iv) admission to neonatal intensive care unit (NICU); (v) placental abruption; (vi)  
47 any reported death (stillbirth, neonatal or infant death) and; (vii) acceptability of women  
48 taking aspirin routinely versus test indicated aspirin as assessed by an anonymous  
49 questionnaire at 20-22 weeks. As part of routine antenatal care women had an appointment  
50  
51  
52  
53  
54  
55  
56  
57  
58  
59  
60

1  
2  
3 with their midwife and or clinician at booking (11-14 weeks), 16-weeks, 18-20 weeks, 25-  
4 weeks, 28-weeks, 31-weeks, 34-weeks, 36-weeks, 28-weeks, 40-weeks and 41-weeks  
5 gestation in line with hospital protocol. At each visit blood pressure was assessed using  
6 mercury sphygmomanometry and a urine dipstick for proteinuria was performed with  
7 symphysio-fundal-height and or fetal biometrical ultrasound assessment as appropriate. -  
8 was defined based upon the definition from the ISSHP with new onset hypertension  
9 ( $>140\text{mmHg}$  systolic or  $>90\text{mmHg}$  diastolic) after 20-weeks gestation associated with; (i)  
10 proteinuria of at least  $1\text{g/L}$  [2+] on urine dipstick testing, and or; (ii) maternal organ  
11 dysfunction ; an or fetal growth restriction.<sup>13</sup> Suspicion of a diagnosis of pre-eclampsia at an  
12 antenatal visit prompted further investigation in the fetal assessment unit with clinical  
13 examination, blood testing (urea and creatinine, liver function tests and full blood picture),  
14 24-hour urine collection for proteinuria and departmental fetal ultrasound assessment with  
15 final diagnosis made by an obstetrician.  
16  
17  
18  
19  
20  
21  
22  
23  
24  
25  
26  
27  
28  
29  
30  
31  
32

33 Safety data were reported as adverse and serious adverse events and participants discontinued  
34 from the study were recorded in addition to the reason for discontinuation and outcome. As  
35 an assessment of post-partum haemorrhage, blood loss was weighed at time of delivery.  
36  
37  
38  
39  
40  
41

### 42 **Statistical Analysis**

43 As outlined in the published study protocol, the projected sample size for this study was 500  
44 women across two sites with 18,000 deliveries per annum.<sup>8</sup> To determine preeclampsia as a  
45 primary outcome; the anticipated number of patients required is over 15,000 women. As this  
46 study aimed to determine the feasibility of such a study, 500 participants were more than  
47 adequate as 3% of the number required for a substantive study is required ( $n=450$ ).<sup>14</sup>  
48 Accounting for a drop-out rate of 10% ( $n=45$ ), 500 participants were adequate to obtain the  
49  
50  
51  
52  
53  
54  
55  
56  
57  
58  
59  
60

1  
2  
3 primary outcome. Analysis was performed by a statistician using SAS v.20 on the intention-  
4 to-treat (ITT) population, which included all participants randomised, which completed the  
5 full second trimester assessment. Measures of variance included standard deviation. Follow-  
6 up of serious adverse events continued until 28-days following delivery. Adverse events were  
7 reported as odds ratios (OR). To assess secondary outcomes and safety, comparisons of  
8 groups were be performed using two sample t-tests, Wilcoxon Rank-sum tests and Chi-square  
9 tests.  
10  
11  
12  
13  
14  
15  
16  
17  
18  
19  
20  
21  
22  
23  
24  
25  
26  
27  
28  
29  
30  
31  
32  
33  
34  
35  
36  
37  
38  
39  
40  
41  
42  
43  
44  
45  
46  
47  
48  
49  
50  
51  
52  
53  
54  
55  
56  
57  
58  
59  
60

## Patient Involvement

Although patients were not directly involved in devising the study protocol and design the burden of the RCT intervention (i.e. taking aspirin and undergoing the FMF screening test) was assessed by means of an anonymous questionnaire completed at 20-22 weeks gestation. At the time of study participation subjects were informed that study results could be viewed following publication on the study website; <http://perinatalireland.ie/research/test/>

## RESULTS

Subjects were recruited between 8<sup>th</sup> May 2014 to 23<sup>rd</sup> September 2015 with follow-up of participants until 11<sup>th</sup> April 2016, when the study was ended by the steering committee following delivery of the final patient as the target sample size had been achieved. In total 1054 eligible women were approached to take part in the study and of these, 557 underwent randomization [Figure 1]. In the screen and treat population (Group 3) n=184, 13 (7.1%) women had a risk of developing preeclampsia >1:8 and subsequently commenced aspirin until 36-weeks gestation. Eleven women were excluded from the study leaving 546 in the ITT population. In total there were 192 women in the ITT group that were taking aspirin as per randomization and 354 not taking aspirin [Table 1].

| Characteristic                              | Low Dose Aspirin<br>N=179 | No Aspirin<br>N=183 | Screen & Treat<br>N=184 |
|---------------------------------------------|---------------------------|---------------------|-------------------------|
| Age (yr)                                    | 33 (19-44)                | 34 (18-43)          | 33 (19-44)              |
| Race – No. (%)                              |                           |                     |                         |
| White                                       | 181 (97.9)                | 179 (95.7)          | 180 (97.3)              |
| Black                                       | 1 (0.5)                   | 2 (1.1)             | 0 (0)                   |
| Asian                                       | 3 (1.6)                   | 6 (3.2)             | 5 (2.7)                 |
| Other                                       | 0                         | 0 (0)               | 0 (0)                   |
| Completed secondary school – No.(%)         | 136 (73.5)                | 143 (76.4)          | 152 (82.2)              |
| BMI (kg/m <sup>2</sup> )                    | 25.2 (17.4-39.4)          | 22.9 (17.7-41.4)    | 23.8 (18.1-45.2)        |
| Gestational Age (wks)                       | 12.9 (11.1-13.9)          | 12.9 (11.1-13.9)    | 12.9 (11.3-13.9)        |
| Smoking – No. (%)                           | 17(9.2)                   | 11 (5.9)            | 7 (3.8)                 |
| Subject's mother had preeclampsia - No. (%) | 7 (3.8)                   | 10 (5.4)            | 10 (5.4)                |
| Conception – No. (%)                        |                           |                     |                         |
| IVF                                         | 5 (2.7)                   | 9 (4.8)             | 8 (4.3)                 |
| ICSI                                        | 3 (1.6)                   | 4 (2.1)             | 3 (1.6)                 |
| Ovulation induction                         | 5 (2.7)                   | 6 (3.2)             | 6 (3.2)                 |
| Spontaneous                                 | 172 (93.0)                | 168 (89.9)          | 170 (91.9)              |
| Previous miscarriage – No. (%)              | 20 (10.8)                 | 31 (16.6)           | 31 (16.8)               |

1  
2  
3 Table 1: Baseline characteristics of the study population. Where number (No.) percentage is  
4  
5 not expressed average and range are demonstrated.  
6  
7

### 8 9 **Primary outcomes**

10  
11 (i) The proportion of eligible women agreeing to participate in a trial where aspirin is  
12 prescribed routinely (feasibility); 1054 women were approached that were eligible to partake.  
13  
14 497 were subsequently not enrolled as they did not want to take aspirin n=454 or for an  
15  
16 alternative reason n=43 e.g. appointment did not suit. Hence 546/1054 (51.8%) women were  
17  
18 willing to partake in a study where they may have to take aspirin routinely.  
19  
20  
21

22  
23  
24 (ii) Compliance with study protocol, as measured by the following: (a) adherence to aspirin  
25 (acceptability), (b) attendance at study visits (acceptability), (c) satisfactory collection of all  
26  
27 endpoints and variables (feasibility), (d) specific study protocol violations (feasibility);  
28  
29  
30

31  
32  
33 (a) Of those women included in analysis that were taking aspirin (n=192), the average  
34 adherence based upon patient reported diary cards was 96.0% and based upon tablet counts  
35  
36 95.0%. Seven women were non-adherent and 19 (10.0%) poorly compliant (<80%).  
37  
38 Average adherence was 95.0% in both the test indicated aspirin group (3a) and routine aspirin  
39  
40 group (1) [Table 2]. The median first trimester pre-aspirin urine TxB2 level was 8662.2  
41  
42 pg/mg (IQR 2014.5-9931.5) and second trimester (post-aspirin) 2285.1 pg/mg (IQR 591.0-  
43  
44 2300.1). The percentage change in TxB2 was then assessed for all paired samples (n=147)  
45  
46 and found that 124/147 (84.4%) of subjects had a fall in TxB2 levels between the first and  
47  
48 second trimesters versus 23/147 (15.6%) who had an increase p<0.001. The greater the  
49  
50 reduction in urinary TxB2 pre- and post- aspirin dose the greater the degree of aspirin  
51  
52  
53  
54  
55  
56  
57  
58  
59  
60



1  
2  
3 adherence, as demonstrated in Figure 2. There was no difference between patient groups  
4 (routine aspirin and screen positive aspirin) and percentage change in urine TxB2 (p=0.61).  
5  
6

7  
8  
9 (b) Of those that underwent randomization (n=557), eleven were excluded prior to fulfillment  
10 of study participation requirements (attendance at second study visit). Of the eleven, three  
11 withdrew consent for participation as they decided that they did not wish to take aspirin  
12 following randomization.  
13  
14  
15

16  
17  
18 (c) Of all 546 subjects collection of outcome measures and variables were obtained for all  
19 apart from the questionnaire on patient acceptability, which was completed in 97.1%  
20 (530/546).  
21  
22  
23  
24  
25

26  
27  
28 d) Six protocol violations were recorded (0.01 per 100 participants) including women  
29 transferring care to another hospital (n=3), incorrect randomization of women that did not  
30 meet inclusion criteria (n=2) and a subject in the non-aspirin group commencing aspirin by  
31 their clinician (n=1).  
32  
33  
34  
35  
36

37  
38  
39 (iii) The proportion of women in whom it was possible to obtain first trimester trans-  
40 abdominal uterine artery Doppler velocimetry (feasibility); The FMF screening test was  
41 completed in 98.4% (181/184) following successful uterine artery Doppler velocimetry  
42 acquisition, of which one was obtained vaginally due to challenges with abdominal  
43 acquisition, with an overall sonographer reported ease of acquisition 3.1 (SD +/- 0.91) (score  
44 1 (easy) to 5 (unobtainable)) [Table 2].  
45  
46  
47  
48  
49  
50  
51  
52  
53  
54  
55  
56  
57  
58  
59  
60

(iv) Proportion of women with a completed screening test, issued the result within one week of the test (feasibility); The average time to obtain laboratory analyzed PAPP-A and PLGF so that a screening result could be issued was 7.6 days (0-26) with 78 (42.4%) of women waiting greater than one week and five women being beyond 16-weeks prior to result availability [Table 2].

| Adherence and feasibility parameter | Low-dose Aspirin (N=179) | No Aspirin (N=183) | Screen & Treat (N=184) |
|-------------------------------------|--------------------------|--------------------|------------------------|
| Ease of Doppler acquisition         |                          |                    |                        |
| Very easy                           |                          |                    | 8 (4%)                 |
| Easy                                |                          |                    | 53 (29%)               |
| Fair                                |                          |                    | 61 (33%)               |
| Difficult                           |                          |                    | 60 (32%)               |
| Unobtainable                        |                          |                    | 3 (2%)                 |
| Days to PLGF/PAPPA visit 1          |                          |                    | 7.6<br>[0 - 26]        |
| PLGF/PAPPA result > 16 weeks        |                          |                    | 5 (3%)                 |
| Time taken for visit 1 (mins)       | 60<br>[30 – 100]         | 60<br>[25 - 90]    | 60<br>[25 - 90]        |
| Median adherence tablet counts      | 96%                      |                    | 95% (screen positive)  |

1  
2  
3  
4  
5  
6  
7  
8  
9  
10  
11  
12  
13  
14  
15  
16  
17  
18  
19  
20  
21  
22  
23  
24  
25  
26  
27  
28  
29  
30  
31  
32  
33  
34  
35  
36  
37  
38  
39  
40  
41  
42  
43  
44  
45  
46  
47  
48  
49  
50  
51  
52  
53  
54  
55  
56  
57  
58  
59  
60

|                              |        |  |                       |
|------------------------------|--------|--|-----------------------|
| Median adherence diary cards | 94%    |  | 95% (screen positive) |
| Non-adherent                 | 7 (4%) |  | 0 (0%)                |

Table 2: Primary outcomes of feasibility and adherence

For peer review only

### Secondary outcomes

There was no difference between groups in relation to secondary outcomes [Table S1 supplementary]. For the overall cohort, there were three cases (0.37%) of early onset preeclampsia <34-weeks (0.55%), n=22 (4.03%) any preeclampsia, n=57 (10.44%) SGA infants and 15.02% (n=82) placental disease. Secondary outcomes for groups 3A (screen positive aspirin) and 3B (screen negative no aspirin) are demonstrated in Table S2 [supplementary]. Despite taking aspirin, there remained a significantly greater number with preeclampsia at <37-weeks in the screen positive versus the screen negative group, although numbers were small (n=2 (15.4%) vs. n=2 (1.2%) p=0.02). In terms of taking aspirin in a subsequent pregnancy, the questionnaire revealed that 92.3% (489/530) were willing to take aspirin in a subsequent pregnancy; 92.5% (173/187) of aspirin takers and 91.5% (314/343) of non-aspirin takers.

## Safety

There were differences between groups in relation to adverse but not serious adverse events [Tables 3 and S3 (supplementary)]. There were six perinatal deaths, all of which underwent postmortem. In the aspirin group there was one placental abruption and one case of intervillous haemorrhage. Perinatal deaths in the non-aspirin groups were due to delayed villous maturation, severe FGR, fetal thrombotic vasculopathy and neonatal septicemia. There was a difference between groups in terms of reported vaginal spotting aspirin 15.1% vs. non-aspirin 7.9% OR 2.1 (CI 1.2-3.6), which was not associated with pregnancy loss. Although, not statistically significant, there was a difference in terms of PPH >1000mls. Although rates of PPH <1000mls were greater in the aspirin-taking group, no differences were noted in terms of blood transfusion or significant hemoglobin drop to <8g/dL.

| Event                           |                                 | Aspirin<br>n=192 | Non-aspirin<br>n=354 | Odds ratio<br>(95% CI) |
|---------------------------------|---------------------------------|------------------|----------------------|------------------------|
| <b>Adverse Events</b>           |                                 |                  |                      |                        |
| Adverse Events Total No.        |                                 | 123              | 143                  | 2.6 (1.8-3.8)          |
| Vaginal spotting* No. (%)       |                                 | 29(15.1)         | 28 (7.9)             | 2.1 (1.2-3.6)          |
| Post-partum haemorrhage No. (%) |                                 |                  |                      |                        |
| >500mls*                        |                                 | 26(13.5)         | 20 (5.6)             | 2.6 (1.4-4.8)          |
| >1000mls                        |                                 | 7 (3.6)          | 5 (1.4)              | 2.8 (0.9-9.0)          |
| Blood transfusion               |                                 | 3                | 4                    | 0.5 (0.1-2.7)          |
| Hb drop <8g/dL                  |                                 | 4                | 7                    | 0.3 (0.1-1.4)          |
| <b>Serious Adverse Event</b>    |                                 |                  |                      |                        |
| NICU admission                  | Sepsis                          | 3                | 2                    |                        |
|                                 | Hypoglycaemia                   | 0                | 1                    |                        |
|                                 | Prematurity                     | 1                | 4                    |                        |
|                                 | Jaundice                        | 1                | 1                    |                        |
|                                 | Persistently low Apgar          | 1                | 3                    |                        |
|                                 | TTN                             | 1                | 3                    |                        |
|                                 | Meconium aspiration             | 1                | 0                    |                        |
|                                 | Hypoxic ischemic encephalopathy | 1                | 1                    |                        |
|                                 | Very low birthweight            | 0                | 1                    |                        |
| Total                           |                                 | 9                | 16                   | 1.04 (0.45-2.40)       |
| Perinatal Death                 |                                 | 2                | 4                    |                        |
| Total                           |                                 | 2                | 4                    | 0.92 (0.17-5.10)       |
| Maternal admission              | Preterm labor                   | 3                | 2                    |                        |
|                                 | Preeclampsia                    | 8                | 7                    |                        |
|                                 | Antepartum hemorrhage           | 3                | 7                    |                        |
|                                 | PPROM                           | 0                | 2                    |                        |
|                                 | Fetal compromise                | 1                | 2                    |                        |
|                                 | Infection                       | 2                | 5                    |                        |
|                                 | Other                           | 4                | 1                    |                        |
| Total                           |                                 | 21               | 26                   | 1.55 (0.85-2.83)       |
| Congenital anomaly              | Cardiac                         | 1                | 2                    |                        |
|                                 | Gastrointestinal                | 3                | 2                    |                        |
|                                 | Neurological                    | 0                | 1                    |                        |
|                                 | Renal                           | 0                | 1                    |                        |
| Total                           |                                 | 4                | 6                    | 1.23 (0.34-4.43)       |
| Total serious adverse events    |                                 | 36               | 52                   | 1.34 (0.84-2.14)       |

1  
2  
3  
4  
5 Table 3: Adverse and serious adverse events in aspirin and non-aspirin taking groups. There  
6  
7 may be >1 adverse event or serious adverse event per subject \* ( $p < 0.05$ ) [NICU=Neonatal  
8  
9 intensive care unit, TTN= transient tachypnea of the newborn, PPOM= preterm premature  
10  
11 rupture of membranes, Very low birthweight = <1500g].  
12  
13  
14  
15  
16  
17  
18  
19  
20  
21  
22  
23  
24  
25  
26  
27  
28  
29  
30  
31  
32  
33  
34  
35  
36  
37  
38  
39  
40  
41  
42  
43  
44  
45  
46  
47  
48  
49  
50  
51  
52  
53  
54  
55  
56  
57  
58  
59  
60

## DISCUSSION

### Main Findings

This feasibility randomised controlled trial has found that low-risk nulliparous women were open to taking aspirin in pregnancy and were adherent, with a willingness to take it again in a subsequent pregnancy. We can say this as, comparing findings to other RCTs in pregnancy, of which there are few, the uptake in this RCT was much higher as was adherence (e.g. Chiswick, *et al.* 2015; 35% enrolment and 65-67% adherence with metformin use).<sup>15</sup> This is the first trial of its kind, which has assessed the acceptability of women taking aspirin in low-risk pregnancy and the feasibility of an integrated screening test in a routine clinical setting.

### Strengths and Limitations

The strengths of this study are the multicenter RCT design with robust protocol and oversight and previously published methodology. Allocation bias was limited by use of a prospective approach and selection bias was limited by randomization. The fact that the same two sonographers and biochemists were responsible for conducting the screening test with use of quality control standards for test completion using the same equipment and technique for all subjects optimized reproducibility. There were a low number of dropouts and almost all patient outcomes were recorded. Although there is currently no validated scientific method of assessing aspirin adherence,<sup>16</sup> a laboratory assessment of change in TxB2 served as a more objective assessment, strengthening reliability. There is currently no accepted test in the literature, which can reliably determine aspirin adherence, hence three different methods were used to optimize reliability.<sup>16</sup> Study weaknesses, were primarily that PAPP-A and PLGF analysis was performed in the laboratory using validated methods with quality assurance, as opposed to the bedside point-of-care tests hence it took longer to obtain a result. In a non-research setting with a greater throughput of patients, one could anticipate a



1  
2  
3 faster turnaround time. Additionally the open-label nature of the study meant that safety  
4  
5 recording was open to reporting bias and, as is often the case with RCTs the uptake of  
6  
7 subjects demonstrated dominance for educated women. In RCTs there is always a risk of  
8  
9 introducing a Hawthorne effect, whereby subjects act differently in the confines of an RCT as  
10  
11 to how they would in a real-life setting, hence adherence rates may have been over-  
12  
13 represented.<sup>17</sup> A third trimester visit may have added strength to the study to assess  
14  
15 objectively for aspirin adherence and patient satisfaction, however as adherence prior to 16-  
16  
17 weeks was deemed the critical time point for preeclampsia prevention, follow-up at 20-22  
18  
19 weeks was selected.  
20  
21  
22  
23

### 24 **Interpretation**

25  
26 A recently published large RCT from the FMF found that, following application of FMF  
27  
28 screening and subsequent randomization of women deemed to be at risk of preterm  
29  
30 preeclampsia to aspirin 150mg versus placebo, there was a reduction in the incidence of  
31  
32 preterm preeclampsia in the aspirin arm.<sup>5</sup> Our study differs on several counts; (i) routine  
33  
34 aspirin arm – use of a third arm assessing provision of routine aspirin assessed the  
35  
36 acceptability and feasibility of this policy; (ii) aspirin dosage (150mg vs. 75mg) – in light of  
37  
38 limited evidence on dosage and effect, the safest lowest effective dose was selected. A recent  
39  
40 meta-analysis, published since completion of this study suggests that there is an aspirin dose-  
41  
42 response effect, with higher doses of aspirin commenced prior to 16-weeks gestation,  
43  
44 associated with a greater reduction in preeclampsia and fetal growth restriction compared to  
45  
46 standard lower doses.<sup>18</sup> When supported by robust safety data when using higher dosing, this  
47  
48 is something to consider in future studies and clinical practice; (iii) adverse events – rates of  
49  
50 PPH and vaginal bleeding were reported. This information would be useful from the FMF  
51  
52  
53  
54  
55  
56  
57  
58  
59  
60

1  
2  
3 study in light of the higher aspirin dosing regime and; (iv) our study was not powered to  
4 detect a difference in clinical outcome, with the primary focus feasibility and acceptability.  
5  
6  
7

8  
9 Few studies have assessed the acceptability of non-routine medications in pregnancy. In the  
10 developing world, pregnant women are willing to take calcium, oral iron and  
11 micronutrients.<sup>19-21</sup> If instructed about potential side-effects and reminded frequently  
12 women had higher levels of adherence with the greatest barrier being forgetfulness. Average  
13 medication adherence in pregnancy for chronic illness is higher than for non-routine  
14 medications at 90-95%,<sup>22</sup> hence it is promising that we have noted a rate as high as this in  
15 our own study. There was a slight discrepancy in adherence assessed via tablet counts and  
16 diary cards and that more objectively assessed via TxB2. Reasons for this may include the  
17 potential for aspirin resistance; which although not formally assessed in this study can be  
18 increased when using an enteric-coated preparation.<sup>23</sup>  
19  
20  
21  
22  
23  
24  
25  
26  
27  
28  
29  
30  
31  
32

33 The FMF screening test was feasible in terms of acquiring first trimester uterine artery  
34 Doppler velocimetry measurements, though delays were encountered in obtaining laboratory  
35 analyzed PAPP-A and PLGF. This is relevant as it reflects the practical aspects of such a  
36 screening test in a clinical real life setting. Improved protocols between the clinical and  
37 laboratory staff would be required to allow patients receive results within a reasonable  
38 timeline.  
39  
40  
41  
42  
43  
44  
45  
46  
47

48 In terms of vaginal spotting and clinically significant PPH with aspirin use, the findings of  
49 this study are comparable with previous studies although evidence of increased antenatal and  
50 postnatal bleeding, requires further investigation, most notably with use of aspirin at doses  
51 greater than 75mg.<sup>24-25</sup> Due to the open-label nature of this study as opposed to placebo  
52  
53  
54  
55  
56  
57  
58  
59  
60

1  
2  
3 control, there is always a potential of reporting bias of bleeding in the aspirin arms. Although  
4 generally safe in pregnancy, it may be worthwhile considering cessation of aspirin at 32-34  
5 weeks gestation with the aim of reducing the risk of PPH, as opposed to 36-weeks and of  
6 informing women of the unwanted side-effect of increased vaginal spotting.  
7  
8  
9  
10

## 11 12 13 **Conclusion**

14  
15  
16 It has been proposed that the most cost-effective approach to reducing preeclampsia is the  
17 provision of an effective, affordable and safe intervention applied to all mothers without prior  
18 testing to assess levels of risk.<sup>7</sup> A algorithm-based screen-and-treat approach, as proposed by  
19 the FMF has can reduce rates of pre-term preeclampsia when doses of 150mg of aspirin are  
20 used. This study was not powered to nor did it detect a difference in rates of preeclampsia  
21 between groups, yet has taken the first step to address if low-risk nulliparous women are open  
22 to taking aspirin in the first instance and if a screening algorithm is feasible. Moving  
23 forward, an RCT is required to address the efficacy of universal low dose aspirin in low-risk  
24 pregnancy compared to a screening approach. This will require significant numbers due to  
25 the low incidence of early-onset preeclampsia. Although women were open to taking aspirin  
26 in pregnancy compared to other RCTs involving medication, almost twice the number  
27 enrolled had to be approached to obtain adequate study participants. This must be considered  
28 when planning a future trial.  
29  
30  
31  
32  
33  
34  
35  
36  
37  
38  
39  
40  
41  
42  
43  
44  
45  
46  
47  
48  
49  
50  
51  
52  
53  
54  
55  
56  
57  
58  
59  
60

1  
2  
3 **COMPETING INTERESTS STATEMENT:** Authors report no conflict of interest  
4  
5

6  
7 **FUNDING STATEMENT:** This work was supported by Perinatal Ireland, HRB and HRB  
8  
9 Mother and Baby Clinical Trials Network.  
10

11  
12  
13 **CONTRIBUTION OF AUTHORSHIP:** (i) Conceived and designed the experiments: FM,  
14  
15 CM, PMcP, FB, PD, DM, MC, AS, FC, JM, SD, JH, AC, ET, PD, ZA, FDM, FMcA; (ii)  
16  
17 Performed the experiments: FM, CM, FC ; (iii) Analyzed the data: FM, PD, ZA, FMcA; (iv)  
18  
19 Contributed reagents/materials/analysis/tools: PMcP, FB, PD, DM, MC, AS, JM, SD, JH,  
20  
21 AC, AH, ET, PD, ZA, FDM, FMcA; (v) Wrote the paper: FM, CM, PMcP, FB, PD, DM,  
22  
23 MC, AS, FC, JM, SD, JH, AC, AH, ET, PD, ZA, FDM, FMcA  
24  
25  
26  
27

28  
29 **ACKNOWLEDGEMENTS:** The women that took part in the study  
30  
31

32  
33 **DATA SHARING STATEMENT:** Dataset available from corresponding author on request  
34  
35  
36  
37  
38  
39  
40  
41  
42  
43  
44  
45  
46  
47  
48  
49  
50  
51  
52  
53  
54  
55  
56  
57  
58  
59  
60

**REFERENCES**

1. Henderson JT, Whitlock EP, O'Connor E, Senger CA, Thompson GH, Rowland MG. Low-dose aspirin for prevention of morbidity and mortality from preeclampsia: A systematic evidence review from the U.S. Preventative Services Task Force. *Ann Intern Med.* 2014; 160: 695-703
2. Sibai BM, Caritis SN, Thom E, Klebanoff M, McNellis D, Rocco L, *et al.* Prevention of preeclampsia with low-dose aspirin in healthy, nulliparous pregnant women. The National Institute of Child Health and Human Development Network of Maternal-Fetal Medicine Units. *N Eng J Med* 1993; 329(17): 1213-8
3. Akolekar R, Syngelaki A, Poon L, Wright D, Nicolaides KH. Competing risks model in early screening for preeclampsia by biophysical and biochemical markers. *Fetal Diagn Ther.* 2013;33(1): 8-15
4. Mone F, Mulcahy C, McParland, McAuliffe FM. Should we recommend universal aspirin for all pregnant women? *Am J Obstet Gynecol.* 2017; 216(2): 141.e1-141.e5
5. Rolnik DL, Wright D, Poon LC, O'Gorman N, Syngelaki A, de Paco Matallaa C, *et al.* Aspirin versus placebo in pregnancies at high risk for preterm preeclampsia. *N Eng J Med* 2017; 377: 613-22
6. O'Gorman N, Wright D, Poon LC, Rolnik DL, Syngelaki A, de Alvarado M, *et al.* Multicenter screening for preeclampsia by maternal factors and biomarkers at 11-13 weeks' gestation: comparison to NICE guidelines and ACOG recommendations. *Ultrasound Obstet Gynecol* 2017; 49(6):756-760

- 1  
2  
3 7. Meads CA, Cnossen JS, Meher S, Juarez-Garcia A, ter Riet G, Duley L, *et al.*  
4  
5 Methods of prediction and prevention of pre-eclampsia: systematic reviews of  
6  
7 accuracy and effectiveness literature with economic modelling. *Health Technol*  
8  
9 *Assess.* 2008;12(6).
- 10  
11  
12 8. Mone F, Mulcahy C, McParland P, *et al.* An open-labeled controlled trial of low dose  
13  
14 aspirin with an early screening test for pre-eclampsia and growth restriction (TEST):  
15  
16 Trial Protocol. *Contemp Clin Trials* 2016; 49: 143-8
- 17  
18  
19 9. NICE. Guideline CG107 : Hypertension in Pregnancy : The management of  
20  
21 hypertensive disorders during pregnancy. National Institute for Health and Clinical  
22  
23 Excellence 2010. (Accessed Sept 5, 2016, at  
24  
25 <https://www.nice.org.uk/guidance/cg107>)  
26
- 27  
28 10. Perneby C, Vahter M, Akesson A, Bremme K, Hjemdahl P. Thromboxane metabolite  
29  
30 excretion during pregnancy – influence of preeclampsia and aspirin treatment.  
31  
32 *Thromb Res* 2011;127(6):605-6
- 33  
34 11. Poon LCY, Zymery NA, Zamprakou A, Syngelaki A, Nicolaides KH. Protocol for  
35  
36 measurement of mean arterial pressure at 11-13 weeks' gestation. *Fetal Diagn Ther.*  
37  
38 2012;31(1):42-48
- 39  
40 12. Bhide A, Acharya G, Bilardo CM, Brezinka C, Cafici D, Hernandez-Andrade E, *et al.*  
41  
42 ISUOG Practice guidelines: use of Doppler ultrasonography in obstetrics. *Ultrasound*  
43  
44 *Obstet Gynecol.* 2013; 41(2), 233-239
- 45  
46  
47 13. International society for the study of hypertension in pregnancy. The classification,  
48  
49 diagnosis and management of the hypertensive disorders of pregnancy: A revised  
50  
51 statement from the ISSHP. *Pregnancy Hypertension: An International Journal of*  
52  
53 *Women's Cardiovascular Health* 2014;4:97-104  
54  
55  
56  
57  
58  
59

- 1  
2  
3 14. Billingham SAM, Whitehead AL, Julious SA. An audit of sample sizes for pilot and  
4  
5 feasibility trials being undertaken in the United Kingdom registered in the United  
6  
7 Kingdom Clinical Research Network database. *BMC Med Res Methodol* 2013;13:104  
8
- 9  
10 15. Chiswick C, Reynolds RM, Denison F, Drake AJ, Forbes S, Newby DE, *et al.* Effect  
11  
12 of metformin on maternal and fetal outcomes in obese pregnant women  
13  
14 (EMPOWaR): a randomised, double-blind, placebo-controlled trial. *Lancet Diabetes*  
15  
16 *Endocrinol* 2015;3(10):778-786
- 17  
18 16. Navaratnam K, Alfirevic A, Alfirevic Z. Low dose aspirin and pregnancy: how  
19  
20 important is aspirin resistance? *BJOG* 2016;123(9):1481-7
- 21  
22 17. McCambridge J, Witton J, Elbourne DR. Systematic review of the Hawthorne effect:  
23  
24 New concepts are needed to study research participation effects. *J Clin Epidemiol*  
25  
26 2014; 67(3): 267-77
- 27  
28 18. Roberge S, Nicolaides K, Demers S, Hyett J, Chaillet N, Bujold E. The role of  
29  
30 aspirin dose on the prevention of preeclampsia and fetal growth restriction: systematic  
31  
32 review and meta-analysis. *Am J Obstet Gynecol* 2017;216(2):110-20
- 33  
34 19. Thapa K, Sanghvi H, Rawlins B, Karki YB, Regmi K, Arval S, *et al.* Coverage,  
35  
36 compliance, acceptability and feasibility of a program to prevent pre-eclampsia and  
37  
38 eclampsia through calcium supplementation for pregnant women: an operations  
39  
40 research study in one district of Nepal. *BMC Pregnancy Childbirth.* 2015; 16: 241  
41  
42  
43
- 44 20. Kulkarni B, Christian P, LeClerq SC, Khattri SK. Determinants of compliance to  
45  
46 antenatal micronutrient supplementation and women's perceptions of supplement use  
47  
48 in rural Nepal. *Public Health Nutr.* 2010; 13(1): 82-90  
49
- 50 21. Seck BC and Jackson RT. Determinants of compliance with iron supplementation  
51  
52 among pregnant women in Sengal. *Public Health Nutr.* 2008; 11(6): 596-605  
53  
54
- 55 22. De Jonge L, de Walle HEK, de Jong-van den Berg LTW, van Langen IM, Bakker  
56  
57  
58  
59  
60

- 1  
2  
3 MK. Actual Use of Medications Prescribed During Pregnancy: A Cross-Sectional  
4 Study Using Data from a Population-Based Congenital Anomaly Registry. *Drug Saf.*  
5 2015; 38: 737-47  
6  
7  
8  
9 23. Caron N, Rivard GE, Michon N, Morin F, Pilon D, Moutquin JM, Rey E. Low dose  
10 ASA response using the PFA-100 in women with high risk pregnancy. *J Obstet*  
11 *Gynaecol Can.* 2009; 31: 1022-7  
12  
13  
14  
15 24. Schisterman EF, Silver RM, Leshner LL, Faraggi D, Wactawski-Wende J, Townsend  
16 JM, *et al.* Preconception low-dose aspirin and pregnancy outcomes: results from the  
17 EAGeR randomised trial. *Lancet.* 2014; 384: 29-36  
18  
19  
20  
21  
22 25. Golding J. A randomised trial of low dose aspirin for primiparae in pregnancy: The  
23 Jamaica Low Dose Aspirin Study Group. *BJOG.* 1998; 105(3): 293-9  
24  
25  
26  
27  
28  
29  
30

### 31 **FIGURE LEGENDS**

32  
33 Figure 1 - Consort diagram

34  
35 Figure 2 - Histogram demonstrating percentage change in urinary thromboxane-B2 levels  
36 pre- and post - aspirin administration (n=147) [TxB2 = urinary-thromboxane level]  
37  
38  
39  
40  
41  
42  
43  
44  
45  
46  
47  
48  
49  
50  
51  
52  
53  
54  
55  
56  
57  
58  
59  
60



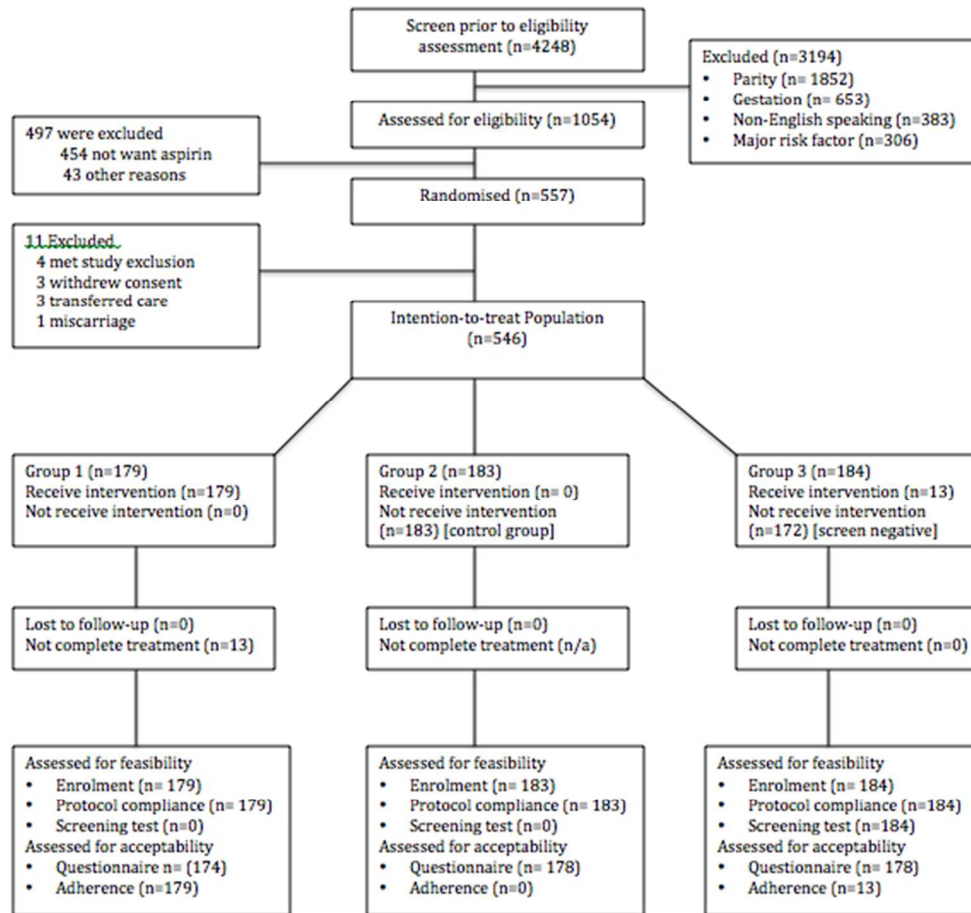

Figure 1 – Consort diagram

Figure 1 - consort diagram

206x206mm (72 x 72 DPI)

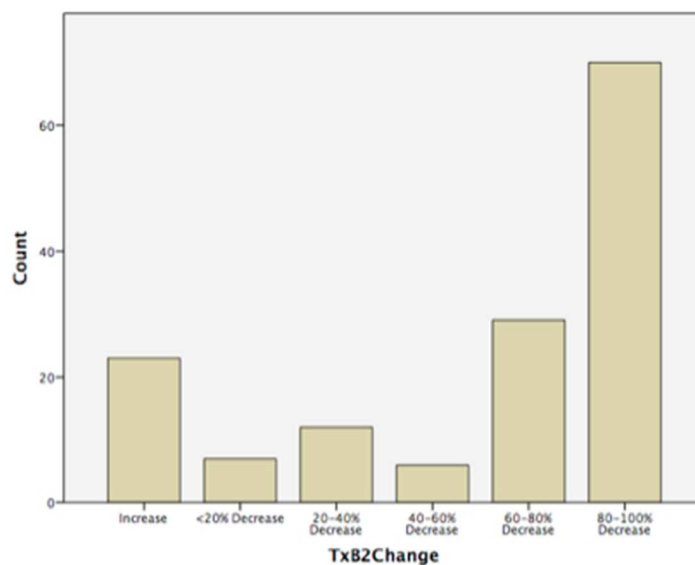

[Figure 2 - Histogram demonstrating percentage change in urinary thromboxane-B2 levels pre- and post aspirin administration (n=147) [TxB2 = urinary B2-thromboxane level]

Figure 2 - Histogram demonstrating percentage change in urinary thromboxane-B2 levels pre- and post aspirin administration (n=147) [TxB2 = urinary B2-thromboxane level]

204x180mm (72 x 72 DPI)

| Outcome                                       | Low Dose Aspirin (Group 1)<br>N=179 | No Aspirin (Group 2)<br>N=183 | Screen and Treat (Group 3)<br>N=184 | p-value |
|-----------------------------------------------|-------------------------------------|-------------------------------|-------------------------------------|---------|
| Gestation at delivery (wks)                   | 40.2 (1.4)                          | 39.9 (1.9)                    | 40.2 (1.5)                          | 0.13    |
| Birthweight (g)                               | 3529 (469)                          | 3478 (493)                    | 3488 (502)                          | 0.58    |
| Birthweight <10 <sup>th</sup> centile No. (%) | 14 (8%)                             | 18(10%)                       | 25 (14%)                            | 0.19    |
| Mode of delivery No. (%)                      |                                     |                               |                                     |         |
| Spontaneous                                   | 85 (47.5)                           | 95 (52.0)                     | 88 (47.8)                           | 0.64    |
| Instrumental                                  | 56 (31.3)                           | 47 (25.7)                     | 51 (27.7)                           | 0.09    |
| Caesarean                                     | 38 (21.2)                           | 41 (22.3)                     | 45 (24.5)                           | 0.68    |
| Pre-term delivery <34 weeks No. (%)           | 1 (0.6)                             | 3 (1.6)                       | 2 (1.1)                             | 0.62    |
| Spontaneous Labor No. (%)                     | 96 (53.7)                           | 103 (56.3)                    | 101 (54.9)                          | 0.88    |
| Preeclampsia No. (%)                          | 8 (4.5)                             | 7 (3.8)                       | 7 (3.8)                             | 0.95    |
| Preeclampsia <34-weeks                        | 0 (0)                               | 2 (1.1)                       | 1 (0.5)                             | 0.56    |
| Preeclampsia <37-weeks                        | 2 (1.1)                             | 2 (1.1)                       | 2 (1.1)                             | 0.99    |
| Abruption No. (%)                             | 1 (0.5)                             | 0 (0)                         | 0 (0)                               | 0.71    |
| NICU admission No. (%)                        | 9 (5.0)                             | 7 (3.8)                       | 9 (4.9)                             | 0.83    |
| Apgar < 7 No. (%)                             | 5 (2.8)                             | 2 (1.6)                       | 3 (1.6)                             | 0.46    |
| Cord pH (arterial)                            | 7.3 (0.1)                           | 7.3 (0.1)                     | 7.3 (0.1)                           | 0.55    |
| Outcome No. (%)                               |                                     |                               |                                     |         |
| Alive at 6-weeks                              | 177 (98.9)                          | 181 (99.0)                    | 182 (98.9)                          | 0.99    |
| Stillbirth                                    | 2 (1.1)                             | 1 (0.5)                       | 0 (0)                               | 0.81    |
| Neonatal death                                | 0 (0)                               | 1 (0.5)                       | 2 (1.1)                             | 0.37    |

Table S1: Secondary outcome measures

(Expressed as average and standard deviation unless otherwise stated)

| Outcome                                       | Screen positive;<br>Aspirin<br>Group 3A<br><br>N=13 | Screen negative;<br>No Aspirin<br>Group 3B<br><br>N=171 | p-value |
|-----------------------------------------------|-----------------------------------------------------|---------------------------------------------------------|---------|
| Preeclampsia No. (%)                          | 2 (15.4)                                            | 5 (2.9)                                                 | 0.13    |
| Pre-eclampsia <34-weeks                       | 0 (0)                                               | 2 (1.2)                                                 | 0.70    |
| Pre-eclampsia <37-weeks                       | 2 (15.4)                                            | 2 (1.2)                                                 | 0.02    |
| Birthweight <10 <sup>th</sup> centile No. (%) | 4 (30.7)                                            | 21 (12.3)                                               | 0.15    |
| Pre-term delivery <34 weeks No. (%)           | 1 (7.7)                                             | 1 (0.6)                                                 | 0.32    |
| NICU admission No. (%)                        | 0 (0)                                               | 9 (5.3)                                                 | 0.86    |
| Outcome No. (%)                               |                                                     |                                                         |         |
| Alive at 6-weeks                              | 13 (100)                                            | 169 (98.8)                                              | 0.70    |
| Stillbirth                                    | 0 (0)                                               | 2 (1.2)                                                 | 0.70    |
| Neonatal death                                | 0 (0)                                               | 0 (0)                                                   | --      |

Table S2 - Secondary outcome measures in Group 3 (screen and treat)

(Expressed as average and standard deviation unless otherwise stated)

| Adverse/Serious Adverse Event            | Low dose Aspirin<br>Group 1<br>N=179 | No-aspirin<br>Group 2<br>N=183 | Screen and treat<br>Group 3<br>N=184 | p-value |
|------------------------------------------|--------------------------------------|--------------------------------|--------------------------------------|---------|
| Adverse events                           |                                      |                                |                                      |         |
| Vaginal spotting<br>No. (%) <sup>*</sup> | 27 (15.1)                            | 18 (9.8)                       | 12 (6.5)                             | 0.03    |
| Post-partum haemorrhage No. (%)          |                                      |                                |                                      |         |
| >500mls <sup>*</sup>                     | 25 (13.0)                            | 9 (4.9)                        | 12 (6.5)                             | 0.004   |
| >1000mls                                 | 7 (3.6%)                             | 1 (0.5)                        | 4 (2.2)                              | 0.073   |
| Serious Adverse Events                   |                                      |                                |                                      |         |
| NICU admission                           | 9 (5.0)                              | 7 (3.8)                        | 9 (4.9)                              | 0.83    |
| Perinatal Death                          | 2 (1.1)                              | 2 (1.1)                        | 2 (1.1)                              | 0.99    |
| Maternal admission                       | 18 (10.1)                            | 15 (8.2)                       | 14 (7.6)                             | 0.69    |
| Congenital anomaly                       | 3 (1.7)                              | 4 (2.2)                        | 3 (1.6)                              | 0.91    |
| Total serious adverse events             | 32 (17.8)                            | 28 (15.3)                      | 28 (15.2)                            | 0.74    |

Table S3 – Adverse and serious adverse events in all three groups. There may be >1 adverse event or serious adverse event per subject \* (p<0.05)

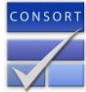

## CONSORT 2010 checklist of information to include when reporting a pilot or feasibility trial\*

| Section/Topic                    | Item No | Checklist item                                                                                                                                                                              | Reported on page No |
|----------------------------------|---------|---------------------------------------------------------------------------------------------------------------------------------------------------------------------------------------------|---------------------|
| <b>Title and abstract</b>        |         |                                                                                                                                                                                             |                     |
|                                  | 1a      | Identification as a pilot or feasibility randomised trial in the title                                                                                                                      | 1-3                 |
|                                  | 1b      | Structured summary of pilot trial design, methods, results, and conclusions (for specific guidance see CONSORT abstract extension for pilot trials)                                         | 45-72               |
| <b>Introduction</b>              |         |                                                                                                                                                                                             |                     |
| Background and objectives        | 2a      | Scientific background and explanation of rationale for future definitive trial, and reasons for randomised pilot trial                                                                      | 83-98               |
|                                  | 2b      | Specific objectives or research questions for pilot trial                                                                                                                                   | 98-104              |
| <b>Methods</b>                   |         |                                                                                                                                                                                             |                     |
| Trial design                     | 3a      | Description of pilot trial design (such as parallel, factorial) including allocation ratio                                                                                                  | 110, 137-139        |
|                                  | 3b      | Important changes to methods after pilot trial commencement (such as eligibility criteria), with reasons                                                                                    | N/A                 |
| Participants                     | 4a      | Eligibility criteria for participants                                                                                                                                                       | 123-133             |
|                                  | 4b      | Settings and locations where the data were collected                                                                                                                                        | 110-111             |
|                                  | 4c      | How participants were identified and consented                                                                                                                                              | 132-133             |
| Interventions                    | 5       | The interventions for each group with sufficient details to allow replication, including how and when they were actually administered                                                       | 146-188             |
| Outcomes                         | 6a      | Completely defined prespecified assessments or measurements to address each pilot trial objective specified in 2b, including how and when they were assessed                                | 190-223             |
|                                  | 6b      | Any changes to pilot trial assessments or measurements after the pilot trial commenced, with reasons                                                                                        | n/a                 |
|                                  | 6c      | If applicable, prespecified criteria used to judge whether, or how, to proceed with future definitive trial                                                                                 | 94-98               |
| Sample size                      | 7a      | Rationale for numbers in the pilot trial                                                                                                                                                    | 230-236             |
|                                  | 7b      | When applicable, explanation of any interim analyses and stopping guidelines                                                                                                                | n/a                 |
| Randomisation:                   |         |                                                                                                                                                                                             |                     |
| Sequence generation              | 8a      | Method used to generate the random allocation sequence                                                                                                                                      | 137-138             |
|                                  | 8b      | Type of randomisation(s); details of any restriction (such as blocking and block size)                                                                                                      | 138                 |
| Allocation concealment mechanism | 9       | Mechanism used to implement the random allocation sequence (such as sequentially numbered containers), describing any steps taken to conceal the sequence until interventions were assigned | 141-144             |

|                                                      |     |                                                                                                                                                                                       |                    |
|------------------------------------------------------|-----|---------------------------------------------------------------------------------------------------------------------------------------------------------------------------------------|--------------------|
| Implementation                                       | 10  | Who generated the random allocation sequence, who enrolled participants, and who assigned participants to interventions                                                               | 137-138, 141-142   |
| Blinding                                             | 11a | If done, who was blinded after assignment to interventions (for example, participants, care providers, those assessing outcomes) and how                                              | n/a                |
|                                                      | 11b | If relevant, description of the similarity of interventions                                                                                                                           | 138-141            |
| Statistical methods                                  | 12  | Methods used to address each pilot trial objective whether qualitative or quantitative                                                                                                | 236-242            |
| <b>Results</b>                                       |     |                                                                                                                                                                                       |                    |
| Participant flow (a diagram is strongly recommended) | 13a | For each group, the numbers of participants who were approached and/or assessed for eligibility, randomly assigned, received intended treatment, and were assessed for each objective | Figure 1           |
|                                                      | 13b | For each group, losses and exclusions after randomisation, together with reasons                                                                                                      | Figure 1           |
| Recruitment                                          | 14a | Dates defining the periods of recruitment and follow-up                                                                                                                               | 253-255            |
|                                                      | 14b | Why the pilot trial ended or was stopped                                                                                                                                              | 253-255            |
| Baseline data                                        | 15  | A table showing baseline demographic and clinical characteristics for each group                                                                                                      | 262-265            |
| Numbers analysed                                     | 16  | For each objective, number of participants (denominator) included in each analysis. If relevant, these numbers should be by randomised group                                          | Figure 1           |
| Outcomes and estimation                              | 17  | For each objective, results including expressions of uncertainty (such as 95% confidence interval) for any estimates. If relevant, these results should be by randomised group        | 334-365 + Table S2 |
| Ancillary analyses                                   | 18  | Results of any other analyses performed that could be used to inform the future definitive trial                                                                                      | Table S2           |
| Harms                                                | 19  | All important harms or unintended effects in each group (for specific guidance see CONSORT for harms)                                                                                 | 346-363            |
|                                                      | 19a | If relevant, other important unintended consequences                                                                                                                                  | 346-363            |
| <b>Discussion</b>                                    |     |                                                                                                                                                                                       |                    |
| Limitations                                          | 20  | Pilot trial limitations, addressing sources of potential bias and remaining uncertainty about feasibility                                                                             | 376-399            |
| Generalisability                                     | 21  | Generalisability (applicability) of pilot trial methods and findings to future definitive trial and other studies                                                                     |                    |
| Interpretation                                       | 22  | Interpretation consistent with pilot trial objectives and findings, balancing potential benefits and harms, and considering other relevant evidence                                   | 401-443            |
|                                                      | 22a | Implications for progression from pilot to future definitive trial, including any proposed amendments                                                                                 | 454-459            |
| <b>Other information</b>                             |     |                                                                                                                                                                                       | 401-443            |
| Registration                                         | 23  | Registration number for pilot trial and name of trial registry                                                                                                                        | 116-117            |
| Protocol                                             | 24  | Where the pilot trial protocol can be accessed, if available                                                                                                                          | Supplementary file |
| Funding                                              | 25  | Sources of funding and other support (such as supply of drugs), role of funders                                                                                                       | 116-120            |
|                                                      | 26  | Ethical approval or approval by research review committee, confirmed with reference number                                                                                            | 115-116            |

1 Citation: Eldridge SM, Chan CL, Campbell MJ, Bond CM, Hopewell S, Thabane L, et al. CONSORT 2010 statement: extension to randomised pilot and feasibility trials. BMJ. 2016;355.  
2  
3 \*We strongly recommend reading this statement in conjunction with the CONSORT 2010, extension to randomised pilot and feasibility trials, Explanation and Elaboration for important  
4 clarifications on all the items. If relevant, we also recommend reading CONSORT extensions for cluster randomised trials, non-inferiority and equivalence trials, non-pharmacological  
5 treatments, herbal interventions, and pragmatic trials. Additional extensions are forthcoming: for those and for up to date references relevant to this checklist, see [www.consort-statement.org](http://www.consort-statement.org).  
6  
7  
8  
9  
10  
11  
12  
13  
14  
15  
16  
17  
18  
19  
20  
21  
22  
23  
24  
25  
26  
27  
28  
29  
30  
31  
32  
33  
34  
35  
36  
37  
38  
39  
40  
41  
42

For peer review only



# BMJ Open

## Trial of feasibility and acceptability of routine low dose aspirin versus Early Screening Test indicated aspirin for preeclampsia prevention [TEST Study] – A multicenter randomised controlled trial

|                                 |                                                                                                                                                                                                                                                                                                                                                                                                                                                                                                                                                                                                                                                                                                                                                                                                                                                                                                                                                                                                                                                                                                                                                                                                                                                                                                                                                                                                                                                                                                                                                                                                                                                                                   |
|---------------------------------|-----------------------------------------------------------------------------------------------------------------------------------------------------------------------------------------------------------------------------------------------------------------------------------------------------------------------------------------------------------------------------------------------------------------------------------------------------------------------------------------------------------------------------------------------------------------------------------------------------------------------------------------------------------------------------------------------------------------------------------------------------------------------------------------------------------------------------------------------------------------------------------------------------------------------------------------------------------------------------------------------------------------------------------------------------------------------------------------------------------------------------------------------------------------------------------------------------------------------------------------------------------------------------------------------------------------------------------------------------------------------------------------------------------------------------------------------------------------------------------------------------------------------------------------------------------------------------------------------------------------------------------------------------------------------------------|
| Journal:                        | <i>BMJ Open</i>                                                                                                                                                                                                                                                                                                                                                                                                                                                                                                                                                                                                                                                                                                                                                                                                                                                                                                                                                                                                                                                                                                                                                                                                                                                                                                                                                                                                                                                                                                                                                                                                                                                                   |
| Manuscript ID                   | bmjopen-2018-022056.R2                                                                                                                                                                                                                                                                                                                                                                                                                                                                                                                                                                                                                                                                                                                                                                                                                                                                                                                                                                                                                                                                                                                                                                                                                                                                                                                                                                                                                                                                                                                                                                                                                                                            |
| Article Type:                   | Research                                                                                                                                                                                                                                                                                                                                                                                                                                                                                                                                                                                                                                                                                                                                                                                                                                                                                                                                                                                                                                                                                                                                                                                                                                                                                                                                                                                                                                                                                                                                                                                                                                                                          |
| Date Submitted by the Author:   | 24-May-2018                                                                                                                                                                                                                                                                                                                                                                                                                                                                                                                                                                                                                                                                                                                                                                                                                                                                                                                                                                                                                                                                                                                                                                                                                                                                                                                                                                                                                                                                                                                                                                                                                                                                       |
| Complete List of Authors:       | Mone, Fionnuala; UCD Perinatal Research Centre, Obstetrics and Gynaecology, School of Medicine, University College Dublin, Mulcahy, Cecilia; UCD Perinatal Research Centre, Obstetrics and Gynaecology, School of Medicine, University College Dublin McParland, Peter; UCD Perinatal Research Centre, Obstetrics and Gynaecology, School of Medicine, University College Dublin Brethnach, FIONNUALA; Royal College of Surgeons in Ireland Downey, Paul; Department of Pathology and Laboratory Medicine, National Maternity Hospital McCormack, Dorothy; Department of Pharmacy, National Maternity Hospital Culliton, Marie; Department of Pathology and Laboratory Medicine, National Maternity Hospital Staunton, Alice; Royal College of Surgeons in Ireland Cody, Fiona; Royal College of Surgeons in Ireland Morrison, John; National University of Ireland Galway, Obstetrics and Gynaecology Daly, Sean; Coombe Women and Infants University Hospital, Obstetrics and Gynaecology Higgins, John; Department of Obstetrics and Gynaecology, University College Cork Cotter, Amanda; Department of Obstetrics and Gynaecology, Graduate Entry Medical School, University of Limerick Hunter, Alyson; Royal Maternity Hospital, Grosvenor Road, BT12 6BB Tully, Elizabeth; Royal College of Surgeons in Ireland, Perinatal Ireland Dicker, Patrick; Perinatal Ireland Alfirevic, Zarko; University of Liverpool, Department of Women's and Children's Health Malone, Fergal; Royal College of Surgeons in Ireland, Obstetrics and Gynaecology McAuliffe, Fionnuala; University College Dublin, School of Medicine; National Maternity Hospital, Obstetrics and Gynaecology |
| <b>Primary Subject Heading</b>: | Obstetrics and gynaecology                                                                                                                                                                                                                                                                                                                                                                                                                                                                                                                                                                                                                                                                                                                                                                                                                                                                                                                                                                                                                                                                                                                                                                                                                                                                                                                                                                                                                                                                                                                                                                                                                                                        |
| Secondary Subject Heading:      | Health policy, Public health                                                                                                                                                                                                                                                                                                                                                                                                                                                                                                                                                                                                                                                                                                                                                                                                                                                                                                                                                                                                                                                                                                                                                                                                                                                                                                                                                                                                                                                                                                                                                                                                                                                      |
| Keywords:                       | preeclampsia, screening, aspirin, feasibility, low risk                                                                                                                                                                                                                                                                                                                                                                                                                                                                                                                                                                                                                                                                                                                                                                                                                                                                                                                                                                                                                                                                                                                                                                                                                                                                                                                                                                                                                                                                                                                                                                                                                           |

1  
2  
3  
4  
5  
6  
7  
8  
9  
10  
11  
12  
13  
14  
15  
16  
17  
18  
19  
20  
21  
22  
23  
24  
25  
26  
27  
28  
29  
30  
31  
32  
33  
34  
35  
36  
37  
38  
39  
40  
41  
42  
43  
44  
45  
46  
47  
48  
49  
50  
51  
52  
53  
54  
55  
56  
57  
58  
59  
60



SCHOLARONE™  
Manuscripts

For peer review only

1  
2  
3 1 **TITLE:** Trial of feasibility and acceptability of routine low dose aspirin versus Early  
4 2 Screening Test indicated aspirin for preeclampsia prevention [**TEST** Study] – A multicenter  
5 3 randomised controlled trial  
6 4

7 5 **AUTHORS:** Fionnuala MONE<sup>1</sup>, Ms. Cecilia MULCAHY<sup>1</sup>, Peter McPARLAND<sup>1</sup>,  
8 6 Fionnuala BREATHNACH<sup>2</sup>, Paul DOWNEY<sup>3</sup>, Ms. Dorothy MCCORMACK<sup>4</sup>, Ms. Marie  
9 7 CULLITON<sup>3</sup>, Alice STANTON<sup>5</sup>, Ms. Fiona CODY<sup>2</sup>, John MORRISON<sup>6</sup>, Sean DALY<sup>7</sup>, John  
10 8 HIGGINS<sup>8</sup>, Amanda COTTER<sup>9</sup>, Alyson HUNTER<sup>10</sup>, Elizabeth TULLY<sup>2</sup>, Patrick DICKER<sup>2</sup>,  
11 9 Zarko ALFIREVIC<sup>11</sup>, Fergal D MALONE<sup>2</sup>, Fionnuala M McAULIFFE<sup>1\*</sup>  
12  
13

14 11 **AFFILIATIONS:**

15 12 1.UCD Perinatal Research Centre, School of Medicine, University College Dublin, National  
16 13 Maternity Hospital, Dublin, Ireland. 2. Department of Obstetrics and Gynaecology, Royal  
17 14 College of Surgeons in Ireland, Rotunda Hospital, Parnell Square, Dublin 1, Ireland. 3.  
18 15 Department of Pathology and Laboratory Medicine, National Maternity Hospital, Holles St,  
19 16 Dublin 2, Ireland. 4. Department of Pharmacy, National Maternity Hospital, Holles St,  
20 17 Dublin 2, Ireland. 5. Molecular and Cellular Therapeutics, Royal College of Surgeons in  
21 18 Ireland, Dublin 2, Ireland. 6. Department of Obstetrics and Gynaecology, National  
22 19 University of Ireland, Galway, Ireland. 7. Department of Obstetrics and Gynaecology,  
23 20 Coombe Women's and Infant's University Hospital, Dublin 8, Ireland. 8. Department of  
24 21 Obstetrics and Gynaecology, University College Cork, Cork, Ireland. 9. Department of  
25 22 Obstetrics and Gynaecology, Graduate Entry Medical School, University of Limerick,  
26 23 Limerick, Ireland. 10. Royal Jubilee Maternity Hospital, Belfast, UK. 11. Department of  
27 24 women's and Children's Health, Institute of Translational Medicine, University of Liverpool,  
28 25 Liverpool, UK  
29  
30

31 27 \*Corresponding author: Prof FM McAuliffe. UCD Perinatal Research Centre, School of  
32 28 Medicine, University College Dublin, National Maternity Hospital, Dublin, Ireland. T:+353 1  
33 29 6373216 E: [Fionnuala.mcauliffe@ucd.ie](mailto:Fionnuala.mcauliffe@ucd.ie)  
34 30

35  
36  
37 31 **WORD Count:** 3, 927 words  
38 32  
39  
40 33  
41  
42 34  
43  
44 35  
45  
46 36  
47  
48 37  
49  
50 38  
51  
52 39  
53  
54 40  
55  
56  
57  
58  
59  
60

1  
2  
3 41  
4  
5 42  
6  
7 43  
8  
9 44  
10

11 45 **ABSTRACT**

12  
13 46 **Objective:** Evaluate feasibility and acceptability of routine aspirin in low-risk women,  
14  
15 compared to screening-test indicated aspirin for prevention of preeclampsia and fetal growth  
16  
17 restriction (FGR) prevention.  
18

19  
20 49 **Design:** Multicentre open-label feasibility randomised controlled trial.

21  
22 50 **Setting:** Two tertiary maternity hospitals in Dublin, Ireland.

23  
24 51 **Participants:** 546 low-risk nulliparous women completed the study

25  
26 52 **Interventions:** Women underwent computerised randomisation to; Group 1- routine aspirin  
27  
28 75mg from 11 until 36 weeks; Group 2 - no aspirin; and Group 3 - aspirin based on the Fetal  
29  
30 Medicine Foundation screening test.  
31

32  
33 55 **Primary and secondary outcome measures:** (a) proportion agreeing to participate; (b)  
34  
35 compliance with protocol; (c) proportion where first trimester uterine artery Doppler was  
36  
37 obtainable and; (iv) time taken to issue screening result. Secondary outcomes included rates  
38  
39 of preeclampsia and small-for-gestational age fetuses.  
40

41  
42 59 **Results:** 546 were included in the routine aspirin (n=179), no aspirin (n=183) and screen and  
43  
44 treat (n=184) groups. 546 of 1054 approached (51.8%), enrolled. Average aspirin  
45  
46 adherence was 90%. Uterine artery Doppler was obtained in 98.4% (181/184) and average  
47  
48 time to obtain a screening result was 7.6 (0-26) days. Of those taking aspirin, vaginal  
49  
50 spotting was greater; n=29 (15.1%), non-aspirin n=28 (7.9%) OR 2.1 (95% CI 1.2-3.6).  
51  
52 63 Post-partum haemorrhage > 500mls was also greater; aspirin n=26 (13.5%), no aspirin n=20  
53  
54 (5.6%) OR 2.6 (95% CI 1.4-4.8).  
55  
56  
57  
58  
59  
60

1  
2  
3 66 **Conclusion:** Low-risk nulliparous women are open to taking aspirin in pregnancy and had  
4  
5 67 high levels of adherence. Aspirin use was associated with greater rates of vaginal bleeding.  
6  
7 68 An appropriately powered randomized controlled trial is now required to address the efficacy  
8  
9 69 and safety of universal low dose aspirin in low-risk pregnancy compared to a screening  
10  
11 70 approach.

12  
13 71 **Trial Registration:** [www.isrctn.com/ISRCTN15191778](http://www.isrctn.com/ISRCTN15191778)

14  
15 72 **Funding:** Perinatal Ireland, HRB and the Mother and Baby Clinical Trials Network, HRB

## 16 17 18 73 **ARTICLE SUMMARY**

### 19 20 21 74 **Strengths and limitations of this study**

- 22  
23 75 • Robust multi-centre randomised controlled trial design
- 24  
25 76 • Three methods were used to assess aspirin adherence
- 26  
27 77 • Standardisation of methods
- 28  
29 78 • Potential introduction of reporting bias through open-label design
- 30  
31  
32  
33  
34  
35  
36  
37  
38  
39  
40  
41  
42  
43  
44  
45  
46  
47  
48  
49  
50  
51  
52  
53  
54  
55  
56  
57  
58  
59  
60

## 81 INTRODUCTION

82

83 Low dose aspirin use prior to 16-weeks can reduce the incidence of preeclampsia in at-risk  
84 pregnancies. When commenced at this stage, at a dose of 75mg, its efficacy in low-risk  
85 pregnancies is unknown.<sup>1,2</sup> With the emergence of first trimester screening tests for  
86 preeclampsia such as that of the Fetal Medicine Foundation (FMF), one can predict from 11-  
87 weeks, the risk of preeclampsia.<sup>3</sup> Internationally, there are conflicting consensus statements  
88 on screening methods and which women meet criteria for aspirin use.<sup>4</sup> Application of the  
89 FMF screening test and provision of low dose aspirin to screen positive women can  
90 significantly reduce the incidence of early-onset preeclampsia (4.3% aspirin vs. 1.6% placebo  
91  $p=0.004$ ), although predictive performance of the algorithm appears to vary between  
92 populations.<sup>5</sup> It has been proposed that performance of the FMF algorithm is superior to the  
93 methods recommended by the National Institute of Clinical Excellence and American  
94 College of Obstetricians and Gynecologists (ACOG).<sup>6</sup> It may be more efficacious to  
95 prescribe low dose aspirin universally, although there is no evidence to support such a policy  
96 as yet.<sup>7</sup> To determine this, one must first evaluate if low-risk women are willing to take  
97 aspirin in pregnancy and if undergoing a comprehensive screening test is realistic in the  
98 routine setting. Hence, the primary objective of this multi-center open label feasibility  
99 randomised controlled trial was to evaluate the acceptability and feasibility of women taking  
100 aspirin 75mg from beyond 11-weeks gestation versus screening test-indicated aspirin.  
101 Secondary outcomes included rates of; (i) preeclampsia; (ii) small-for-gestational age infants;  
102 (iii) pre-term delivery; (iv) admission to neonatal intensive care; (v) placental abruption; (vi)  
103 any reported death and; (vii) acceptability of women taking aspirin routinely versus test  
104 indicated aspirin, assessed by a questionnaire.

105

1  
2  
3 106  
4  
5  
6  
7  
8  
9  
10  
11  
12  
13  
14  
15  
16  
17  
18  
19  
20  
21  
22  
23  
24  
25  
26  
27  
28  
29  
30  
31  
32  
33  
34  
35  
36  
37  
38  
39  
40  
41  
42  
43  
44  
45  
46  
47  
48  
49  
50  
51  
52  
53  
54  
55  
56  
57  
58  
59  
60

For peer review only

1  
2  
3 107 **METHODS**

4 108

5  
6 109 **Study Design**

7  
8 110 This open-label feasibility multicenter randomised controlled trial (RCT) was performed in  
9  
10 111 two Irish tertiary maternity hospitals with 18,000 deliveries per annum. The aim was to  
11  
12 112 include three centers, however there was a delay in the local ethics committee decision for  
13  
14 113 the third center (subsequently approved), which was excluded in the interests of study  
15  
16 114 schedule. The protocol for this multicenter randomised controlled trial has been published<sup>8</sup>  
17  
18 115 and was prospectively authorized by the Health Products Regulatory Authority and National  
19  
20 116 Maternity Hospital Central Ethics Committee. The trial was registered with the ISRCTN  
21  
22 117 number 15191778 and was supported by Perinatal Ireland HRB and the HRB Mother and  
23  
24 118 Baby Clinical Trials Network following external peer review for scientific quality. The  
25  
26 119 funder of the study had no role in study design, data collection, data analysis, data  
27  
28 120 interpretation, or writing of the manuscript. An independent Trial Steering Committee and  
29  
30 121 Data Monitoring Committee met quarterly to oversee the safety of the trial participants.  
31  
32

33  
34 122

35  
36 123 Nulliparous women over 18-years-old between 11 to 13+6 weeks gestation with a viable  
37  
38 124 singleton pregnancy that didn't meet criteria for aspirin commencement based upon major  
39  
40 125 preeclampsia risk factors (chronic kidney disease, autoimmune disease e.g. systemic lupus  
41  
42 126 erythematosus, diabetes mellitus and chronic hypertension) were eligible for inclusion and  
43  
44 127 thus were recruited at antenatal booking clinics selected at random.<sup>9</sup> In Ireland it is currently  
45  
46 128 not routine obstetric practice to commence aspirin in women that do not have an  
47  
48 129 aforementioned major risk factor for pre-eclampsia as defined by the National Institute of  
49  
50 130 Health and Clinical Excellence.<sup>9</sup> Exclusion criteria included participants already taking part  
51  
52 131 in a clinical trial, co-existence of fetal congenital anomaly at recruitment or those with aspirin  
53  
54 132 hypersensitivity. All participants provided written informed consent and were recruited by  
55  
56  
57  
58  
59  
60



1  
2  
3 133 the research clinician at the first trimester antenatal booking visit.  
4

5 134  
6

7 135  
8  
9  
10  
11  
12  
13  
14  
15  
16  
17  
18  
19  
20  
21  
22  
23  
24  
25  
26  
27  
28  
29  
30  
31  
32  
33  
34  
35  
36  
37  
38  
39  
40  
41  
42  
43  
44  
45  
46  
47  
48  
49  
50  
51  
52  
53  
54  
55  
56  
57  
58  
59  
60

For peer review only

**136 Randomization**

137 Participants underwent enrollment and online computerized randomization by the study  
138 sonographer or clinician based on blocks of six to; Group 1 - aspirin 75mg from 11 to 13+6  
139 weeks once daily until 36-weeks' gestation; Group 2 - no aspirin and; Group 3 - aspirin  
140 depending on the result of the FMF screening test. Subjects in non-aspirin taking groups had  
141 routine antenatal care. The randomisation sequence was determined prior to study  
142 commencement by the off-site statistician and was concealed from assessors, with both the  
143 assessor and participant seeing the group allocation at the same time, following online  
144 selection.

145

**146 Intervention**

147 Enteric coated Nu-Seals Aspirin (Acetylsalicylic Acid) 75mg orally once daily at night from  
148 11 to 36-weeks gestation was provided free of charge from Alliance Pharma®, which were  
149 independent of study protocol and analysis. A dose of 75mg was used as this is currently the  
150 standard recommended dosage in the UK and Ireland for at-risk women.<sup>9</sup>  
151 Aspirin adherence was assessed subjectively via patient reported diary cards and tablet counts  
152 (checked by research clinician and pharmacist) and objectively via assessment of change in  
153 urinary 11-dehydrothromboxane-B2 (TxB2). Any reduction in TxB2 between first (pre-  
154 aspirin) and second trimester (post-aspirin) levels was taken to suggest that a subject had  
155 ingested aspirin within the last ten days.<sup>10</sup>

156

**157 Baseline review and follow-up**

158 Participants underwent two scheduled study visits, at study recruitment and at 20-22 weeks  
159 (to coincide with their fetal anatomy scan which was performed at the same time) with diary  
160 cards and aspirin tablets returned to the research team at 36-weeks gestation. Participants

1  
2  
3 161 completed an anonymous questionnaire at 20-22 weeks based on acceptability of taking  
4  
5 162 aspirin in pregnancy.

6  
7 163 Study assessments at the time of the recruitment visit included the FMF screening test, the  
8  
9 164 results of which were assessed for those in Group 3 (screen positive and received aspirin (3A)  
10  
11 165 and screen negative no aspirin (3B)). The FMF screening test was not routine practice within  
12  
13 166 Ireland. Components of the screening test included; maternal history (including ovulation  
14  
15 167 induced conception, race, body mass index, age, mother with preeclampsia); mean arterial  
16  
17 168 blood pressure (MAP); uterine artery Doppler pulsatility index; and pregnancy associated  
18  
19 169 plasma protein-A (PAPP-A) and placental like growth factor (PLGF) multiples of the  
20  
21 170 median. To determine risk of preeclampsia, the FMF algorithm was used and based upon a  
22  
23 171 screen positive rate of 5%, a cut off for preeclampsia prior to 42-weeks at greater than 1:8  
24  
25 172 was used.<sup>3</sup> This cut-off was selected with the aim of capturing the majority of pre-eclamptics;  
26  
27 173 both pre and post-term and at the time of study commencement this was the optimal  
28  
29 174 screening algorithm for detection of any preeclampsia. Two un-blinded trained clinical  
30  
31 175 research sonographers performed the first trimester uterine artery Doppler waveforms and  
32  
33 176 MAP and interpreted findings. MAP was assessed using an automated blood pressure  
34  
35 177 monitoring device as outlined by the technique stipulated by the FMF.<sup>11</sup> Uterine artery  
36  
37 178 Doppler velocimetry was obtained using Viewpoint® Version 5.6.16 GE Healthcare, 2012  
38  
39 179 and Voluson Expert 730®, GE 2012 using the technique outlined from by the International  
40  
41 180 Society of Ultrasound in Obstetrics and Gynecology. The pulsatility index was measured  
42  
43 181 from both uterine arteries and an average value was calculated.<sup>12</sup>  
44  
45  
46  
47

48 182

49  
50 183 A maternal blood sample was analyzed for PAPP-A and PLGF under standard conditions  
51  
52 184 using a 6000 DELFIA® Xpress, PerkinElmer, 2014 clinical random access screening  
53  
54 185 platform in the hospital clinical biochemistry laboratory. A quantitative immunoturbimetric  
55  
56  
57  
58  
59  
60

1  
2  
3 186 TxBCardio® immunoassay was used to determine TxB2 levels in urine samples obtained  
4  
5 187 both study visits. These were then standardized as a ratio with creatinine levels and  
6  
7 188 expressed as pg/mg creatinine.  
8

9 189

## 10 190 **Outcomes**

11  
12  
13 191 The primary objective of this study was to evaluate the feasibility and acceptability of low-  
14  
15 192 risk nulliparous women taking aspirin versus test indicated aspirin in pregnancy. Outcome  
16  
17 193 measures included;

18  
19  
20 194 (i) The proportion of eligible women agreeing to participate in a trial where aspirin is  
21  
22 195 prescribed routinely (feasibility);

23  
24 196 (ii) Compliance with study protocol, as measured by the following: (a) adherence to  
25  
26 197 aspirin (acceptability), (b) attendance at study visits (acceptability), (c)  
27  
28 198 satisfactory collection of all endpoints and variables (feasibility), (d) specific  
29  
30 199 study protocol violations (feasibility);

31  
32  
33 200 (iii) The proportion of women in whom it was possible to obtain first trimester trans-  
34  
35 201 abdominal uterine artery Doppler velocimetry examination (feasibility);

36  
37 202 (iv) Proportion of women with a completed screening test who were issued the  
38  
39 203 screening result within one week of having the test performed (feasibility);  
40

41  
42 204

43  
44 205 Secondary outcomes included rates of; (i) preeclampsia; (ii) small-for-gestational-age (SGA)  
45  
46 206 infants (customised sex-specific birth-weight <10<sup>th</sup> centile); (iii) pre-term delivery prior to  
47  
48 207 34-weeks; (iv) admission to neonatal intensive care unit (NICU); (v) placental abruption; (vi)  
49  
50 208 any reported death (stillbirth, neonatal or infant death) and; (vii) acceptability of women  
51  
52 209 taking aspirin routinely versus test indicated aspirin as assessed by an anonymous  
53  
54 210 questionnaire at 20-22 weeks. As part of routine antenatal care women had an appointment  
55  
56  
57  
58  
59  
60

1  
2  
3 211 with their midwife and or clinician at booking (11-14 weeks), 16-weeks, 18-20 weeks, 25-  
4  
5 212 weeks, 28-weeks, 31-weeks, 34-weeks, 36-weeks, 28-weeks, 40-weeks and 41-weeks  
6  
7 213 gestation in line with hospital protocol. At each visit blood pressure was assessed using  
8  
9 214 mercury sphygmomanometry and a urine dipstick for proteinuria was performed with  
10  
11 215 symphysio-fundal-height and or fetal biometrical ultrasound assessment as appropriate. -  
12  
13 216 was defined based upon the definition from the ISSHP with new onset hypertension  
14  
15 217 (>140mmHg systolic or >90mmHg diastolic) after 20-weeks gestation associated with; (i)  
16  
17 218 proteinuria of at least 1g/L [2+] on urine dipstick testing, and or; (ii) maternal organ  
18  
19 219 dysfunction ; an or fetal growth restriction.<sup>13</sup> Suspicion of a diagnosis of pre-eclampsia at an  
20  
21 220 antenatal visit prompted further investigation in the fetal assessment unit with clinical  
22  
23 221 examination, blood testing (urea and creatinine, liver function tests and full blood picture),  
24  
25 222 24-hour urine collection for proteinuria and departmental fetal ultrasound assessment with  
26  
27 223 final diagnosis made by an obstetrician.  
28  
29  
30  
31 224

32  
33 225 Safety data were reported as adverse and serious adverse events and participants discontinued  
34  
35 226 from the study were recorded in addition to the reason for discontinuation and outcome. As  
36  
37 227 an assessment of post-partum haemorrhage, blood loss was weighed at time of delivery.  
38  
39  
40  
41

## 42 229 **Statistical Analysis**

43  
44 230 As outlined in the published study protocol, the projected sample size for this study was 500  
45  
46 231 women across two sites with 18,000 deliveries per annum.<sup>8</sup> To determine preeclampsia as a  
47  
48 232 primary outcome; the anticipated number of patients required is over 15,000 women. As this  
49  
50 233 study aimed to determine the feasibility of such a study, 500 participants were more than  
51  
52 234 adequate as 3% of the number required for a substantive study is required (n=450).<sup>14</sup>  
53  
54 235 Accounting for a drop-out rate of 10% (n=45), 500 participants were adequate to obtain the  
55  
56  
57  
58  
59  
60

1  
2  
3 236 primary outcome. Analysis was performed by a statistician using SAS v.20 on the intention-  
4  
5 237 to-treat (ITT) population, which included all participants randomised, which completed the  
6  
7 238 full second trimester assessment. Measures of variance included standard deviation. Follow-  
8  
9 239 up of serious adverse events continued until 28-days following delivery. Adverse events were  
10  
11 240 reported as odds ratios (OR) and uncertainty was expressed using 95% confidence intervals.  
12  
13 241 No hypothesis tests were performed.  
14  
15

16 242

17 243

18 244

19 245

20 246

### 21 247 **Patient Involvement**

22 248 Although patients were not directly involved in devising the study protocol and design the  
23 249 burden of the RCT intervention (i.e. taking aspirin and undergoing the FMF screening test)  
24 250 was assessed by means of an anonymous questionnaire completed at 20-22 weeks gestation.  
25 251 At the time of study participation subjects were informed that study results could be viewed  
26 252 following publication on the study website; <http://perinatalireland.ie/research/test/>  
27  
28  
29  
30  
31  
32  
33  
34

35 253

36 254

37

38

39

40

41

42

43

1  
2  
3 255 **RESULTS**

4  
5 256 Subjects were recruited between 8<sup>th</sup> May 2014 to 23<sup>rd</sup> September 2015 with follow-up of  
6  
7 257 participants until 11<sup>th</sup> April 2016, when the study was ended by the steering committee  
8  
9 258 following delivery of the final patient as the target sample size had been achieved. In total  
10  
11 259 1054 eligible women were approached to take part in the study and of these, 557 underwent  
12  
13 260 randomization [Figure 1]. In the screen and treat population (Group 3) n=184, 13 (7.1%)  
14  
15 261 women had a risk of developing preeclampsia >1:8 and subsequently commenced aspirin  
16  
17 262 until 36-weeks gestation. Eleven women were excluded from the study leaving 546 in the  
18  
19 263 ITT population. In total there were 192 women in the ITT group that were taking aspirin as  
20  
21 264 per randomization and 354 not taking aspirin. Baseline characteristics were similar and the  
22  
23 265 summaries are presented in Table 1.  
24  
25

26  
27 266

| Characteristic                              | Low Dose Aspirin<br>N=179 | No Aspirin<br>N=183 | Screen & Treat<br>N=184 |
|---------------------------------------------|---------------------------|---------------------|-------------------------|
| Age (yr)                                    | 33 (19-44)                | 34 (18-43)          | 33 (19-44)              |
| Race – No. (%)                              |                           |                     |                         |
| White                                       | 181 (97.9)                | 179 (95.7)          | 180 (97.3)              |
| Black                                       | 1 (0.5)                   | 2 (1.1)             | 0 (0)                   |
| Asian                                       | 3 (1.6)                   | 6 (3.2)             | 5 (2.7)                 |
| Other                                       | 0                         | 0 (0)               | 0 (0)                   |
| Completed secondary school – No.(%)         | 136 (73.5)                | 143 (76.4)          | 152 (82.2)              |
| BMI (kg/m <sup>2</sup> )                    | 25.2 (17.4-39.4)          | 22.9 (17.7-41.4)    | 23.8 (18.1-45.2)        |
| Gestational Age (wks)                       | 12.9 (11.1-13.9)          | 12.9 (11.1-13.9)    | 12.9 (11.3-13.9)        |
| Smoking – No. (%)                           | 17(9.2)                   | 11 (5.9)            | 7 (3.8)                 |
| Subject's mother had preeclampsia - No. (%) | 7 (3.8)                   | 10 (5.4)            | 10 (5.4)                |
| Conception – No. (%)                        |                           |                     |                         |
| IVF                                         | 5 (2.7)                   | 9 (4.8)             | 8 (4.3)                 |
| ICSI                                        | 3 (1.6)                   | 4 (2.1)             | 3 (1.6)                 |
| Ovulation induction                         | 5 (2.7)                   | 6 (3.2)             | 6 (3.2)                 |
| Spontaneous                                 | 172 (93.0)                | 168 (89.9)          | 170 (91.9)              |
| Previous miscarriage – No.                  | 20 (10.8)                 | 31 (16.6)           | 31 (16.8)               |

|     |  |  |  |
|-----|--|--|--|
| (%) |  |  |  |
|-----|--|--|--|

267

268 Table 1: Baseline characteristics of the study population. Where number (No.) percentage is

269 not expressed average and range are demonstrated.

270

271

### 272 **Primary outcomes**

273

274 (i) The proportion of eligible women agreeing to participate in a trial where aspirin is

275 prescribed routinely (feasibility); 1054 women were approached that were eligible to partake.

276 497 were subsequently not enrolled as they did not want to take aspirin n=454 or for an

277 alternative reason n=43 e.g. appointment did not suit. Hence 546/1054 (51.8%) women were

278 willing to partake in a study where they may have to take aspirin routinely.

279

280 (ii) Compliance with study protocol, as measured by the following: (a) adherence to aspirin

281 (acceptability), (b) attendance at study visits (acceptability), (c) satisfactory collection of all

282 endpoints and variables (feasibility), (d) specific study protocol violations (feasibility);

283

284 (a) Of those women included in analysis that were taking aspirin (n=192), the average

285 adherence based upon patient reported diary cards was 96.0% and based upon tablet counts

286 95.0%. Seven women were non-adherent and 19 (10.0%) poorly compliant (<80%).

287 Average adherence was 95.0% in both the test indicated aspirin group (3a) and routine aspirin

288 group (1) [Table 2]. The median first trimester pre-aspirin urine TxB2 level was 8662.2

289 pg/mg (IQR 2014.5-9931.5) and second trimester (post-aspirin) 2285.1 pg/mg (IQR 591.0-

290 2300.1). The percentage change in TxB2 was then assessed for all paired samples (n=147)

291 and found that 124/147 (84.4%) of subjects had a fall in TxB2 levels between the first and

292 second trimesters versus 23/147 (15.6%) who had an increase. The greater the reduction in

293 urinary TxB2 pre- and post- aspirin dose the greater the degree of aspirin adherence, as



1  
2  
3 294 demonstrated in Figure 2. Patient groups were similar (routine aspirin and screen positive  
4  
5 295 aspirin) and percentage change in urine TxB2.  
6

7 296

8  
9 297 (b) Of those that underwent randomization (n=557), eleven were excluded prior to fulfillment  
10  
11 298 of study participation requirements (attendance at second study visit). Of the eleven, three  
12  
13 299 withdrew consent for participation as they decided that they did not wish to take aspirin  
14  
15 300 following randomization.  
16

17 301

18  
19  
20 302 (c) Of all 546 subjects collection of outcome measures and variables were obtained for all  
21  
22 303 apart from the questionnaire on patient acceptability, which was completed in 97.1%  
23  
24 304 (530/546).  
25

26 305

27  
28  
29 306 d) Six protocol violations were recorded (0.01 per 100 participants) including women  
30  
31 307 transferring care to another hospital (n=3), incorrect randomization of women that did not  
32  
33 308 meet inclusion criteria (n=2) and a subject in the non-aspirin group commencing aspirin by  
34  
35 309 their clinician (n=1).  
36

37 310

38  
39  
40 311 (iii) The proportion of women in whom it was possible to obtain first trimester trans-  
41  
42 312 abdominal uterine artery Doppler velocimetry (feasibility); The FMF screening test was  
43  
44 313 completed in 98.4% (181/184) following successful uterine artery Doppler velocimetry  
45  
46 314 acquisition, of which one was obtained vaginally due to challenges with abdominal  
47  
48 315 acquisition, with an overall sonographer reported ease of acquisition 3.1 (SD +/- 0.91) (score  
49  
50 316 1 (easy) to 5 (unobtainable)) [Table 2].  
51

52 317  
53  
54  
55  
56  
57  
58  
59  
60

318 (iv) Proportion of women with a completed screening test, issued the result within one week  
 319 of the test (feasibility); The average time to obtain laboratory analyzed PAPP-A and PLGF so  
 320 that a screening result could be issued was 7.6 days (0-26) with 78 (42.4%) of women  
 321 waiting greater than one week and five women being beyond 16-weeks prior to result  
 322 availability [Table 2].

323

324

325

326

327

328

329

330

331

| Adherence and feasibility parameter | Low-dose Aspirin (N=179) | No Aspirin (N=183) | Screen & Treat (N=184) |
|-------------------------------------|--------------------------|--------------------|------------------------|
| Ease of Doppler acquisition         |                          |                    |                        |
| Very easy                           |                          |                    | 8 (4%)                 |
| Easy                                |                          |                    | 53 (29%)               |
| Fair                                |                          |                    | 61 (33%)               |
| Difficult                           |                          |                    | 60 (32%)               |
| Unobtainable                        |                          |                    | 3 (2%)                 |
| Days to PLGF/PAPPA visit 1          |                          |                    | 7.6<br>[0 - 26]        |
| PLGF/PAPPA result > 16 weeks        |                          |                    | 5 (3%)                 |
| Time taken for visit 1 (mins)       | 60<br>[30 – 100]         | 60<br>[25 - 90]    | 60<br>[25 - 90]        |
| Median adherence tablet counts      | 96%                      |                    | 95% (screen positive)  |

|                              |        |  |                       |
|------------------------------|--------|--|-----------------------|
| Median adherence diary cards | 94%    |  | 95% (screen positive) |
| Non-adherent                 | 7 (4%) |  | 0 (0%)                |

332

333

334 Table 2: Primary outcomes of feasibility and adherence

335

336

337

For peer review only

1  
2  
3 338 **Secondary outcomes**

4  
5 339 There was no difference between groups in relation to secondary outcomes [Table S1  
6  
7 340 supplementary]. For the overall cohort, there were three cases (0.37%) of early onset  
8  
9 341 preeclampsia <34-weeks (0.55%), n=22 (4.03%) any preeclampsia, n=57 (10.44%) SGA  
10  
11 342 infants and 15.02% (n=82) placental disease. Secondary outcomes for groups 3A (screen  
12  
13 343 positive aspirin) and 3B (screen negative no aspirin) are demonstrated in Table S2  
14  
15 344 [supplementary]. Despite taking aspirin, there remained a greater number with preeclampsia  
16  
17 345 at <37-weeks in the screen positive versus the screen negative group, although numbers were  
18  
19 346 small (n=2 (15.4%) vs. n=2 (1.2%). In terms of taking aspirin in a subsequent pregnancy, the  
20  
21 347 questionnaire revealed that 92.3% (489/530) were willing to take aspirin in a subsequent  
22  
23 348 pregnancy; 92.5% (173/187) of aspirin takers and 91.5% (314/343) of non-aspirin takers.  
24  
25  
26 349

1  
2  
3 350 **Safety**

4 351

5 352 The adverse event profile differed between groups but not the serious adverse event profile

6  
7 353 [Tables 3 and S3 (supplementary)]. There were six perinatal deaths, all of which underwent

8  
9 354 postmortem. In the aspirin group there was one placental abruption and one case of

10  
11 355 intervillous haemorrhage. Perinatal deaths in the non-aspirin groups were due to delayed

12  
13 356 villous maturation, severe FGR, fetal thrombotic vasculopathy and neonatal septicemia.

14  
15 357 There was an observable difference between groups in terms of reported vaginal spotting

16  
17 358 aspirin 15.1% vs. non-aspirin 7.9% OR 2.1 (CI 1.2-3.6), which was not associated with

18  
19 359 pregnancy loss. Similarly, the rate of PPH >1000mls was higher in the aspirin group.

20  
21 360 However, the numbers were small. Rates of blood transfusion or significant hemoglobin

22  
23 361 drop to <8g/dL were similar.  
24  
25  
26  
27  
28  
29  
30  
31  
32  
33  
34  
35  
36  
37  
38  
39  
40  
41  
42  
43  
44  
45  
46  
47  
48  
49  
50  
51  
52  
53  
54  
55  
56  
57  
58  
59  
60

| Event                           |                                 | Aspirin<br>n=192 | Non-aspirin<br>n=354 | Odds ratio<br>(95% CI) |
|---------------------------------|---------------------------------|------------------|----------------------|------------------------|
| <b>Adverse Events</b>           |                                 |                  |                      |                        |
| Adverse Events Total No.        |                                 | 123              | 143                  | 2.6 (1.8-3.8)          |
| Vaginal spotting No. (%)        |                                 | 29(15.1)         | 28 (7.9)             | 2.1 (1.2-3.6)          |
| Post-partum haemorrhage No. (%) |                                 |                  |                      |                        |
| >500mls                         |                                 | 26(13.5)         | 20 (5.6)             | 2.6 (1.4-4.8)          |
| >1000mls                        |                                 | 7 (3.6)          | 5 (1.4)              | 2.8 (0.9-9.0)          |
| Blood transfusion               |                                 | 3                | 4                    | 0.5 (0.1-2.7)          |
| Hb drop <8g/dL                  |                                 | 4                | 7                    | 0.3 (0.1-1.4)          |
| <b>Serious Adverse Event</b>    |                                 |                  |                      |                        |
| NICU admission                  | Sepsis                          | 3                | 2                    |                        |
|                                 | Hypoglycaemia                   | 0                | 1                    |                        |
|                                 | Prematurity                     | 1                | 4                    |                        |
|                                 | Jaundice                        | 1                | 1                    |                        |
|                                 | Persistently low Apgar          | 1                | 3                    |                        |
|                                 | TTN                             | 1                | 3                    |                        |
|                                 | Meconium aspiration             | 1                | 0                    |                        |
|                                 | Hypoxic ischemic encephalopathy | 1                | 1                    |                        |
|                                 | Very low birthweight            | 0                | 1                    |                        |
| Total                           |                                 | 9                | 16                   | 1.04 (0.45-2.40)       |
| Perinatal Death                 |                                 | 2                | 4                    |                        |
| Total                           |                                 | 2                | 4                    | 0.92 (0.17-5.10)       |
| Maternal admission              | Preterm labor                   | 3                | 2                    |                        |
|                                 | Preeclampsia                    | 8                | 7                    |                        |
|                                 | Antepartum hemorrhage           | 3                | 7                    |                        |
|                                 | PPROM                           | 0                | 2                    |                        |
|                                 | Fetal compromise                | 1                | 2                    |                        |
|                                 | Infection                       | 2                | 5                    |                        |
|                                 | Other                           | 4                | 1                    |                        |
| Total                           |                                 | 21               | 26                   | 1.55 (0.85-2.83)       |
| Congenital anomaly              | Cardiac                         | 1                | 2                    |                        |
|                                 | Gastrointestinal                | 3                | 2                    |                        |
|                                 | Neurological                    | 0                | 1                    |                        |
|                                 | Renal                           | 0                | 1                    |                        |
| Total                           |                                 | 4                | 6                    | 1.23 (0.34-4.43)       |
| Total serious adverse events    |                                 | 36               | 52                   | 1.34 (0.84-2.14)       |

362

1  
2  
3 363

4  
5 364 Table 3: Adverse and serious adverse events in aspirin and non-aspirin taking groups. There  
6  
7 365 may be >1 adverse event or serious adverse event per subject [NICU=Neonatal intensive care  
8  
9 366 unit, TTN= transient tachypnea of the newborn, PPOM= preterm premature rupture of  
10  
11 367 membranes, Very low birthweight = <1500g].

12  
13 368  
14  
15  
16  
17  
18  
19  
20  
21  
22  
23  
24  
25  
26  
27  
28  
29  
30  
31  
32  
33  
34  
35  
36  
37  
38  
39  
40  
41  
42  
43  
44  
45  
46  
47  
48  
49  
50  
51  
52  
53  
54  
55  
56  
57  
58  
59  
60

1  
2  
3 369 **DISCUSSION**

4 370

5  
6 371 **Main Findings**

7  
8 372 This feasibility randomised controlled trial has found that low-risk nulliparous women were  
9  
10 373 open to taking aspirin in pregnancy and were adherent, with a willingness to take it again in a  
11  
12 374 subsequent pregnancy. We can say this as, comparing findings to other RCTs in pregnancy,  
13  
14 375 of which there are few, the uptake in this RCT was much higher as was adherence (e.g.  
15  
16 376 Chiswick, *et al.* 2015; 35% enrolment and 65-67% adherence with metformin use).<sup>15</sup> This is  
17  
18 377 the first trial of its kind, which has assessed the acceptability of women taking aspirin in low-  
19  
20 378 risk pregnancy and the feasibility of an integrated screening test in a routine clinical setting.  
21  
22

23 379

24  
25 380 **Strengths and Limitations**

26  
27 381 The strengths of this study are the multicenter RCT design with robust protocol and over-  
28  
29 382 sight and previously published methodology. Allocation bias was limited by use of a  
30  
31 383 prospective approach and selection bias was limited by randomization. The fact that the  
32  
33 384 same two sonographers and biochemists were responsible for conducting the screening test  
34  
35 385 with use of quality control standards for test completion using the same equipment and  
36  
37 386 technique for all subjects optimized reproducibility. There were a low number of dropouts  
38  
39 387 and almost all patient outcomes were recorded. Although there is currently no validated  
40  
41 388 scientific method of assessing aspirin adherence,<sup>16</sup> a laboratory assessment of change in  
42  
43 389 TxB2 served as a more objective assessment, strengthening reliability. There is currently no  
44  
45 390 accepted test in the literature, which can reliably determine aspirin adherence, hence three  
46  
47 391 different methods were used to optimize reliability.<sup>16</sup> Study weaknesses, were primarily that  
48  
49 392 PAPP-A and PLGF analysis was performed in the laboratory using validated methods with  
50  
51 393 quality assurance, as opposed to the bedside point-of-care tests hence it took longer to obtain  
52  
53 394 a result. In a non-research setting with a greater throughput of patients, one could anticipate a  
54  
55  
56  
57  
58  
59



1  
2  
3 395 faster turnaround time. Additionally the open-label nature of the study meant that safety  
4  
5 396 recording was open to reporting bias and, as is often the case with RCTs the uptake of  
6  
7 397 subjects demonstrated dominance for educated women. In RCTs there is always a risk of  
8  
9 398 introducing a Hawthorne effect, whereby subjects act differently in the confines of an RCT as  
10  
11 399 to how they would in a real-life setting, hence adherence rates may have been over-  
12  
13 400 represented.<sup>17</sup> A third trimester visit may have added strength to the study to assess  
14  
15 401 objectively for aspirin adherence and patient satisfaction, however as adherence prior to 16-  
16  
17 402 weeks was deemed the critical time point for preeclampsia prevention, follow-up at 20-22  
18  
19 403 weeks was selected.  
20  
21

22 404

#### 23 24 405 **Interpretation**

25  
26 406 A recently published large RCT from the FMF found that, following application of FMF  
27  
28 407 screening and subsequent randomization of women deemed to be at risk of preterm  
29  
30 408 preeclampsia to aspirin 150mg versus placebo, there was a reduction in the incidence of  
31  
32 409 preterm preeclampsia in the aspirin arm.<sup>5</sup> Our study differs on several counts; (i) routine  
33  
34 410 aspirin arm – use of a third arm assessing provision of routine aspirin assessed the  
35  
36 411 acceptability and feasibility of this policy; (ii) aspirin dosage (150mg vs. 75mg) – in light of  
37  
38 412 limited evidence on dosage and effect, the safest lowest effective dose was selected. A recent  
39  
40 413 meta-analysis, published since completion of this study suggests that there is an aspirin dose-  
41  
42 414 response effect, with higher doses of aspirin commenced prior to 16-weeks gestation,  
43  
44 415 associated with a greater reduction in preeclampsia and fetal growth restriction compared to  
45  
46 416 standard lower doses.<sup>18</sup> When supported by robust safety data when using higher dosing, this  
47  
48 417 is something to consider in future studies and clinical practice; (iii) adverse events – rates of  
49  
50 418 PPH and vaginal bleeding were reported. This information would be useful from the FMF  
51  
52  
53  
54  
55  
56  
57  
58  
59

1  
2  
3 419 study in light of the higher aspirin dosing regime and; (iv) our study was not powered to  
4  
5 420 detect a difference in clinical outcome, with the primary focus feasibility and acceptability.

6  
7 421

8  
9 422 Few studies have assessed the acceptability of non-routine medications in pregnancy. In the  
10  
11 423 developing world, pregnant women are willing to take calcium, oral iron and  
12  
13 424 micronutrients.<sup>19-21</sup> If instructed about potential side-effects and reminded frequently  
14  
15 425 women had higher levels of adherence with the greatest barrier being forgetfulness. Average  
16  
17 426 medication adherence in pregnancy for chronic illness is higher than for non-routine  
18  
19 427 medications at 90-95%,<sup>22</sup> hence it is promising that we have noted a rate as high as this in  
20  
21 428 our own study. There was a slight discrepancy in adherence assessed via tablet counts and  
22  
23 429 diary cards and that more objectively assessed via TxB2. Reasons for this may include the  
24  
25 430 potential for aspirin resistance; which although not formally assessed in this study can be  
26  
27 431 increased when using an enteric-coated preparation.<sup>23</sup>

28  
29  
30  
31 432

32  
33 433 The FMF screening test was feasible in terms of acquiring first trimester uterine artery  
34  
35 434 Doppler velocimetry measurements, though delays were encountered in obtaining laboratory  
36  
37 435 analyzed PAPP-A and PLGF. This is relevant as it reflects the practical aspects of such a  
38  
39 436 screening test in a clinical real life setting. Improved protocols between the clinical and  
40  
41 437 laboratory staff would be required to allow patients receive results within a reasonable  
42  
43 438 timeline.

44  
45  
46 439

47  
48 440 In terms of vaginal spotting and clinically significant PPH with aspirin use, the findings of  
49  
50 441 this study are comparable with previous studies although evidence of increased antenatal and  
51  
52 442 postnatal bleeding, requires further investigation, most notably with use of aspirin at doses  
53  
54 443 greater than 75mg.<sup>24-25</sup> Due to the open-label nature of this study as opposed to placebo

1  
2  
3 444 control, there is always a potential of reporting bias of bleeding in the aspirin arms. Although  
4  
5 445 generally safe in pregnancy, it may be worthwhile considering cessation of aspirin at 32-34  
6  
7 446 weeks gestation with the aim of reducing the risk of PPH, as opposed to 36-weeks and of  
8  
9 447 informing women of the unwanted side-effect of increased vaginal spotting.  
10

11 448

### 13 449 **Conclusion**

14 450

15  
16  
17 451 It has been proposed that the most cost-effective approach to reducing preeclampsia is the  
18  
19 452 provision of an effective, affordable and safe intervention applied to all mothers without prior  
20  
21 453 testing to assess levels of risk.<sup>7</sup> A algorithm-based screen-and-treat approach, as proposed by  
22  
23 454 the FMF has can reduce rates of pre-term preeclampsia when doses of 150mg of aspirin are  
24  
25 455 used. This study was not powered to detect a difference in rates of preeclampsia between  
26  
27 456 groups, yet has taken the first step to address if low-risk nulliparous women are open to  
28  
29 457 taking aspirin in the first instance and if a screening algorithm is feasible. Moving forward,  
30  
31 458 an RCT is required to address the efficacy of universal low dose aspirin in low-risk  
32  
33 459 pregnancy compared to a screening approach. This will require significant numbers due to  
34  
35 460 the low incidence of early-onset preeclampsia. Although women were open to taking aspirin  
36  
37 461 in pregnancy compared to other RCTs involving medication, almost twice the number  
38  
39 462 enrolled had to be approached to obtain adequate study participants. This must be considered  
40  
41 463 when planning a future trial.  
42  
43  
44

45 464

46 465

1  
2  
3 466 **COMPETING INTERESTS STATEMENT:** Authors report no conflict of interest

4  
5 467

6  
7 468 **FUNDING STATEMENT:** This work was supported by Perinatal Ireland, HRB and HRB

8  
9 469 Mother and Baby Clinical Trials Network.

10  
11 470

12  
13 471 **CONTRIBUTION OF AUTHORSHIP:** (i) Conceived and designed the experiments: FM,

14  
15 472 CM, PMcP, FB, PD, DM, MC, AS, FC, JM, SD, JH, AC, ET, PD, ZA, FDM, FMcA; (ii)

16  
17 473 Performed the experiments: FM, CM, FC ; (iii) Analyzed the data: FM, PD, ZA, FMcA; (iv)

18  
19 474 Contributed reagents/materials/analysis/tools: PMcP, FB, PD, DM, MC, AS, JM, SD, JH,

20  
21 475 AC, AH, ET, PD, ZA, FDM, FMcA; (v) Wrote the paper: FM, CM, PMcP, FB, PD, DM,

22  
23 476 MC, AS, FC, JM, SD, JH, AC, AH, ET, PD, ZA, FDM, FMcA

24  
25 477

26  
27 478 **ACKNOWLEDGEMENTS:** The women that took part in the study

28  
29 479

30  
31 480 **DATA SHARING STATEMENT:** Dataset available from corresponding author on request

32  
33 481

34  
35 482

36  
37 483

38  
39

40  
41

42  
43

44  
45

46  
47

48  
49

50  
51

52  
53

54  
55

56  
57  
58  
59  
60

1  
2  
3 484 **REFERENCES**

4 485

- 5  
6 486 1. Henderson JT, Whitlock EP, O'Connor E, Senger CA, Thompson GH, Rowland MG.  
7  
8 487 Low-dose aspirin for prevention of morbidity and mortality from preeclampsia: A  
9  
10 488 systematic evidence review from the U.S. Preventative Services Task Force. *Ann*  
11  
12 489 *Intern Med.* 2014; 160: 695-703
- 13  
14  
15 490 2. Sibai BM, Caritis SN, Thom E, Klebanoff M, McNellis D, Rocco L, *et al.* Prevention  
16  
17 491 of preeclampsia with low-dose aspirin in healthy, nulliparous pregnant women. The  
18  
19 492 National Institute of Child Health and Human Development Network of Maternal-  
20  
21 493 Fetal Medicine Units. *N Eng J Med* 1993; 329(17): 1213-8
- 22  
23  
24 494 3. Akolekar R, Syngelaki A, Poon L, Wright D, Nicolaides KH. Competing risks model  
25  
26 495 in early screening for preeclampsia by biophysical and biochemical markers. *Fetal*  
27  
28 496 *Diagn Ther.* 2013;33(1): 8-15
- 29  
30  
31 497 4. Mone F, Mulcahy C, McParland, McAuliffe FM. Should we recommend universal  
32  
33 498 aspirin for all pregnant women? *Am J Obstet Gynecol.* 2017; 216(2): 141.e1-141.e5
- 34  
35  
36  
37 499 5. Rolnik DL, Wright D, Poon LC, O'Gorman N, Syngelaki A, de Paco Matallaa C, *et*  
38  
39 500 *al.* Aspirin versus placebo in pregnancies at high risk for preterm preeclampsia. *N*  
40  
41 501 *Eng J Med* 2017; 377: 613-22
- 42  
43 502 6. O'Gorman N, Wright D, Poon LC, Rolnik DL, Syngelaki A, de Alvarado M, *et al.*  
44  
45 503 Multicenter screening for preeclampsia by maternal factors and biomarkers at 11-13  
46  
47 504 weeks' gestation: comparison to NICE guidelines and ACOG recommendations.  
48  
49 505 *Ultrasound Obstet Gynecol* 2017; 49(6):756-760

50  
51  
52 506  
53  
54  
55  
56  
57  
58  
59  
60

- 1  
2  
3 507 7. Meads CA, Cnossen JS, Meher S, Juarez-Garcia A, ter Riet G, Duley L, *et al.*  
4  
5 508 Methods of prediction and prevention of pre-eclampsia: systematic reviews of  
6  
7 509 accuracy and effectiveness literature with economic modelling. *Health Technol*  
8  
9 510 *Assess.* 2008;12(6).
- 11  
12 511 8. Mone F, Mulcahy C, McParland P, *et al.* An open-labeled controlled trial of low dose  
13  
14 512 aspirin with an early screening test for pre-eclampsia and growth restriction (TEST):  
15  
16 513 Trial Protocol. *Contemp Clin Trials* 2016; 49: 143-8
- 18  
19 514 9. NICE. Guideline CG107 : Hypertension in Pregnancy : The management of  
20  
21 515 hypertensive disorders during pregnancy. National Institute for Health and Clinical  
22  
23 516 Excellence 2010. (Accessed Sept 5, 2016, at  
24  
25 517 <https://www.nice.org.uk/guidance/cg107>)
- 27  
28 518 10. Perneby C, Vahter M, Akesson A, Bremme K, Hjemdahl P. Thromboxane metabolite  
29  
30 519 excretion during pregnancy – influence of preeclampsia and aspirin treatment.  
31  
32 520 *Thromb Res* 2011;127(6):605-6
- 34  
35 521 11. Poon LCY, Zymery NA, Zamprakou A, Syngelaki A, Nicolaides KH. Protocol for  
36  
37 522 measurement of mean arterial pressure at 11-13 weeks' gestation. *Fetal Diagn Ther.*  
38  
39 523 2012;31(1):42-48
- 41  
42 524 12. Bhide A, Acharya G, Bilardo CM, Brezinka C, Cafici D, Hernandez-Andrade E, *et al.*  
43  
44 525 ISUOG Practice guidelines: use of Doppler ultrasonography in obstetrics. *Ultrasound*  
45  
46 526 *Obstet Gynecol.* 2013; 41(2), 233-239
- 47  
48 527 13. International society for the study of hypertension in pregnancy. The classification,  
49  
50 528 diagnosis and management of the hypertensive disorders of pregnancy: A revised  
51  
52 529 statement from the ISSHP. *Pregnancy Hypertension: An International Journal of*  
53  
54 530 *Women's Cardiovascular Health* 2014;4:97-104
- 55  
56 531

- 1  
2  
3 532 14. Billingham SAM, Whitehead AL, Julious SA. An audit of sample sizes for pilot and  
4  
5 533 feasibility trials being undertaken in the United Kingdom registered in the United  
6  
7 534 Kingdom Clinical Research Network database. *BMC Med Res Methodol* 2013;13:104  
8  
9 535 15. Chiswick C, Reynolds RM, Denison F, Drake AJ, Forbes S, Newby DE, *et al.* Effect  
10  
11 536 of metformin on maternal and fetal outcomes in obese pregnant women  
12  
13 537 (EMPOWaR): a randomised, double-blind, placebo-controlled trial. *Lancet Diabetes*  
14  
15 538 *Endocrinol* 2015;3(10):778-786  
16  
17  
18 539 16. Navaratnam K, Alfirevic A, Alfirevic Z. Low dose aspirin and pregnancy: how  
19  
20 540 important is aspirin resistance? *BJOG* 2016;123(9):1481-7  
21  
22 541 17. McCambridge J, Witton J, Elbourne DR. Systematic review of the Hawthorne effect:  
23  
24 542 New concepts are needed to study research participation effects. *J Clin Epidemiol*  
25  
26 543 2014; 67(3): 267-77  
27  
28  
29 544 18. Roberge S, Nicolaides K, Demers S, Hyett J, Chaillet N, Bujold E. The role of  
30  
31 545 aspirin dose on the prevention of preeclampsia and fetal growth restriction: systematic  
32  
33 546 review and meta-analysis. *Am J Obstet Gynecol* 2017;216(2):110-20  
34  
35 547 19. Thapa K, Sanghvi H, Rawlins B, Karki YB, Regmi K, Arval S, *et al.* Coverage,  
36  
37 548 compliance, acceptability and feasibility of a program to prevent pre-eclampsia and  
38  
39 549 eclampsia through calcium supplementation for pregnant women: an operations  
40  
41 550 research study in one district of Nepal. *BMC Pregnancy Childbirth.* 2015; 16: 241  
42  
43  
44 551 20. Kulkarni B, Christian P, LeClerq SC, Khattri SK. Determinants of compliance to  
45  
46 552 antenatal micronutrient supplementation and women's perceptions of supplement use  
47  
48 553 in rural Nepal. *Public Health Nutr.* 2010; 13(1): 82-90  
49  
50 554 21. Seck BC and Jackson RT. Determinants of compliance with iron supplementation  
51  
52 555 among pregnant women in Senegal. *Public Health Nutr.* 2008; 11(6): 596-605  
53  
54  
55 556 22. De Jonge L, de Walle HEK, de Jong-van den Berg LTW, van Langen IM, Bakker

- 1  
2  
3 557 MK. Actual Use of Medications Prescribed During Pregnancy: A Cross-Sectional  
4  
5 558 Study Using Data from a Population-Based Congenital Anomaly Registry. *Drug Saf.*  
6  
7 559 2015; 38: 737-47  
8  
9 560 23. Caron N, Rivard GE, Michon N, Morin F, Pilon D, Moutquin JM, Rey E. Low dose  
10  
11 561 ASA response using the PFA-100 in women with high risk pregnancy. *J Obstet*  
12  
13 562 *Gynaecol Can.* 2009; 31: 1022-7  
14  
15 563 24. Schisterman EF, Silver RM, Leshner LL, Faraggi D, Wactawski-Wende J, Townsend  
16  
17 564 JM, *et al.* Preconception low-dose aspirin and pregnancy outcomes: results from the  
18  
19 565 EAGeR randomised trial. *Lancet.* 2014; 384: 29-36  
20  
21 566 25. Golding J. A randomised trial of low dose aspirin for primiparae in pregnancy: The  
22  
23 567 Jamaica Low Dose Aspirin Study Group. *BJOG.* 1998; 105(3): 293-9  
24  
25  
26 568  
27  
28 569

30  
31 **FIGURE LEGENDS**

- 32 571  
33 572 Figure 1 - Consort diagram  
34  
35 573 Figure 2 - Histogram demonstrating percentage change in urinary thromboxane-B2 levels  
36  
37 574 pre- and post - aspirin administration (n=147) [TxB2 = urinary-thromboxane level]  
38  
39 575  
40  
41 576  
42  
43 577  
44  
45  
46  
47  
48  
49  
50  
51  
52  
53  
54  
55  
56  
57  
58  
59  
60



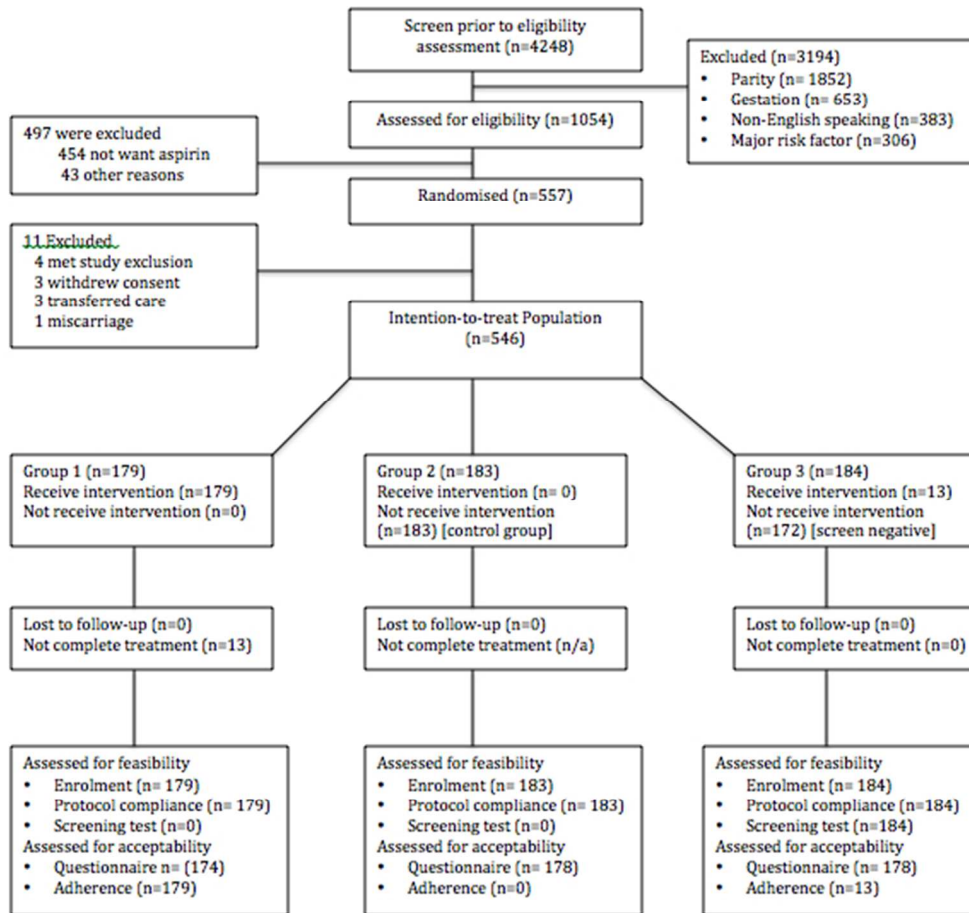

Figure 1 – Consort diagram

Figure 1 - consort diagram

206x206mm (72 x 72 DPI)

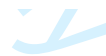

1  
2  
3  
4  
5  
6  
7  
8  
9  
10  
11  
12  
13  
14  
15  
16  
17  
18  
19  
20  
21  
22  
23  
24  
25  
26  
27  
28  
29  
30  
31  
32  
33  
34  
35  
36  
37  
38  
39  
40  
41  
42  
43  
44  
45  
46  
47  
48  
49  
50  
51  
52  
53  
54  
55  
56  
57  
58  
59  
60

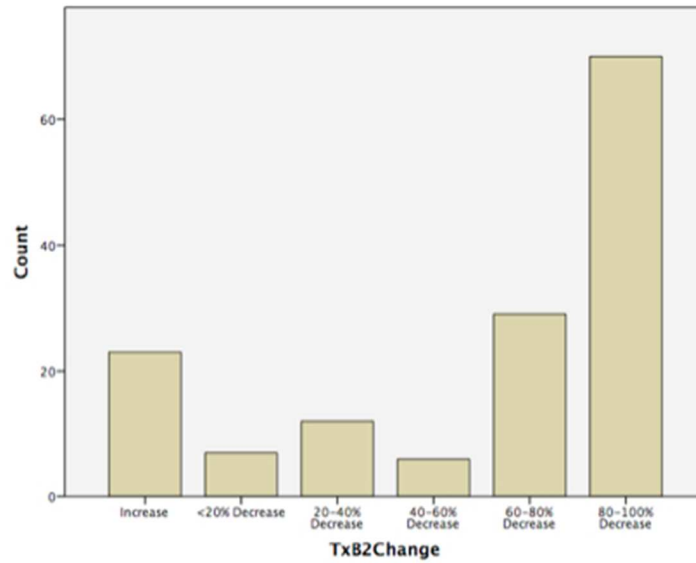

[Figure 2 - Histogram demonstrating percentage change in urinary thromboxane-B2 levels pre- and post aspirin administration (n=147) [TxB2 = urinary B2-thromboxane level]

Figure 2 - Histogram demonstrating percentage change in urinary thromboxane-B2 levels pre- and post aspirin administration (n=147) [TxB2 = urinary B2-thromboxane level]

204x180mm (72 x 72 DPI)

Preprint

| Outcome                                       | Low Dose Aspirin<br>(Group 1)<br>N=179 | No Aspirin<br>(Group 2)<br>N=183 | Screen and<br>Treat<br>(Group 3)<br>N=184 |
|-----------------------------------------------|----------------------------------------|----------------------------------|-------------------------------------------|
| Gestation at delivery (wks)                   | 40.2 (1.4)                             | 39.9 (1.9)                       | 40.2 (1.5)                                |
| Birthweight (g)                               | 3529 (469)                             | 3478 (493)                       | 3488 (502)                                |
| Birthweight <10 <sup>th</sup> centile No. (%) | 14 (8%)                                | 18(10%)                          | 25 (14%)                                  |
| Mode of delivery No. (%)                      |                                        |                                  |                                           |
| Spontaneous                                   | 85 (47.5)                              | 95 (52.0)                        | 88 (47.8)                                 |
| Instrumental                                  | 56 (31.3)                              | 47 (25.7)                        | 51 (27.7)                                 |
| Caesarean                                     | 38 (21.2)                              | 41 (22.3)                        | 45 (24.5)                                 |
| Pre-term delivery <34 weeks No. (%)           | 1 (0.6)                                | 3 (1.6)                          | 2 (1.1)                                   |
| Spontaneous Labor No. (%)                     | 96 (53.7)                              | 103 (56.3)                       | 101 (54.9)                                |
| Preeclampsia No. (%)                          | 8 (4.5)                                | 7 (3.8)                          | 7 (3.8)                                   |
| Preeclampsia <34-weeks                        | 0 (0)                                  | 2 (1.1)                          | 1 (0.5)                                   |
| Preeclampsia <37-weeks                        | 2 (1.1)                                | 2 (1.1)                          | 2 (1.1)                                   |
| Abruption No. (%)                             | 1 (0.5)                                | 0 (0)                            | 0 (0)                                     |
| NICU admission No. (%)                        | 9 (5.0)                                | 7 (3.8)                          | 9 (4.9)                                   |
| Apgar < 7 No. (%)                             | 5 (2.8)                                | 2 (1.6)                          | 3 (1.6)                                   |
| Cord pH (arterial)                            | 7.3 (0.1)                              | 7.3 (0.1)                        | 7.3 (0.1)                                 |
| Outcome No. (%)                               |                                        |                                  |                                           |
| Alive at 6-weeks                              | 177 (98.9)                             | 181 (99.0)                       | 182 (98.9)                                |
| Stillbirth                                    | 2 (1.1)                                | 1 (0.5)                          | 0 (0)                                     |
| Neonatal death                                | 0 (0)                                  | 1 (0.5)                          | 2 (1.1)                                   |

Table S1: Secondary outcome measures

(Expressed as average and standard deviation unless otherwise stated)

| Outcome                                       | Screen positive; Aspirin Group 3A<br>N=13 | Screen negative; No Aspirin Group 3B<br>N=171 | OR (95% CI)      |
|-----------------------------------------------|-------------------------------------------|-----------------------------------------------|------------------|
| Preeclampsia No. (%)                          | 2 (15.4)                                  | 6 (3.5)                                       | 5.0 (0.9 – 27.7) |
| Pre-eclampsia <34-weeks                       | 0 (0)                                     | 2 (1.2)                                       | -                |
| Pre-eclampsia <37-weeks                       | 2 (15.4)                                  | 2 (1.2)                                       | 15.4 (2.0 – 120) |
| Birthweight <10 <sup>th</sup> centile No. (%) | 4 (30.7)                                  | 21 (12.3)                                     | 3.2 (0.9 – 11.2) |
| Pre-term delivery <34 weeks No. (%)           | 1 (7.7)                                   | 1 (0.6)                                       | 14.1 (0.8 – 240) |
| NICU admission No. (%)                        | 0 (0)                                     | 9 (5.3)                                       | -                |
| Outcome No. (%)                               |                                           |                                               |                  |
| Alive at 6-weeks                              | 13 (100)                                  | 169 (98.8)                                    |                  |
| Stillbirth                                    | 0 (0)                                     | 2 (1.2)                                       |                  |
| Neonatal death                                | 0 (0)                                     | 0 (0)                                         |                  |

Table S2 - Secondary outcome measures in Group 3 (screen and treat)

(Expressed as average and standard deviation unless otherwise stated)

Note: ORs are not presented when number of events is 0 in the Screen –positive group.

| Adverse/Serious Adverse Event   | Low dose Aspirin<br>Group 1<br>N=179 | No-aspirin<br>Group 2<br>N=183 | Screen and treat<br>Group 3<br>N=184 |
|---------------------------------|--------------------------------------|--------------------------------|--------------------------------------|
| Adverse events                  |                                      |                                |                                      |
| Vaginal spotting No. (%)        | 27 (15.1)                            | 18 (9.8)                       | 12 (6.5)                             |
| Post-partum haemorrhage No. (%) |                                      |                                |                                      |
| >500mls                         | 25 (13.0)                            | 9 (4.9)                        | 12 (6.5)                             |
| >1000mls                        | 7 (3.6%)                             | 1 (0.5)                        | 4 (2.2)                              |
| Serious Adverse Events          |                                      |                                |                                      |
| NICU admission                  | 9 (5.0)                              | 7 (3.8)                        | 9 (4.9)                              |
| Perinatal Death                 | 2 (1.1)                              | 2 (1.1)                        | 2 (1.1)                              |
| Maternal admission              | 18 (10.1)                            | 15 (8.2)                       | 14 (7.6)                             |
| Congenital anomaly              | 3 (1.7)                              | 4 (2.2)                        | 3 (1.6)                              |
| Total serious adverse events    | 32 (17.8)                            | 28 (15.3)                      | 28 (15.2)                            |

Table S3 – Adverse and serious adverse events in all three groups. There may be >1 adverse event or serious adverse event per subject

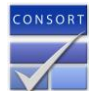

## CONSORT 2010 checklist of information to include when reporting a pilot or feasibility trial\*

| Section/Topic                    | Item No | Checklist item                                                                                                                                                                              | Reported on page No |
|----------------------------------|---------|---------------------------------------------------------------------------------------------------------------------------------------------------------------------------------------------|---------------------|
| <b>Title and abstract</b>        |         |                                                                                                                                                                                             |                     |
|                                  | 1a      | Identification as a pilot or feasibility randomised trial in the title                                                                                                                      | 1-3                 |
|                                  | 1b      | Structured summary of pilot trial design, methods, results, and conclusions (for specific guidance see CONSORT abstract extension for pilot trials)                                         | 45-72               |
| <b>Introduction</b>              |         |                                                                                                                                                                                             |                     |
| Background and objectives        | 2a      | Scientific background and explanation of rationale for future definitive trial, and reasons for randomised pilot trial                                                                      | 83-98               |
|                                  | 2b      | Specific objectives or research questions for pilot trial                                                                                                                                   | 98-104              |
| <b>Methods</b>                   |         |                                                                                                                                                                                             |                     |
| Trial design                     | 3a      | Description of pilot trial design (such as parallel, factorial) including allocation ratio                                                                                                  | 110, 137-139        |
|                                  | 3b      | Important changes to methods after pilot trial commencement (such as eligibility criteria), with reasons                                                                                    | N/A                 |
| Participants                     | 4a      | Eligibility criteria for participants                                                                                                                                                       | 123-133             |
|                                  | 4b      | Settings and locations where the data were collected                                                                                                                                        | 110-111             |
|                                  | 4c      | How participants were identified and consented                                                                                                                                              | 132-133             |
| Interventions                    | 5       | The interventions for each group with sufficient details to allow replication, including how and when they were actually administered                                                       | 146-188             |
| Outcomes                         | 6a      | Completely defined prespecified assessments or measurements to address each pilot trial objective specified in 2b, including how and when they were assessed                                | 190-223             |
|                                  | 6b      | Any changes to pilot trial assessments or measurements after the pilot trial commenced, with reasons                                                                                        | n/a                 |
|                                  | 6c      | If applicable, prespecified criteria used to judge whether, or how, to proceed with future definitive trial                                                                                 | 94-98               |
| Sample size                      | 7a      | Rationale for numbers in the pilot trial                                                                                                                                                    | 230-236             |
|                                  | 7b      | When applicable, explanation of any interim analyses and stopping guidelines                                                                                                                | n/a                 |
| Randomisation:                   |         |                                                                                                                                                                                             |                     |
| Sequence generation              | 8a      | Method used to generate the random allocation sequence                                                                                                                                      | 137-138             |
|                                  | 8b      | Type of randomisation(s); details of any restriction (such as blocking and block size)                                                                                                      | 138                 |
| Allocation concealment mechanism | 9       | Mechanism used to implement the random allocation sequence (such as sequentially numbered containers), describing any steps taken to conceal the sequence until interventions were assigned | 141-144             |

|                                                      |     |                                                                                                                                                                                       |                    |
|------------------------------------------------------|-----|---------------------------------------------------------------------------------------------------------------------------------------------------------------------------------------|--------------------|
| Implementation                                       | 10  | Who generated the random allocation sequence, who enrolled participants, and who assigned participants to interventions                                                               | 137-138, 141-142   |
| Blinding                                             | 11a | If done, who was blinded after assignment to interventions (for example, participants, care providers, those assessing outcomes) and how                                              | n/a                |
|                                                      | 11b | If relevant, description of the similarity of interventions                                                                                                                           | 138-141            |
| Statistical methods                                  | 12  | Methods used to address each pilot trial objective whether qualitative or quantitative                                                                                                | 236-242            |
| <b>Results</b>                                       |     |                                                                                                                                                                                       |                    |
| Participant flow (a diagram is strongly recommended) | 13a | For each group, the numbers of participants who were approached and/or assessed for eligibility, randomly assigned, received intended treatment, and were assessed for each objective | Figure 1           |
|                                                      | 13b | For each group, losses and exclusions after randomisation, together with reasons                                                                                                      | Figure 1           |
| Recruitment                                          | 14a | Dates defining the periods of recruitment and follow-up                                                                                                                               | 253-255            |
|                                                      | 14b | Why the pilot trial ended or was stopped                                                                                                                                              | 253-255            |
| Baseline data                                        | 15  | A table showing baseline demographic and clinical characteristics for each group                                                                                                      | 262-265            |
| Numbers analysed                                     | 16  | For each objective, number of participants (denominator) included in each analysis. If relevant, these numbers should be by randomised group                                          | Figure 1           |
| Outcomes and estimation                              | 17  | For each objective, results including expressions of uncertainty (such as 95% confidence interval) for any estimates. If relevant, these results should be by randomised group        | 334-365 + Table S2 |
| Ancillary analyses                                   | 18  | Results of any other analyses performed that could be used to inform the future definitive trial                                                                                      | Table S2           |
| Harms                                                | 19  | All important harms or unintended effects in each group (for specific guidance see CONSORT for harms)                                                                                 | 346-363            |
|                                                      | 19a | If relevant, other important unintended consequences                                                                                                                                  | 346-363            |
| <b>Discussion</b>                                    |     |                                                                                                                                                                                       |                    |
| Limitations                                          | 20  | Pilot trial limitations, addressing sources of potential bias and remaining uncertainty about feasibility                                                                             | 376-399            |
| Generalisability                                     | 21  | Generalisability (applicability) of pilot trial methods and findings to future definitive trial and other studies                                                                     |                    |
| Interpretation                                       | 22  | Interpretation consistent with pilot trial objectives and findings, balancing potential benefits and harms, and considering other relevant evidence                                   | 401-443            |
|                                                      | 22a | Implications for progression from pilot to future definitive trial, including any proposed amendments                                                                                 | 454-459            |
| <b>Other information</b>                             |     |                                                                                                                                                                                       | 401-443            |
| Registration                                         | 23  | Registration number for pilot trial and name of trial registry                                                                                                                        | 116-117            |
| Protocol                                             | 24  | Where the pilot trial protocol can be accessed, if available                                                                                                                          | Supplementary file |
| Funding                                              | 25  | Sources of funding and other support (such as supply of drugs), role of funders                                                                                                       | 116-120            |
|                                                      | 26  | Ethical approval or approval by research review committee, confirmed with reference number                                                                                            | 115-116            |

1  
2  
3  
4  
5  
6  
7  
8  
9  
10  
11  
12  
13  
14  
15  
16  
17  
18  
19  
20  
21  
22  
23  
24  
25  
26  
27  
28  
29  
30  
31  
32  
33  
34  
35  
36  
37  
38  
39  
40  
41  
42  
43  
44  
45  
46

Citation: Eldridge SM, Chan CL, Campbell MJ, Bond CM, Hopewell S, Thabane L, et al. CONSORT 2010 statement: extension to randomised pilot and feasibility trials. *BMJ*. 2016;355.  
\*We strongly recommend reading this statement in conjunction with the CONSORT 2010, extension to randomised pilot and feasibility trials, Explanation and Elaboration for important clarifications on all the items. If relevant, we also recommend reading CONSORT extensions for cluster randomised trials, non-inferiority and equivalence trials, non-pharmacological treatments, herbal interventions, and pragmatic trials. Additional extensions are forthcoming: for those and for up to date references relevant to this checklist, see [www.consort-statement.org](http://www.consort-statement.org).

For peer review only
