# Supplementary material for: Trial of feasibility and acceptability of routine low-dose aspirin versus Early Screening Test indicated aspirin for pre-eclampsia prevention (TEST study): a multicentre randomised controlled trial
Source: PubMed Central journal article supplement — BMJ Open. 2018 Jul 28;8(7):e022056. doi: 10.1136/bmjopen-2018-022056 (PMC6067363; doi:10.1136/bmjopen-2018-022056), 2018-07-28
Supplement: bmjopen-2018-022056supp001.pdf [file bmjopen-2018-022056supp001.pdf]

| Outcome                                       | Low Dose Aspirin<br>(Group 1)<br>N=179 | No Aspirin<br>(Group 2)<br>N=183 | Screen and<br>Treat<br>(Group 3)<br>N=184 |
|-----------------------------------------------|----------------------------------------|----------------------------------|-------------------------------------------|
| Gestation at delivery (wks)                   | 40.2 (1.4)                             | 39.9 (1.9)                       | 40.2 (1.5)                                |
| Birthweight (g)                               | 3529 (469)                             | 3478 (493)                       | 3488 (502)                                |
| Birthweight <10 <sup>th</sup> centile No. (%) | 14 (8%)                                | 18(10%)                          | 25 (14%)                                  |
| Mode of delivery No. (%)                      |                                        |                                  |                                           |
| Spontaneous                                   | 85 (47.5)                              | 95 (52.0)                        | 88 (47.8)                                 |
| Instrumental                                  | 56 (31.3)                              | 47 (25.7)                        | 51 (27.7)                                 |
| Caesarean                                     | 38 (21.2)                              | 41 (22.3)                        | 45 (24.5)                                 |
| Pre-term delivery <34 weeks No. (%)           | 1 (0.6)                                | 3 (1.6)                          | 2 (1.1)                                   |
| Spontaneous Labor No. (%)                     | 96 (53.7)                              | 103 (56.3)                       | 101 (54.9)                                |
| Preeclampsia No. (%)                          | 8 (4.5)                                | 7 (3.8)                          | 7 (3.8)                                   |
| Preeclampsia <34-weeks                        | 0 (0)                                  | 2 (1.1)                          | 1 (0.5)                                   |
| Preeclampsia <37-weeks                        | 2 (1.1)                                | 2 (1.1)                          | 2 (1.1)                                   |
| Abruption No. (%)                             | 1 (0.5)                                | 0 (0)                            | 0 (0)                                     |
| NICU admission No. (%)                        | 9 (5.0)                                | 7 (3.8)                          | 9 (4.9)                                   |
| Apgar < 7 No. (%)                             | 5 (2.8)                                | 2 (1.6)                          | 3 (1.6)                                   |
| Cord pH (arterial)                            | 7.3 (0.1)                              | 7.3 (0.1)                        | 7.3 (0.1)                                 |
| Outcome No. (%)                               |                                        |                                  |                                           |
| Alive at 6-weeks                              | 177 (98.9)                             | 181 (99.0)                       | 182 (98.9)                                |
| Stillbirth                                    | 2 (1.1)                                | 1 (0.5)                          | 0 (0)                                     |
| Neonatal death                                | 0 (0)                                  | 1 (0.5)                          | 2 (1.1)                                   |

Table S1: Secondary outcome measures

(Expressed as average and standard deviation unless otherwise stated)
